# Supplementary material for: Selectivity control of Pd(PMe3)4-catalyzed hydrogenation of internal alkynes to E-alkenes by reaction time and water content in formic acid
Source: Royal Society of Chemistry journal article supplement (doi:10.1039/c9dt01676g), 2019-01-01
Supplement: c9dt01676g2.pdf [file c9dt01676g2.pdf]

## 1 Cartesian Coordinates and Energies of the Optimized Structures

Cat

|                                              |             |             |                             |
|----------------------------------------------|-------------|-------------|-----------------------------|
| Zero-point correction=                       |             |             | 0.452500 (Hartree/Particle) |
| Thermal correction to Energy=                |             |             | 0.485519                    |
| Thermal correction to Enthalpy=              |             |             | 0.486463                    |
| Thermal correction to Gibbs Free Energy=     |             |             | 0.385122                    |
| Sum of electronic and zero-point Energies=   |             |             | -1971.034627                |
| Sum of electronic and thermal Energies=      |             |             | -1971.001608                |
| Sum of electronic and thermal Enthalpies=    |             |             | -1971.000664                |
| Sum of electronic and thermal Free Energies= |             |             | -1971.102005                |
| P                                            | -0.01875100 | 2.29048000  | -0.79588600                 |
| P                                            | 2.30084800  | -0.75385800 | 0.22422000                  |
| C                                            | -0.00575600 | 2.63798000  | -2.63918400                 |
| H                                            | 0.87801900  | 2.16393000  | -3.08751200                 |
| H                                            | -0.90393100 | 2.19461100  | -3.10346500                 |
| H                                            | 0.01350200  | 3.70590200  | -2.86718100                 |
| C                                            | 1.38860100  | 3.41820400  | -0.27652900                 |
| H                                            | 2.34328700  | 3.00919700  | -0.65477300                 |
| H                                            | 1.25721700  | 4.43467000  | -0.64192300                 |
| H                                            | 1.43934500  | 3.42687000  | 0.82418300                  |
| C                                            | -1.46640200 | 3.37570300  | -0.31043900                 |
| H                                            | -1.54649500 | 3.42159900  | 0.77813600                  |
| H                                            | -1.37341800 | 4.38747100  | -0.70649900                 |
| H                                            | -2.40164800 | 2.92554600  | -0.71102100                 |
| C                                            | 3.52737400  | -0.42140600 | -1.14606900                 |
| H                                            | 3.18895300  | -0.87080000 | -2.07478300                 |
| H                                            | 3.61589500  | 0.65882900  | -1.30832500                 |
| H                                            | 4.52918400  | -0.81060500 | -0.90367300                 |
| C                                            | 2.61615000  | -2.58351100 | 0.44583600                  |
| H                                            | 2.24854800  | -3.12480500 | -0.43700500                 |
| H                                            | 3.68108200  | -2.81314600 | 0.57472800                  |
| H                                            | 2.05724700  | -2.93838700 | 1.31698300                  |
| C                                            | 3.29237100  | -0.11877900 | 1.65532400                  |
| H                                            | 4.31412600  | -0.52197900 | 1.68289600                  |
| H                                            | 3.35088900  | 0.97535900  | 1.60735900                  |
| H                                            | 2.79797100  | -0.38424200 | 2.59510000                  |
| Pd                                           | 0.01594200  | -0.00324000 | -0.00754200                 |
| P                                            | -1.10647100 | -0.11543000 | 2.13897400                  |
| P                                            | -1.16618100 | -1.41729300 | -1.56959300                 |
| C                                            | -2.95047500 | 0.15818200  | 2.14370100                  |
| H                                            | -3.38048200 | 0.11132700  | 3.15328900                  |

|   |             |             |             |
|---|-------------|-------------|-------------|
| H | -3.17954900 | 1.11720600  | 1.69611600  |
| H | -3.42604200 | -0.62072700 | 1.53957400  |
| C | -1.03285600 | -1.68792000 | 3.11837000  |
| H | -1.42209000 | -2.51284300 | 2.52600000  |
| H | 0.02330100  | -1.92222000 | 3.35923000  |
| H | -1.60171100 | -1.63448300 | 4.06654300  |
| C | -0.63146600 | 1.08201700  | 3.49304400  |
| H | -1.21176400 | 0.92462400  | 4.40489500  |
| H | 0.42386300  | 0.97376900  | 3.71413700  |
| H | -0.80074900 | 2.10497300  | 3.13426400  |
| C | -2.68400200 | -0.73972900 | -2.44483100 |
| H | -3.42425900 | -0.42072100 | -1.68763600 |
| H | -2.39172300 | 0.16335000  | -3.01623700 |
| H | -3.14413700 | -1.46432900 | -3.11258000 |
| C | -1.90929700 | -3.02763900 | -0.94837700 |
| H | -2.40631100 | -3.60246900 | -1.75600300 |
| H | -1.12186200 | -3.64969800 | -0.50483400 |
| H | -2.64387800 | -2.82315100 | -0.16644900 |
| C | -0.23763800 | -2.07609900 | -3.05677500 |
| H | 0.61022700  | -2.67789000 | -2.71043000 |
| H | -0.87168500 | -2.68809000 | -3.70130700 |
| H | 0.16445900  | -1.23010800 | -3.64499800 |

## R

|                                              |             |             |                             |
|----------------------------------------------|-------------|-------------|-----------------------------|
| Zero-point correction=                       |             |             | 0.137347 (Hartree/Particle) |
| Thermal correction to Energy=                |             |             | 0.145707                    |
| Thermal correction to Enthalpy=              |             |             | 0.146651                    |
| Thermal correction to Gibbs Free Energy=     |             |             | 0.102763                    |
| Sum of electronic and zero-point Energies=   |             |             | -347.671452                 |
| Sum of electronic and thermal Energies=      |             |             | -347.663092                 |
| Sum of electronic and thermal Enthalpies=    |             |             | -347.662148                 |
| Sum of electronic and thermal Free Energies= |             |             | -347.706037                 |
| C                                            | -1.39390500 | 0.00026900  | -0.00000500                 |
| C                                            | -2.60031300 | 0.00036200  | -0.00000100                 |
| C                                            | 0.03421300  | 0.00011500  | -0.00001800                 |
| C                                            | 0.75098300  | -1.20916800 | -0.00000300                 |
| C                                            | 0.75127600  | 1.20924500  | -0.00000300                 |
| C                                            | 2.14108300  | -1.20539600 | 0.00000500                  |
| H                                            | 0.20520200  | -2.14502700 | 0.00000100                  |
| C                                            | 2.14134400  | 1.20517600  | 0.00000500                  |
| H                                            | 0.20577700  | 2.14526900  | 0.00000100                  |
| C                                            | 2.84175900  | -0.00019900 | 0.00000300                  |
| H                                            | 2.67962900  | -2.14651500 | 0.00001100                  |
| H                                            | 2.68009600  | 2.14617700  | 0.00001100                  |

|   |             |             |             |
|---|-------------|-------------|-------------|
| H | 3.92582700  | -0.00031000 | 0.00001000  |
| C | -4.05690800 | -0.00007500 | 0.00000700  |
| H | -4.45150500 | -0.51132800 | -0.88344000 |
| H | -4.45149600 | -0.51059800 | 0.88388000  |
| H | -4.45071700 | 1.02036500  | -0.00041200 |

### HCOOH

|                                              |             |             |                             |
|----------------------------------------------|-------------|-------------|-----------------------------|
| Zero-point correction=                       |             |             | 0.033869 (Hartree/Particle) |
| Thermal correction to Energy=                |             |             | 0.037027                    |
| Thermal correction to Enthalpy=              |             |             | 0.037971                    |
| Thermal correction to Gibbs Free Energy=     |             |             | 0.009795                    |
| Sum of electronic and zero-point Energies=   |             |             | -189.785611                 |
| Sum of electronic and thermal Energies=      |             |             | -189.782453                 |
| Sum of electronic and thermal Enthalpies=    |             |             | -189.781509                 |
| Sum of electronic and thermal Free Energies= |             |             | -189.809685                 |
| C                                            | 0.13601000  | 0.39808700  | -0.00003900                 |
| O                                            | 1.13450300  | -0.26298100 | 0.00001700                  |
| O                                            | -1.11781500 | -0.09030800 | 0.00001000                  |
| H                                            | 0.09772800  | 1.49591800  | -0.00002300                 |
| H                                            | -1.04729600 | -1.05813000 | 0.00004500                  |

### PMe3

|                                              |             |             |                             |
|----------------------------------------------|-------------|-------------|-----------------------------|
| Zero-point correction=                       |             |             | 0.112279 (Hartree/Particle) |
| Thermal correction to Energy=                |             |             | 0.118971                    |
| Thermal correction to Enthalpy=              |             |             | 0.119915                    |
| Thermal correction to Gibbs Free Energy=     |             |             | 0.084023                    |
| Sum of electronic and zero-point Energies=   |             |             | -461.051429                 |
| Sum of electronic and thermal Energies=      |             |             | -461.044737                 |
| Sum of electronic and thermal Enthalpies=    |             |             | -461.043793                 |
| Sum of electronic and thermal Free Energies= |             |             | -461.079686                 |
| P                                            | 0.00000000  | 0.00000000  | 0.60216600                  |
| C                                            | 0.00000000  | 1.64083400  | -0.27969100                 |
| H                                            | -0.88122300 | 2.21453400  | 0.01826600                  |
| H                                            | 0.88122300  | 2.21453400  | 0.01826600                  |
| H                                            | 0.00000000  | 1.53484100  | -1.36921500                 |
| C                                            | -1.42100400 | -0.82041700 | -0.27969100                 |
| H                                            | -2.35845400 | -0.34410600 | 0.01826600                  |
| H                                            | -1.32921200 | -0.76742100 | -1.36921500                 |
| H                                            | -1.47723200 | -1.87042900 | 0.01826600                  |
| C                                            | 1.42100400  | -0.82041700 | -0.27969100                 |
| H                                            | 1.32921200  | -0.76742100 | -1.36921500                 |
| H                                            | 2.35845400  | -0.34410600 | 0.01826600                  |
| H                                            | 1.47723200  | -1.87042900 | 0.01826600                  |

**Pd(PMe<sub>3</sub>)<sub>2</sub>**

|                                              |             |             |                             |
|----------------------------------------------|-------------|-------------|-----------------------------|
| Zero-point correction=                       |             |             | 0.227510 (Hartree/Particle) |
| Thermal correction to Energy=                |             |             | 0.244473                    |
| Thermal correction to Enthalpy=              |             |             | 0.245417                    |
| Thermal correction to Gibbs Free Energy=     |             |             | 0.180763                    |
| Sum of electronic and zero-point Energies=   |             |             | -1048.918508                |
| Sum of electronic and thermal Energies=      |             |             | -1048.901545                |
| Sum of electronic and thermal Enthalpies=    |             |             | -1048.900601                |
| Sum of electronic and thermal Free Energies= |             |             | -1048.965256                |
| Pd                                           | -0.00001500 | 0.00598200  | 0.00081100                  |
| P                                            | -2.31739900 | -0.00048400 | 0.00011300                  |
| P                                            | 2.31727600  | -0.00074700 | 0.00024100                  |
| C                                            | -3.16347400 | -0.40279000 | 1.59812900                  |
| H                                            | -2.84773300 | -1.39235800 | 1.93367700                  |
| H                                            | -2.85934800 | 0.31953000  | 2.35801000                  |
| H                                            | -4.25359100 | -0.38576200 | 1.50028700                  |
| C                                            | -3.15413800 | -1.19140300 | -1.14579500                 |
| H                                            | -2.83862000 | -2.20763200 | -0.90212300                 |
| H                                            | -4.24481800 | -1.12707500 | -1.07995400                 |
| H                                            | -2.84283000 | -0.98304900 | -2.17111200                 |
| C                                            | -3.17160700 | 1.57885700  | -0.45547000                 |
| H                                            | -2.86479700 | 1.87746200  | -1.45961600                 |
| H                                            | -4.26124600 | 1.47871800  | -0.42616500                 |
| H                                            | -2.86420500 | 2.36652300  | 0.23496200                  |
| C                                            | 3.16073300  | -0.75960100 | 1.46448800                  |
| H                                            | 2.85528700  | -0.23154100 | 2.36973300                  |
| H                                            | 2.84468600  | -1.79980900 | 1.56288500                  |
| H                                            | 4.25095500  | -0.72096800 | 1.37470500                  |
| C                                            | 3.16870000  | 1.64257000  | -0.07934300                 |
| H                                            | 2.86211500  | 2.24932300  | 0.77474900                  |
| H                                            | 4.25851500  | 1.54044800  | -0.07656200                 |
| H                                            | 2.85896400  | 2.16435300  | -0.98676700                 |
| C                                            | 3.15993900  | -0.89477900 | -1.38621700                 |
| H                                            | 4.25031800  | -0.84683700 | -1.30178000                 |
| H                                            | 2.84466700  | -1.93988500 | -1.38506300                 |
| H                                            | 2.85328500  | -0.45527500 | -2.33721500                 |

**Com0**

|                                            |  |  |                             |
|--------------------------------------------|--|--|-----------------------------|
| Zero-point correction=                     |  |  | 0.365392 (Hartree/Particle) |
| Thermal correction to Energy=              |  |  | 0.392943                    |
| Thermal correction to Enthalpy=            |  |  | 0.393888                    |
| Thermal correction to Gibbs Free Energy=   |  |  | 0.297348                    |
| Sum of electronic and zero-point Energies= |  |  | -1396.592781                |
| Sum of electronic and thermal Energies=    |  |  | -1396.565229                |

|                                              |             |             |              |
|----------------------------------------------|-------------|-------------|--------------|
| Sum of electronic and thermal Enthalpies=    |             |             | -1396.564285 |
| Sum of electronic and thermal Free Energies= |             |             | -1396.660825 |
| Pd                                           | 2.03434100  | 0.43546200  | 0.00085100   |
| C                                            | -3.05169600 | -1.51290600 | 0.01930600   |
| C                                            | -4.39802800 | -1.03652500 | 0.00548000   |
| C                                            | -5.07178500 | -0.82369600 | -1.21021600  |
| C                                            | -5.07821300 | -0.77159600 | 1.20728600   |
| C                                            | -6.38238200 | -0.36020300 | -1.21975700  |
| H                                            | -4.55577700 | -1.02741600 | -2.14080200  |
| C                                            | -6.38877700 | -0.30821800 | 1.18988300   |
| H                                            | -4.56722700 | -0.93506200 | 2.14852400   |
| C                                            | -7.04629800 | -0.10031800 | -0.02173100  |
| H                                            | -6.88783000 | -0.20183000 | -2.16594300  |
| H                                            | -6.89921500 | -0.10925900 | 2.12567100   |
| H                                            | -8.06842400 | 0.26072500  | -0.03222300  |
| C                                            | -1.91541400 | -1.92213600 | 0.03108500   |
| P                                            | 3.91330600  | -0.92166100 | -0.00653000  |
| P                                            | 0.25882000  | 1.94417700  | 0.00018800   |
| C                                            | 4.53816300  | -1.49094600 | -1.65491400  |
| H                                            | 3.76104000  | -2.07096600 | -2.15618600  |
| H                                            | 4.75735300  | -0.62069100 | -2.27620400  |
| H                                            | 5.44053100  | -2.10346200 | -1.56160700  |
| C                                            | 3.84196900  | -2.53035300 | 0.91081200   |
| H                                            | 3.04689500  | -3.15118100 | 0.49348000   |
| H                                            | 4.78928500  | -3.07558000 | 0.85337500   |
| H                                            | 3.60194800  | -2.33793000 | 1.95816500   |
| C                                            | 5.45301100  | -0.18521600 | 0.71289400   |
| H                                            | 5.27003900  | 0.08708500  | 1.75392100   |
| H                                            | 6.29831200  | -0.87899900 | 0.66460200   |
| H                                            | 5.70439000  | 0.72673400  | 0.16848400   |
| C                                            | 0.72346600  | 3.73703200  | 0.01300700   |
| H                                            | 1.32348600  | 3.94883100  | 0.89988800   |
| H                                            | 1.33319800  | 3.95902100  | -0.86471400  |
| H                                            | -0.15922500 | 4.38426300  | 0.01187700   |
| C                                            | -0.92628300 | 1.87319900  | 1.41969100   |
| H                                            | -0.37932000 | 2.00462700  | 2.35520300   |
| H                                            | -1.69850900 | 2.64481500  | 1.34168500   |
| H                                            | -1.40397800 | 0.89202700  | 1.43754000   |
| C                                            | -0.90821000 | 1.88854000  | -1.43491400  |
| H                                            | -1.68120300 | 2.65958400  | -1.35892800  |
| H                                            | -0.34946600 | 2.02893500  | -2.36210400  |
| H                                            | -1.38584600 | 0.90775700  | -1.46871500  |
| C                                            | -0.54458300 | -2.41171000 | 0.04577400   |
| H                                            | -0.35421700 | -3.01056100 | 0.94157100   |

|   |             |             |             |
|---|-------------|-------------|-------------|
| H | -0.34564600 | -3.03854900 | -0.82882100 |
| H | 0.17817200  | -1.58160100 | 0.03612000  |

### TS0

|                                              |             |             |                             |
|----------------------------------------------|-------------|-------------|-----------------------------|
| Zero-point correction=                       |             |             | 0.364993 (Hartree/Particle) |
| Thermal correction to Energy=                |             |             | 0.391482                    |
| Thermal correction to Enthalpy=              |             |             | 0.392426                    |
| Thermal correction to Gibbs Free Energy=     |             |             | 0.304162                    |
| Sum of electronic and zero-point Energies=   |             |             | -1396.580715                |
| Sum of electronic and thermal Energies=      |             |             | -1396.554226                |
| Sum of electronic and thermal Enthalpies=    |             |             | -1396.553282                |
| Sum of electronic and thermal Free Energies= |             |             | -1396.641545                |
| Pd                                           | 0.75303600  | 0.04206800  | -0.20817500                 |
| C                                            | -1.21578600 | -1.65148800 | -0.69628300                 |
| C                                            | -2.44008200 | -1.30836300 | -0.04144100                 |
| C                                            | -3.63501800 | -1.20487300 | -0.77623500                 |
| C                                            | -2.48439600 | -1.09710800 | 1.34841300                  |
| C                                            | -4.83240700 | -0.89663300 | -0.13896300                 |
| H                                            | -3.61132600 | -1.37041600 | -1.84675600                 |
| C                                            | -3.68620400 | -0.79620500 | 1.97876200                  |
| H                                            | -1.56412100 | -1.16482800 | 1.91550400                  |
| C                                            | -4.86482200 | -0.69257500 | 1.23966500                  |
| H                                            | -5.74423000 | -0.81933500 | -0.72088100                 |
| H                                            | -3.70335000 | -0.63994400 | 3.05178900                  |
| H                                            | -5.79999700 | -0.45574600 | 1.73416700                  |
| C                                            | -0.24662000 | -2.06911400 | -1.30301100                 |
| P                                            | 2.89850600  | -0.50375400 | 0.52687800                  |
| P                                            | -0.36088500 | 2.11734700  | -0.36167400                 |
| C                                            | 4.27161100  | 0.62762900  | -0.00805700                 |
| H                                            | 4.38065900  | 0.57863200  | -1.09351100                 |
| H                                            | 4.01137400  | 1.65440900  | 0.25465800                  |
| H                                            | 5.22690500  | 0.36607800  | 0.45939300                  |
| C                                            | 3.74654100  | -2.14043700 | 0.24474300                  |
| H                                            | 3.87408100  | -2.30484800 | -0.82751500                 |
| H                                            | 4.72933200  | -2.18543100 | 0.72563600                  |
| H                                            | 3.12358900  | -2.94613100 | 0.63986200                  |
| C                                            | 3.08473000  | -0.38844900 | 2.37154400                  |
| H                                            | 2.42541500  | -1.11632600 | 2.84870900                  |
| H                                            | 4.11480400  | -0.57592500 | 2.69201700                  |
| H                                            | 2.78122800  | 0.60611200  | 2.70287500                  |
| C                                            | 0.70135400  | 3.57006800  | -0.82071500                 |
| H                                            | 1.49553600  | 3.68229100  | -0.08024000                 |
| H                                            | 1.17053900  | 3.38234400  | -1.78856800                 |
| H                                            | 0.12639500  | 4.50057800  | -0.87566900                 |

|   |             |             |             |
|---|-------------|-------------|-------------|
| C | -1.16386800 | 2.77532700  | 1.17682900  |
| H | -0.42112700 | 2.83234800  | 1.97504600  |
| H | -1.59965000 | 3.76755800  | 1.02067600  |
| H | -1.94838300 | 2.08596500  | 1.49449100  |
| C | -1.74773600 | 2.35266800  | -1.57627900 |
| H | -2.14210300 | 3.37407900  | -1.56127600 |
| H | -1.38685300 | 2.12572600  | -2.58185800 |
| H | -2.55362600 | 1.65420200  | -1.34297900 |
| C | 0.73405200  | -2.78617900 | -2.11568100 |
| H | 1.50316100  | -3.24204000 | -1.48822500 |
| H | 0.24542200  | -3.57959200 | -2.69175600 |
| H | 1.23423100  | -2.11438900 | -2.81734800 |

### M0

|                                              |             |             |                             |
|----------------------------------------------|-------------|-------------|-----------------------------|
| Zero-point correction=                       |             |             | 0.366151 (Hartree/Particle) |
| Thermal correction to Energy=                |             |             | 0.392488                    |
| Thermal correction to Enthalpy=              |             |             | 0.393433                    |
| Thermal correction to Gibbs Free Energy=     |             |             | 0.307351                    |
| Sum of electronic and zero-point Energies=   |             |             | -1396.593143                |
| Sum of electronic and thermal Energies=      |             |             | -1396.566806                |
| Sum of electronic and thermal Enthalpies=    |             |             | -1396.565861                |
| Sum of electronic and thermal Free Energies= |             |             | -1396.651943                |
| Pd                                           | 0.63662700  | -0.22835900 | -0.03075500                 |
| C                                            | -1.21068000 | -1.33110700 | -0.03216200                 |
| C                                            | -2.60536800 | -0.96170000 | -0.01497400                 |
| C                                            | -3.29286400 | -0.66589700 | -1.20677200                 |
| C                                            | -3.31736900 | -0.88470900 | 1.19637200                  |
| C                                            | -4.63926600 | -0.31657800 | -1.18515600                 |
| H                                            | -2.75661500 | -0.71968000 | -2.14725000                 |
| C                                            | -4.66345200 | -0.53293600 | 1.21110900                  |
| H                                            | -2.80059100 | -1.10783100 | 2.12265300                  |
| C                                            | -5.33303500 | -0.24545800 | 0.02242400                  |
| H                                            | -5.15016600 | -0.09969400 | -2.11735700                 |
| H                                            | -5.19281300 | -0.48481200 | 2.15687500                  |
| H                                            | -6.38152700 | 0.02960600  | 0.03659000                  |
| C                                            | -0.25519900 | -2.15627200 | -0.04245500                 |
| P                                            | 3.00242600  | -0.45708200 | 0.00147700                  |
| P                                            | 0.02113900  | 2.09098900  | 0.01061900                  |
| C                                            | 4.05724700  | 0.79069700  | -0.87681700                 |
| H                                            | 3.79098800  | 0.80621900  | -1.93582100                 |
| H                                            | 3.86174700  | 1.78263800  | -0.46597700                 |
| H                                            | 5.12439100  | 0.56756500  | -0.78131600                 |
| C                                            | 3.72267600  | -2.02275200 | -0.68226500                 |
| H                                            | 3.44528100  | -2.11615500 | -1.73424000                 |

|   |             |             |             |
|---|-------------|-------------|-------------|
| H | 4.81346700  | -2.04713500 | -0.59616400 |
| H | 3.30169500  | -2.87637100 | -0.14826800 |
| C | 3.77369200  | -0.43377300 | 1.68669700  |
| H | 3.33871900  | -1.23156600 | 2.29165500  |
| H | 4.85939000  | -0.56536000 | 1.64603800  |
| H | 3.54660800  | 0.51574700  | 2.17524700  |
| C | 1.25871100  | 3.47526100  | 0.04063300  |
| H | 1.91070300  | 3.36447900  | 0.90999900  |
| H | 1.87839400  | 3.43038600  | -0.85741500 |
| H | 0.77352400  | 4.45516400  | 0.08579300  |
| C | -1.03987900 | 2.55982400  | 1.45379600  |
| H | -0.47789000 | 2.41429600  | 2.37869500  |
| H | -1.37349000 | 3.60059400  | 1.39743700  |
| H | -1.91089500 | 1.90279400  | 1.48197000  |
| C | -1.04592800 | 2.63059300  | -1.40327700 |
| H | -1.36442800 | 3.67280600  | -1.30261400 |
| H | -0.49401900 | 2.51408600  | -2.33829900 |
| H | -1.92715400 | 1.98819400  | -1.44862700 |
| C | 0.19117700  | -3.56708600 | -0.06272000 |
| H | 0.80441800  | -3.79944100 | 0.81318900  |
| H | -0.66257800 | -4.25442300 | -0.07005800 |
| H | 0.80172300  | -3.77481700 | -0.94605700 |

### M1<sub>Me-a</sub>

|                                              |             |             |                             |
|----------------------------------------------|-------------|-------------|-----------------------------|
| Zero-point correction=                       |             |             | 0.400772 (Hartree/Particle) |
| Thermal correction to Energy=                |             |             | 0.431945                    |
| Thermal correction to Enthalpy=              |             |             | 0.432889                    |
| Thermal correction to Gibbs Free Energy=     |             |             | 0.332233                    |
| Sum of electronic and zero-point Energies=   |             |             | -1586.394543                |
| Sum of electronic and thermal Energies=      |             |             | -1586.363371                |
| Sum of electronic and thermal Enthalpies=    |             |             | -1586.362427                |
| Sum of electronic and thermal Free Energies= |             |             | -1586.463083                |
| Pd                                           | 0.41043300  | -0.33346900 | -0.32656800                 |
| C                                            | -0.52921800 | -2.17707400 | 0.14448500                  |
| C                                            | -1.45795800 | -1.32538900 | 0.06186100                  |
| P                                            | 2.75738500  | -0.77060800 | -0.55221000                 |
| P                                            | -0.04955800 | 1.98744700  | -0.78325800                 |
| C                                            | 3.56914700  | -1.72993700 | 0.80519000                  |
| H                                            | 3.55692800  | -1.12254300 | 1.71128500                  |
| H                                            | 3.01009900  | -2.64841700 | 0.99106200                  |
| H                                            | 4.60417400  | -1.98296200 | 0.55601100                  |
| C                                            | 3.98546000  | 0.59771700  | -0.76475000                 |
| H                                            | 3.94614900  | 1.24095100  | 0.11533100                  |
| H                                            | 5.00187900  | 0.20982700  | -0.88242000                 |



|   |             |             |             |
|---|-------------|-------------|-------------|
| H | 3.72945300  | 1.19020500  | -1.64533800 |
| C | 3.14785700  | -1.82475700 | -2.02597800 |
| H | 2.81963100  | -1.31560400 | -2.93437700 |
| H | 4.21846900  | -2.03790400 | -2.10217400 |
| H | 2.60001900  | -2.76613600 | -1.95375100 |
| C | 1.29366800  | 3.25971500  | -0.68193400 |
| H | 1.75755400  | 3.21463900  | 0.30534900  |
| H | 2.06435800  | 3.04026300  | -1.42296500 |
| H | 0.91132700  | 4.27002000  | -0.85564100 |
| C | -1.34153600 | 2.77072500  | 0.28448500  |
| H | -1.01537300 | 2.73879000  | 1.32583600  |
| H | -1.53090200 | 3.80941900  | -0.00253300 |
| H | -2.26763500 | 2.19857100  | 0.20919500  |
| C | -0.73421500 | 2.31730200  | -2.47156300 |
| H | -0.96796800 | 3.37629900  | -2.61612600 |
| H | -0.01163800 | 2.00442700  | -3.22785800 |
| H | -1.64309700 | 1.72851700  | -2.60795700 |
| H | 0.56218700  | 0.29778200  | 1.82790400  |
| C | 1.64988900  | 1.08760800  | 3.20689300  |
| O | 0.48778900  | 0.60900000  | 2.77227300  |
| O | 2.67848800  | 1.16090200  | 2.58274200  |
| H | 1.54472500  | 1.42263100  | 4.25046600  |
| C | -2.84142500 | -0.91231600 | 0.10299900  |
| C | -3.39688300 | -0.35588700 | 1.26934600  |
| C | -3.67036800 | -1.06087400 | -1.02356500 |
| C | -4.73385700 | 0.02628000  | 1.30654300  |
| H | -2.76722100 | -0.22922500 | 2.14232500  |
| C | -5.00615700 | -0.67436800 | -0.97988900 |
| H | -3.25406700 | -1.48627500 | -1.92938400 |
| C | -5.54624000 | -0.12851600 | 0.18366800  |
| H | -5.14377600 | 0.44729500  | 2.21841600  |
| H | -5.62879800 | -0.80230100 | -1.85897200 |
| H | -6.58727600 | 0.17225400  | 0.21549500  |
| C | -0.11226000 | -3.57224600 | 0.40699800  |
| H | 0.46087900  | -3.98079200 | -0.43024900 |
| H | 0.52708200  | -3.62967400 | 1.29289700  |
| H | -0.98010600 | -4.22019600 | 0.57345800  |

## H<sub>2</sub>O

|                                            |                             |
|--------------------------------------------|-----------------------------|
| Zero-point correction=                     | 0.021309 (Hartree/Particle) |
| Thermal correction to Energy=              | 0.024144                    |
| Thermal correction to Enthalpy=            | 0.025088                    |
| Thermal correction to Gibbs Free Energy=   | 0.003007                    |
| Sum of electronic and zero-point Energies= | -76.426139                  |

|                                              |             |             |            |
|----------------------------------------------|-------------|-------------|------------|
| Sum of electronic and thermal Energies=      |             |             | -76.423304 |
| Sum of electronic and thermal Enthalpies=    |             |             | -76.422360 |
| Sum of electronic and thermal Free Energies= |             |             | -76.444441 |
| O                                            | 0.00000000  | 0.11873600  | 0.00000000 |
| H                                            | 0.75704900  | -0.47481200 | 0.00000000 |
| H                                            | -0.75704900 | -0.47507600 | 0.00000000 |

### M1<sub>Me</sub>w-b

|                                              |             |             |                             |
|----------------------------------------------|-------------|-------------|-----------------------------|
| Zero-point correction=                       |             |             | 0.425620 (Hartree/Particle) |
| Thermal correction to Energy=                |             |             | 0.459837                    |
| Thermal correction to Enthalpy=              |             |             | 0.460782                    |
| Thermal correction to Gibbs Free Energy=     |             |             | 0.354400                    |
| Sum of electronic and zero-point Energies=   |             |             | -1662.839813                |
| Sum of electronic and thermal Energies=      |             |             | -1662.805595                |
| Sum of electronic and thermal Enthalpies=    |             |             | -1662.804651                |
| Sum of electronic and thermal Free Energies= |             |             | -1662.911033                |
| Pd                                           | 0.11270000  | 0.62750000  | -0.36880000                 |
| C                                            | -1.81220000 | 1.08470000  | 0.43440000                  |
| C                                            | -3.13910000 | 0.50930000  | 0.45800000                  |
| C                                            | -3.79520000 | 0.13200000  | -0.72660000                 |
| C                                            | -3.81700000 | 0.32120000  | 1.67670000                  |
| C                                            | -5.07900000 | -0.40160000 | -0.69440000                 |
| H                                            | -3.28570000 | 0.27870000  | -1.67170000                 |
| C                                            | -5.09640000 | -0.22490000 | 1.70600000                  |
| H                                            | -3.32820000 | 0.60910000  | 2.60070000                  |
| C                                            | -5.73530000 | -0.58880000 | 0.52190000                  |
| H                                            | -5.56940000 | -0.67540000 | -1.62240000                 |
| H                                            | -5.59810000 | -0.36330000 | 2.65770000                  |
| H                                            | -6.73270000 | -1.01270000 | 0.54610000                  |
| C                                            | -1.00330000 | 1.99510000  | 0.78940000                  |
| P                                            | 0.02900000  | -1.47540000 | -1.54990000                 |
| P                                            | 2.34970000  | 1.49530000  | -0.50230000                 |
| C                                            | -0.70330000 | -1.43420000 | -3.25140000                 |
| H                                            | -1.72060000 | -1.04270000 | -3.19890000                 |
| H                                            | -0.11690000 | -0.76700000 | -3.88630000                 |
| H                                            | -0.72740000 | -2.42940000 | -3.70540000                 |
| C                                            | -1.01650000 | -2.76530000 | -0.73530000                 |
| H                                            | -2.03470000 | -2.38670000 | -0.62820000                 |
| H                                            | -1.03270000 | -3.69770000 | -1.30750000                 |
| H                                            | -0.62140000 | -2.95690000 | 0.26370000                  |
| C                                            | 1.58600000  | -2.42570000 | -1.85900000                 |
| H                                            | 2.13100000  | -2.54760000 | -0.92140000                 |
| H                                            | 1.37720000  | -3.40800000 | -2.29340000                 |
| H                                            | 2.22380000  | -1.86490000 | -2.54460000                 |

|   |             |             |             |
|---|-------------|-------------|-------------|
| C | 3.15980000  | 1.89140000  | 1.11320000  |
| H | 2.50630000  | 2.53600000  | 1.70330000  |
| H | 3.31790000  | 0.96110000  | 1.66050000  |
| H | 4.12370000  | 2.38920000  | 0.97060000  |
| C | 2.42120000  | 3.13710000  | -1.35870000 |
| H | 1.75500000  | 3.83890000  | -0.85410000 |
| H | 3.43550000  | 3.54760000  | -1.36860000 |
| H | 2.07210000  | 3.02490000  | -2.38710000 |
| C | 3.72590000  | 0.59480000  | -1.35000000 |
| H | 4.64560000  | 1.18810000  | -1.35160000 |
| H | 3.90690000  | -0.34570000 | -0.82760000 |
| H | 3.44480000  | 0.37940000  | -2.38290000 |
| C | -0.78450000 | 3.28630000  | 1.47970000  |
| H | -0.40620000 | 4.04470000  | 0.78800000  |
| H | -1.71350000 | 3.66470000  | 1.92130000  |
| H | -0.04520000 | 3.18810000  | 2.28080000  |
| H | 0.54900000  | -0.75300000 | 1.40070000  |
| O | 0.49640000  | -1.34960000 | 2.18000000  |
| O | 2.73700000  | -2.45620000 | 3.11740000  |
| O | 3.60680000  | -1.83050000 | 1.12910000  |
| H | -0.27870000 | -1.04860000 | 2.66490000  |
| H | 1.90640000  | -2.01960000 | 2.77990000  |
| C | 3.69250000  | -2.36860000 | 2.20960000  |
| H | 4.61040000  | -2.85940000 | 2.56840000  |

### TS1<sub>ph-f</sub>

|                                              |             |             |                             |
|----------------------------------------------|-------------|-------------|-----------------------------|
| Zero-point correction=                       |             |             | 0.395947 (Hartree/Particle) |
| Thermal correction to Energy=                |             |             | 0.426083                    |
| Thermal correction to Enthalpy=              |             |             | 0.427027                    |
| Thermal correction to Gibbs Free Energy=     |             |             | 0.332372                    |
| Sum of electronic and zero-point Energies=   |             |             | -1586.360693                |
| Sum of electronic and thermal Energies=      |             |             | -1586.330557                |
| Sum of electronic and thermal Enthalpies=    |             |             | -1586.329613                |
| Sum of electronic and thermal Free Energies= |             |             | -1586.424268                |
| Pd                                           | 0.37767500  | 0.06343200  | -0.27343600                 |
| C                                            | -0.58521500 | -2.01297700 | -0.50675000                 |
| C                                            | -1.37091500 | -0.98622400 | -0.30130900                 |
| P                                            | 2.78140100  | 0.30297300  | -0.77326400                 |
| P                                            | -0.19693800 | 2.10463700  | 0.66521100                  |
| C                                            | 3.95672400  | 0.24217000  | 0.64220700                  |
| H                                            | 3.78401000  | 1.09260500  | 1.30518900                  |
| H                                            | 3.78719000  | -0.67946000 | 1.20643400                  |
| H                                            | 4.99139900  | 0.27515700  | 0.28784700                  |
| C                                            | 3.33044900  | 1.81665900  | -1.69223300                 |

|   |             |             |             |
|---|-------------|-------------|-------------|
| H | 3.13382900  | 2.71268000  | -1.09947200 |
| H | 4.39952700  | 1.77903700  | -1.91994000 |
| H | 2.77351700  | 1.89891000  | -2.62814600 |
| C | 3.40391600  | -1.04194800 | -1.86871000 |
| H | 2.84082800  | -1.04891100 | -2.80425900 |
| H | 4.46766900  | -0.91224900 | -2.08837300 |
| H | 3.24086300  | -1.98406000 | -1.34556300 |
| C | -0.66296400 | 3.44000700  | -0.52003400 |
| H | 0.15148600  | 3.60176300  | -1.22794500 |
| H | -1.54650600 | 3.13267100  | -1.08131200 |
| H | -0.87971100 | 4.37691800  | 0.00097600  |
| C | 1.11218900  | 2.91871300  | 1.67976000  |
| H | 1.97915700  | 3.14534700  | 1.05769800  |
| H | 0.74421100  | 3.84606500  | 2.12761800  |
| H | 1.42946600  | 2.23866200  | 2.47201700  |
| C | -1.61760400 | 2.09562300  | 1.83812300  |
| H | -1.81914400 | 3.09960300  | 2.22205100  |
| H | -2.50685700 | 1.71325600  | 1.33640300  |
| H | -1.38592200 | 1.43131300  | 2.67246500  |
| O | 1.80881100  | -2.45452400 | 0.53529500  |
| H | 0.60954800  | -2.12871700 | 0.01828300  |
| C | -2.78943400 | -0.68757200 | -0.25165800 |
| C | -3.64121500 | -1.41486700 | 0.59985700  |
| C | -3.35309600 | 0.31971700  | -1.05575900 |
| C | -5.00488100 | -1.14176800 | 0.64385200  |
| H | -3.21775600 | -2.18902000 | 1.22885700  |
| C | -4.71816900 | 0.58009000  | -1.01953000 |
| H | -2.70545800 | 0.87661800  | -1.72336400 |
| C | -5.54915900 | -0.14550100 | -0.16499600 |
| H | -5.64518600 | -1.71070700 | 1.30885800  |
| H | -5.13733100 | 1.34916200  | -1.65907000 |
| H | -6.61239700 | 0.06322000  | -0.13202300 |
| C | -0.87380700 | -3.34275700 | -1.16201600 |
| H | -0.61307000 | -4.16461300 | -0.48931900 |
| H | -1.92522300 | -3.43273900 | -1.44773100 |
| H | -0.25480500 | -3.46257400 | -2.05592900 |
| C | 1.90696000  | -2.64899800 | 1.81352400  |
| H | 0.99434600  | -3.08087100 | 2.28647900  |
| O | 2.88114200  | -2.39714000 | 2.50522400  |

### TS1<sub>phw-c</sub>

|                                 |                             |
|---------------------------------|-----------------------------|
| Zero-point correction=          | 0.422055 (Hartree/Particle) |
| Thermal correction to Energy=   | 0.454701                    |
| Thermal correction to Enthalpy= | 0.455646                    |

|                                              |             |             |              |
|----------------------------------------------|-------------|-------------|--------------|
| Thermal correction to Gibbs Free Energy=     |             |             | 0.356051     |
| Sum of electronic and zero-point Energies=   |             |             | -1662.802426 |
| Sum of electronic and thermal Energies=      |             |             | -1662.769780 |
| Sum of electronic and thermal Enthalpies=    |             |             | -1662.768836 |
| Sum of electronic and thermal Free Energies= |             |             | -1662.868431 |
| Pd                                           | -0.20240000 | 0.69180000  | 1.39850000   |
| C                                            | 1.80950000  | 0.63970000  | 0.21230000   |
| C                                            | 1.25050000  | 1.78660000  | 0.49870000   |
| P                                            | -1.70240000 | -1.27670000 | 1.63480000   |
| P                                            | -1.14890000 | 2.25700000  | 2.84940000   |
| C                                            | -2.98530000 | -1.32520000 | 2.97270000   |
| H                                            | -2.50130000 | -1.35880000 | 3.95060000   |
| H                                            | -3.62320000 | -0.44020000 | 2.92760000   |
| H                                            | -3.61580000 | -2.21240000 | 2.86740000   |
| C                                            | -0.91480000 | -2.92550000 | 1.85830000   |
| H                                            | -0.34170000 | -2.93160000 | 2.78710000   |
| H                                            | -1.67160000 | -3.71430000 | 1.89150000   |
| H                                            | -0.22780000 | -3.11430000 | 1.03390000   |
| C                                            | -2.73560000 | -1.52280000 | 0.12750000   |
| H                                            | -2.06280000 | -1.72370000 | -0.70920000  |
| H                                            | -3.42490000 | -2.36220000 | 0.25650000   |
| H                                            | -3.30840000 | -0.61700000 | -0.08240000  |
| C                                            | -0.21670000 | 3.81260000  | 3.17510000   |
| H                                            | 0.77060000  | 3.56340000  | 3.56750000   |
| H                                            | -0.08020000 | 4.37280000  | 2.25070000   |
| H                                            | -0.74720000 | 4.43430000  | 3.90160000   |
| C                                            | -1.39900000 | 1.64040000  | 4.57110000   |
| H                                            | -0.44470000 | 1.28910000  | 4.96730000   |
| H                                            | -1.78520000 | 2.43400000  | 5.21680000   |
| H                                            | -2.09880000 | 0.80590000  | 4.57520000   |
| C                                            | -2.82110000 | 2.89690000  | 2.39970000   |
| H                                            | -3.20100000 | 3.58600000  | 3.15930000   |
| H                                            | -2.76150000 | 3.41870000  | 1.44310000   |
| H                                            | -3.51940000 | 2.06610000  | 2.28900000   |
| H                                            | 1.83870000  | -0.40940000 | 1.00360000   |
| C                                            | 2.46640000  | -2.54920000 | 1.17420000   |
| O                                            | 2.36260000  | -1.41110000 | 1.75240000   |
| O                                            | 2.01850000  | -2.89090000 | 0.07490000   |
| O                                            | 0.07660000  | -1.71130000 | -1.54420000  |
| H                                            | 0.77940000  | -2.15640000 | -1.02520000  |
| H                                            | 0.15620000  | -0.78920000 | -1.27910000  |
| C                                            | 1.44690000  | 3.19250000  | 0.19450000   |
| C                                            | 2.67930000  | 3.81300000  | 0.46550000   |
| C                                            | 0.42790000  | 3.95910000  | -0.39860000  |

|   |             |             |             |
|---|-------------|-------------|-------------|
| C | 2.88100000  | 5.15500000  | 0.15760000  |
| H | 3.47070000  | 3.23120000  | 0.92310000  |
| C | 0.63830000  | 5.29560000  | -0.71860000 |
| H | -0.52140000 | 3.48440000  | -0.62000000 |
| C | 1.86350000  | 5.90070000  | -0.43540000 |
| H | 3.83660000  | 5.61860000  | 0.37590000  |
| H | -0.15230000 | 5.86740000  | -1.19190000 |
| H | 2.02450000  | 6.94450000  | -0.67980000 |
| C | 2.80380000  | 0.32660000  | -0.88630000 |
| H | 2.46200000  | -0.51680000 | -1.48810000 |
| H | 2.96810000  | 1.19210000  | -1.53290000 |
| H | 3.75580000  | 0.02650000  | -0.43870000 |
| H | 3.02980000  | -3.29660000 | 1.77130000  |

### M2<sub>ph-f</sub>

|                                              |             |             |                             |
|----------------------------------------------|-------------|-------------|-----------------------------|
| Zero-point correction=                       |             |             | 0.402933 (Hartree/Particle) |
| Thermal correction to Energy=                |             |             | 0.432626                    |
| Thermal correction to Enthalpy=              |             |             | 0.433570                    |
| Thermal correction to Gibbs Free Energy=     |             |             | 0.341191                    |
| Sum of electronic and zero-point Energies=   |             |             | -1586.404271                |
| Sum of electronic and thermal Energies=      |             |             | -1586.374578                |
| Sum of electronic and thermal Enthalpies=    |             |             | -1586.373634                |
| Sum of electronic and thermal Free Energies= |             |             | -1586.466013                |
| Pd                                           | 0.49403800  | 0.01989500  | -0.47451300                 |
| C                                            | -0.38580400 | -1.74741100 | -1.26718400                 |
| C                                            | -1.34054000 | -1.04310400 | -0.83552800                 |
| P                                            | 2.86645800  | -0.03324300 | -0.80760100                 |
| P                                            | -0.12815600 | 2.09620500  | 0.58778700                  |
| C                                            | 3.98256200  | 0.70910600  | 0.46924800                  |
| H                                            | 3.76212000  | 1.77298200  | 0.57192200                  |
| H                                            | 3.79504800  | 0.22965300  | 1.43192700                  |
| H                                            | 5.03713600  | 0.58806900  | 0.20473300                  |
| C                                            | 3.43630200  | 0.83305400  | -2.34152200                 |
| H                                            | 3.14771400  | 1.88475600  | -2.29443000                 |
| H                                            | 4.52097800  | 0.76484600  | -2.46680100                 |
| H                                            | 2.94700100  | 0.38899400  | -3.21042100                 |
| C                                            | 3.66133400  | -1.69142800 | -1.02328000                 |
| H                                            | 3.18673500  | -2.21753600 | -1.85310500                 |
| H                                            | 4.73427300  | -1.60526200 | -1.21922000                 |
| H                                            | 3.51389700  | -2.28287400 | -0.11752800                 |
| C                                            | -1.24497600 | 3.14578500  | -0.44823900                 |
| H                                            | -0.72636800 | 3.43656400  | -1.36410600                 |
| H                                            | -2.12418400 | 2.56211900  | -0.72664200                 |
| H                                            | -1.56400800 | 4.04686800  | 0.08395600                  |

|   |             |             |             |
|---|-------------|-------------|-------------|
| C | 1.12670500  | 3.34686900  | 1.13247400  |
| H | 1.72998800  | 3.65923500  | 0.27722700  |
| H | 0.65315300  | 4.22999100  | 1.57158900  |
| H | 1.78988100  | 2.89706500  | 1.87393400  |
| C | -1.12622400 | 1.91113300  | 2.13297600  |
| H | -1.44056300 | 2.88013600  | 2.53162900  |
| H | -2.00963200 | 1.30794800  | 1.91552100  |
| H | -0.53327900 | 1.38861800  | 2.88613200  |
| O | 1.42499700  | -0.91011700 | 2.45658400  |
| H | 1.10341600  | -0.63414200 | 1.56057600  |
| C | -2.73463200 | -0.75049600 | -0.59500500 |
| C | -3.35924600 | -1.12436300 | 0.60823700  |
| C | -3.50504600 | -0.08290700 | -1.56439800 |
| C | -4.70484300 | -0.84681300 | 0.82768300  |
| H | -2.78042100 | -1.63969700 | 1.36589000  |
| C | -4.85017100 | 0.19142900  | -1.33869000 |
| H | -3.03614500 | 0.21106200  | -2.49630700 |
| C | -5.45781800 | -0.18650600 | -0.14212700 |
| H | -5.16746900 | -1.15017500 | 1.76059700  |
| H | -5.42718700 | 0.70134200  | -2.10265900 |
| H | -6.50572500 | 0.02926500  | 0.03178300  |
| C | 0.07248500  | -2.98841600 | -1.93033600 |
| H | 0.76225200  | -3.54764700 | -1.29215600 |
| H | -0.77262000 | -3.64202000 | -2.17321700 |
| H | 0.60507100  | -2.76377100 | -2.85898200 |
| C | 0.86734200  | -2.08574400 | 2.79863800  |
| H | 0.17882900  | -2.47718700 | 2.02843800  |
| O | 1.09941000  | -2.64237000 | 3.83177200  |

### M2<sub>phw-c</sub>

|                                              |             |             |                             |
|----------------------------------------------|-------------|-------------|-----------------------------|
| Zero-point correction=                       |             |             | 0.427906 (Hartree/Particle) |
| Thermal correction to Energy=                |             |             | 0.459384                    |
| Thermal correction to Enthalpy=              |             |             | 0.460328                    |
| Thermal correction to Gibbs Free Energy=     |             |             | 0.364950                    |
| Sum of electronic and zero-point Energies=   |             |             | -1662.844469                |
| Sum of electronic and thermal Energies=      |             |             | -1662.812991                |
| Sum of electronic and thermal Enthalpies=    |             |             | -1662.812047                |
| Sum of electronic and thermal Free Energies= |             |             | -1662.907424                |
| Pd                                           | 0.34772100  | 0.00157900  | -0.15231000                 |
| C                                            | -1.50937300 | 2.24700200  | 0.30324800                  |
| C                                            | -1.48193900 | 0.95152700  | -0.03372200                 |
| P                                            | 2.41929400  | -1.17813000 | -0.80554200                 |
| P                                            | 0.08846600  | -0.74085700 | 1.99861800                  |
| C                                            | 2.94207900  | -2.80872400 | -0.10349300                 |

|   |             |             |             |
|---|-------------|-------------|-------------|
| H | 3.18286400  | -2.70642200 | 0.95644300  |
| H | 2.13156900  | -3.53274600 | -0.20802700 |
| H | 3.82450900  | -3.19162000 | -0.62324600 |
| C | 3.96674600  | -0.18802400 | -0.71284500 |
| H | 4.22101900  | -0.00596900 | 0.33285900  |
| H | 4.79666500  | -0.70161900 | -1.20621600 |
| H | 3.78749300  | 0.78032100  | -1.18350800 |
| C | 2.28003500  | -1.56675600 | -2.60164000 |
| H | 2.01038100  | -0.65090500 | -3.12826900 |
| H | 3.21684600  | -1.96767200 | -2.99781800 |
| H | 1.48191500  | -2.29616100 | -2.75482900 |
| C | -1.24780500 | -0.03345100 | 3.04089000  |
| H | -1.15860400 | 1.05230300  | 3.05282300  |
| H | -2.21947600 | -0.29699700 | 2.62356100  |
| H | -1.17160400 | -0.42210700 | 4.06017100  |
| C | 1.60596700  | -0.30098500 | 2.93861100  |
| H | 1.83562400  | 0.74630300  | 2.72836200  |
| H | 1.46663000  | -0.46189200 | 4.01097900  |
| H | 2.44397000  | -0.90833000 | 2.59322900  |
| C | -0.13434900 | -2.54978900 | 2.27375300  |
| H | -0.15185100 | -2.78094700 | 3.34244500  |
| H | -1.07698900 | -2.86699500 | 1.82400400  |
| H | 0.67594900  | -3.10551200 | 1.80183900  |
| H | -0.58273000 | 2.68785600  | 0.66739000  |
| C | 2.44904400  | 2.92503900  | 0.07708800  |
| O | 1.83658200  | 2.30999100  | 0.96467300  |
| O | 2.40026100  | 2.73647400  | -1.18150200 |
| O | 0.67274900  | 1.14279200  | -2.00831500 |
| H | 1.40991000  | 1.83137100  | -1.65657900 |
| H | -0.12978400 | 1.66896900  | -2.10547100 |
| C | -2.62694800 | 0.13537400  | -0.49038500 |
| C | -3.81921800 | 0.06040300  | 0.25279000  |
| C | -2.55004400 | -0.62364900 | -1.67352700 |
| C | -4.88503400 | -0.73241100 | -0.16767300 |
| H | -3.90801500 | 0.63431000  | 1.16805800  |
| C | -3.61713700 | -1.40802300 | -2.09712700 |
| H | -1.64139600 | -0.58392300 | -2.26387200 |
| C | -4.79022100 | -1.47079100 | -1.34455300 |
| H | -5.79243000 | -0.77035000 | 0.42579600  |
| H | -3.53380400 | -1.97353700 | -3.01906800 |
| H | -5.61953100 | -2.08691200 | -1.67329400 |
| C | -2.68073500 | 3.19459200  | 0.20459900  |
| H | -2.38912600 | 4.09815700  | -0.34178500 |
| H | -3.54113100 | 2.75208200  | -0.29897600 |



|   |             |            |            |
|---|-------------|------------|------------|
| H | -3.00189200 | 3.52763800 | 1.19940300 |
| H | 3.13830500  | 3.74143500 | 0.38878500 |

### M2<sub>ph-c</sub>

Zero-point correction= 0.403290 (Hartree/Particle)

|                                              |              |
|----------------------------------------------|--------------|
| Thermal correction to Energy=                | 0.432749     |
| Thermal correction to Enthalpy=              | 0.433694     |
| Thermal correction to Gibbs Free Energy=     | 0.343008     |
| Sum of electronic and zero-point Energies=   | -1586.416654 |
| Sum of electronic and thermal Energies=      | -1586.387194 |
| Sum of electronic and thermal Enthalpies=    | -1586.386250 |
| Sum of electronic and thermal Free Energies= | -1586.476935 |

|    |             |             |             |
|----|-------------|-------------|-------------|
| Pd | 0.64505200  | 0.09227000  | -0.11538200 |
| C  | -1.06292500 | -0.59289900 | 2.19495200  |
| C  | -1.09745200 | -0.34188000 | 0.87509700  |
| P  | 0.26484700  | 2.41933300  | 0.05117900  |
| P  | 1.31111300  | -2.18438900 | -0.09872700 |
| C  | 1.40705000  | 3.15440100  | 1.29026200  |
| H  | 1.10722700  | 2.81921200  | 2.28510000  |
| H  | 2.41663100  | 2.78462600  | 1.10767500  |
| H  | 1.38402400  | 4.24720500  | 1.25515900  |
| C  | -1.37205000 | 3.11175300  | 0.52114900  |
| H  | -1.65449100 | 2.72922700  | 1.50274600  |
| H  | -1.33533800 | 4.20383500  | 0.55444800  |
| H  | -2.12961200 | 2.79486100  | -0.19655500 |
| C  | 0.66573100  | 3.28847100  | -1.51882000 |
| H  | -0.09520700 | 3.04888100  | -2.26427800 |
| H  | 0.70684600  | 4.37200600  | -1.37947600 |
| H  | 1.62393900  | 2.91588200  | -1.88101900 |
| C  | 2.61276600  | -2.42082600 | 1.17821300  |
| H  | 3.36486900  | -1.63900600 | 1.06324900  |
| H  | 2.16106300  | -2.30627600 | 2.16564900  |
| H  | 3.06929500  | -3.41192800 | 1.10493000  |
| C  | 2.11272200  | -2.70814200 | -1.66931600 |
| H  | 2.81951000  | -1.93509800 | -1.96995600 |
| H  | 2.62430000  | -3.66774300 | -1.55773400 |
| H  | 1.35482500  | -2.79443800 | -2.45066600 |
| C  | 0.12308400  | -3.54714100 | 0.24628600  |
| H  | 0.63795700  | -4.51080000 | 0.28232700  |
| H  | -0.37117600 | -3.36038900 | 1.19984400  |
| H  | -0.64306800 | -3.57729200 | -0.52991000 |
| H  | -0.10176300 | -0.49608700 | 2.69834900  |
| C  | 3.54305600  | 0.74876600  | -0.65088600 |
| O  | 2.44084000  | 0.54128200  | -1.28001000 |

|   |             |             |             |
|---|-------------|-------------|-------------|
| O | 3.73533800  | 0.72470800  | 0.56318400  |
| H | 4.39106800  | 0.97195800  | -1.33517900 |
| C | -2.18155700 | -1.05611500 | 3.10073300  |
| H | -3.04767700 | -1.42123500 | 2.54755000  |
| H | -1.82739400 | -1.86437400 | 3.75012100  |
| H | -2.52404500 | -0.25513900 | 3.76838700  |
| C | -2.32291000 | -0.36789000 | 0.04103200  |
| C | -2.30445500 | -0.90105700 | -1.26092500 |
| C | -3.54024000 | 0.17858700  | 0.49066000  |
| C | -3.44672500 | -0.92826200 | -2.05399200 |
| H | -1.36986900 | -1.28231100 | -1.65479600 |
| C | -4.68306500 | 0.16116000  | -0.30522100 |
| H | -3.58504100 | 0.63904800  | 1.46962000  |
| C | -4.64643900 | -0.40003400 | -1.57952900 |
| H | -3.39757100 | -1.35378800 | -3.05060700 |
| H | -5.60414600 | 0.59322800  | 0.07153300  |
| H | -5.53589000 | -0.41391300 | -2.19925500 |

### TS1<sub>ph</sub>'-a

|                                              |             |             |                             |
|----------------------------------------------|-------------|-------------|-----------------------------|
| Zero-point correction=                       |             |             | 0.396186 (Hartree/Particle) |
| Thermal correction to Energy=                |             |             | 0.426243                    |
| Thermal correction to Enthalpy=              |             |             | 0.427187                    |
| Thermal correction to Gibbs Free Energy=     |             |             | 0.332632                    |
| Sum of electronic and zero-point Energies=   |             |             | -1586.349366                |
| Sum of electronic and thermal Energies=      |             |             | -1586.319308                |
| Sum of electronic and thermal Enthalpies=    |             |             | -1586.318364                |
| Sum of electronic and thermal Free Energies= |             |             | -1586.412919                |
| Pd                                           | 0.50272300  | -0.30986100 | 0.19691100                  |
| C                                            | -0.74833700 | 1.56573300  | 1.30126900                  |
| C                                            | -1.29850500 | 0.58569300  | 0.62488600                  |
| P                                            | 2.74012400  | 0.30653900  | -0.64188300                 |
| P                                            | 0.21612900  | -2.61354400 | 0.39726700                  |
| C                                            | 2.65112800  | 1.29926500  | -2.19538400                 |
| H                                            | 2.10324600  | 0.74740200  | -2.96176900                 |
| H                                            | 2.11494200  | 2.22104400  | -1.96247100                 |
| H                                            | 3.64977100  | 1.54205300  | -2.57140500                 |
| C                                            | 3.98115300  | -0.99621000 | -1.09213000                 |
| H                                            | 3.56076400  | -1.65974500 | -1.85126700                 |
| H                                            | 4.90311400  | -0.55545400 | -1.48269000                 |
| H                                            | 4.22481100  | -1.59478000 | -0.21143100                 |
| C                                            | 3.73689600  | 1.41911800  | 0.44291000                  |

|   |             |             |             |
|---|-------------|-------------|-------------|
| H | 3.89506000  | 0.95313600  | 1.41768000  |
| H | 4.70830700  | 1.64476700  | -0.00758800 |
| H | 3.17090200  | 2.34353000  | 0.57009300  |
| C | 0.34419600  | -3.60500300 | -1.15890900 |
| H | -0.43824700 | -3.29641200 | -1.85448500 |
| H | 1.31047600  | -3.41740300 | -1.63007400 |
| H | 0.24143900  | -4.67622200 | -0.96144200 |
| C | -1.36150400 | -3.25797000 | 1.11392100  |
| H | -2.20417600 | -2.89899300 | 0.52083200  |
| H | -1.37825900 | -4.35175200 | 1.14257100  |
| H | -1.47659600 | -2.86989300 | 2.12765400  |
| C | 1.46704200  | -3.44937600 | 1.47304800  |
| H | 1.29058500  | -4.52752300 | 1.53193500  |
| H | 2.46723300  | -3.27120500 | 1.07520000  |
| H | 1.42158100  | -3.02525100 | 2.47767200  |
| C | 0.25111200  | 4.22570900  | -0.18472700 |
| O | 1.26712800  | 3.52807500  | -0.12171400 |
| O | -0.92362800 | 3.95437900  | 0.24499400  |
| H | 0.31224500  | 5.22666100  | -0.66629200 |
| H | -0.94068600 | 2.70587900  | 0.77726700  |
| C | -2.57421000 | 0.35250900  | -0.02452400 |
| C | -2.68046200 | -0.41014000 | -1.20137600 |
| C | -3.74931100 | 0.89938800  | 0.52626900  |
| C | -3.91302400 | -0.61513600 | -1.80783100 |
| H | -1.77497300 | -0.81690200 | -1.63616200 |
| C | -4.98198700 | 0.68927400  | -0.08004300 |
| H | -3.67483300 | 1.49583400  | 1.42730600  |
| C | -5.06852700 | -0.06942300 | -1.24657100 |
| H | -3.97622900 | -1.19423300 | -2.72238800 |
| H | -5.87643600 | 1.12123700  | 0.35441700  |
| H | -6.03070200 | -0.23149500 | -1.71936200 |
| C | 0.13416000  | 1.70987800  | 2.50708800  |
| H | 0.44642700  | 0.75317600  | 2.93217300  |
| H | 1.01218300  | 2.30457200  | 2.24827200  |
| H | -0.41791900 | 2.26716800  | 3.27344500  |

### TS1<sub>ph</sub>'w-a

|                                            |                             |
|--------------------------------------------|-----------------------------|
| Zero-point correction=                     | 0.420948 (Hartree/Particle) |
| Thermal correction to Energy=              | 0.454081                    |
| Thermal correction to Enthalpy=            | 0.455025                    |
| Thermal correction to Gibbs Free Energy=   | 0.352378                    |
| Sum of electronic and zero-point Energies= | -1662.793852                |
| Sum of electronic and thermal Energies=    | -1662.760719                |
| Sum of electronic and thermal Enthalpies=  | -1662.759775                |

|                                              |             |             |              |
|----------------------------------------------|-------------|-------------|--------------|
| Sum of electronic and thermal Free Energies= |             |             | -1662.862422 |
| Pd                                           | -0.73042400 | -0.32056900 | -0.09267100  |
| C                                            | 1.09811800  | 1.25532100  | -1.26153500  |
| C                                            | 1.24031200  | 0.20583700  | -0.50464000  |
| P                                            | -2.90847000 | 0.52396100  | 0.71289300   |
| P                                            | -0.56657000 | -2.56879000 | -0.65285600  |
| C                                            | -2.79549500 | 1.69618700  | 2.13426600   |
| H                                            | -2.26480000 | 1.22900900  | 2.96598800   |
| H                                            | -2.23365100 | 2.56817800  | 1.79215900   |
| H                                            | -3.78870900 | 2.00867100  | 2.47178800   |
| C                                            | -4.19635700 | -0.67300200 | 1.30125400   |
| H                                            | -3.79090100 | -1.27938700 | 2.11399700   |
| H                                            | -5.09176800 | -0.15571100 | 1.65879700   |
| H                                            | -4.47899000 | -1.34110200 | 0.48470800   |
| C                                            | -3.85448000 | 1.52953000  | -0.51293800  |
| H                                            | -4.06333400 | 0.93525400  | -1.40478200  |
| H                                            | -4.79807500 | 1.89000300  | -0.09218300  |
| H                                            | -3.22705100 | 2.37935900  | -0.78619200  |
| C                                            | -2.08081200 | -3.26090200 | -1.45772200  |
| H                                            | -2.93539600 | -3.13623400 | -0.79081100  |
| H                                            | -2.28516000 | -2.71377400 | -2.37966500  |
| H                                            | -1.95949000 | -4.32301200 | -1.69116300  |
| C                                            | -0.32441800 | -3.73988000 | 0.75511000   |
| H                                            | 0.62333800  | -3.52014300 | 1.24884500   |
| H                                            | -1.12913300 | -3.60870000 | 1.48037700   |
| H                                            | -0.31504600 | -4.77802600 | 0.40991400   |
| C                                            | 0.75125300  | -3.11866000 | -1.82424000  |
| H                                            | 0.64573600  | -2.57676400 | -2.76573200  |
| H                                            | 1.72965800  | -2.88014900 | -1.40510400  |
| H                                            | 0.69287200  | -4.19396900 | -2.01749500  |
| C                                            | 2.42962300  | 4.10679500  | -0.08336800  |
| O                                            | 2.86617100  | 3.09875400  | -0.74584400  |
| O                                            | -1.34795400 | 3.74162400  | -0.08906700  |
| H                                            | 3.22652300  | 4.84437600  | 0.14437100   |
| H                                            | 1.98369400  | 2.19178700  | -0.94064100  |
| O                                            | 1.28410700  | 4.33365200  | 0.30635600   |
| H                                            | -0.38017300 | 3.80151200  | 0.07208100   |
| H                                            | -1.60651400 | 4.66051500  | -0.20817400  |
| C                                            | 2.36083700  | -0.39082200 | 0.21664400   |
| C                                            | 3.64319900  | -0.39552000 | -0.36189700  |
| C                                            | 2.20350900  | -0.95886300 | 1.49296000   |
| C                                            | 4.72500900  | -0.95186400 | 0.31254500   |
| H                                            | 3.77914400  | 0.05746600  | -1.33605900  |
| C                                            | 3.28677700  | -1.51312300 | 2.16505400   |

|   |             |             |             |
|---|-------------|-------------|-------------|
| H | 1.22213400  | -0.94242000 | 1.95327100  |
| C | 4.55127100  | -1.51545200 | 1.57540900  |
| H | 5.70719400  | -0.93969200 | -0.14666400 |
| H | 3.14899400  | -1.93373700 | 3.15511000  |
| H | 5.39625900  | -1.94642000 | 2.10059200  |
| C | 0.21206600  | 1.73786300  | -2.36825100 |
| H | -0.39121400 | 2.58183600  | -2.02215900 |
| H | 0.84052400  | 2.10418300  | -3.18744400 |
| H | -0.45261200 | 0.96277900  | -2.75889000 |

### M2<sub>ph</sub>'w-a

|                                              |             |             |                             |
|----------------------------------------------|-------------|-------------|-----------------------------|
| Zero-point correction=                       |             |             | 0.427238 (Hartree/Particle) |
| Thermal correction to Energy=                |             |             | 0.459220                    |
| Thermal correction to Enthalpy=              |             |             | 0.460164                    |
| Thermal correction to Gibbs Free Energy=     |             |             | 0.361187                    |
| Sum of electronic and zero-point Energies=   |             |             | -1662.844593                |
| Sum of electronic and thermal Energies=      |             |             | -1662.812612                |
| Sum of electronic and thermal Enthalpies=    |             |             | -1662.811667                |
| Sum of electronic and thermal Free Energies= |             |             | -1662.910644                |
| Pd                                           | 0.55511800  | -0.27338700 | 0.29658200                  |
| C                                            | -1.58271400 | -0.51618200 | 2.37934000                  |
| C                                            | -1.37202200 | -0.33627000 | 1.06856300                  |
| P                                            | 2.83802800  | 0.31023600  | -0.44542300                 |
| P                                            | 0.24064400  | -2.46453900 | -0.36420200                 |
| C                                            | 2.80596600  | 1.54171500  | -1.81495200                 |
| H                                            | 2.42704100  | 1.06604400  | -2.72215100                 |
| H                                            | 2.13614200  | 2.36205200  | -1.55435600                 |
| H                                            | 3.80683400  | 1.93659900  | -2.01082800                 |
| C                                            | 4.16774100  | -0.84758900 | -1.01198400                 |
| H                                            | 3.86952200  | -1.35042000 | -1.93346700                 |
| H                                            | 5.09643400  | -0.30134500 | -1.19855300                 |
| H                                            | 4.35692500  | -1.60631200 | -0.25027400                 |
| C                                            | 3.66816800  | 1.20893400  | 0.92720900                  |
| H                                            | 3.92182400  | 0.50359900  | 1.72164900                  |
| H                                            | 4.57709100  | 1.71218700  | 0.58679000                  |
| H                                            | 2.94962700  | 1.92845400  | 1.32034500                  |
| C                                            | 1.68339600  | -3.39517000 | -1.04183000                 |
| H                                            | 2.05652000  | -2.89976000 | -1.93866500                 |
| H                                            | 2.48678400  | -3.43047100 | -0.30505000                 |
| H                                            | 1.39178200  | -4.41698900 | -1.29868900                 |
| C                                            | -0.99635700 | -2.65935400 | -1.71118200                 |
| H                                            | -1.95488500 | -2.25130000 | -1.39120600                 |
| H                                            | -0.66665000 | -2.09839200 | -2.58737500                 |
| H                                            | -1.11543400 | -3.71247200 | -1.97987300                 |

|   |             |             |             |
|---|-------------|-------------|-------------|
| C | -0.35728100 | -3.62004100 | 0.93777400  |
| H | 0.37906600  | -3.67425200 | 1.74143000  |
| H | -1.28905700 | -3.24017900 | 1.35462100  |
| H | -0.51499600 | -4.62005200 | 0.52531300  |
| C | -0.27303800 | 4.63604800  | -0.13526900 |
| O | -0.69005400 | 4.72722200  | 0.99496300  |
| O | 0.63016200  | 1.71730000  | 0.95033700  |
| H | -0.35606600 | 5.45799800  | -0.86964900 |
| H | -2.59915500 | -0.37728400 | 2.75622600  |
| O | 0.32504100  | 3.58753800  | -0.67234000 |
| H | 0.42673500  | 2.80807000  | 0.03635200  |
| H | -0.06268100 | 1.83378200  | 1.60988600  |
| C | -2.48103900 | -0.03334500 | 0.13479800  |
| C | -3.69618100 | -0.74005600 | 0.20161200  |
| C | -2.35671500 | 0.96127800  | -0.85129700 |
| C | -4.74490700 | -0.45839100 | -0.67085700 |
| H | -3.81190400 | -1.52170700 | 0.94470500  |
| C | -3.40730100 | 1.24453200  | -1.71810800 |
| H | -1.43768000 | 1.53061200  | -0.91531400 |
| C | -4.60553300 | 0.53564400  | -1.63673100 |
| H | -5.67088500 | -1.01896400 | -0.59641100 |
| H | -3.29020300 | 2.02873700  | -2.45823200 |
| H | -5.42016800 | 0.75598900  | -2.31752200 |
| C | -0.55899700 | -0.84980500 | 3.42787300  |
| H | -0.48846300 | -0.05195200 | 4.17617100  |
| H | -0.83189400 | -1.76253800 | 3.97226900  |
| H | 0.43197400  | -0.98756100 | 2.99004000  |

### M2<sub>phw-e</sub>

|                                              |             |             |                             |
|----------------------------------------------|-------------|-------------|-----------------------------|
| Zero-point correction=                       |             |             | 0.427783 (Hartree/Particle) |
| Thermal correction to Energy=                |             |             | 0.460501                    |
| Thermal correction to Enthalpy=              |             |             | 0.461446                    |
| Thermal correction to Gibbs Free Energy=     |             |             | 0.363078                    |
| Sum of electronic and zero-point Energies=   |             |             | -1662.862325                |
| Sum of electronic and thermal Energies=      |             |             | -1662.829607                |
| Sum of electronic and thermal Enthalpies=    |             |             | -1662.828662                |
| Sum of electronic and thermal Free Energies= |             |             | -1662.927030                |
| Pd                                           | 0.53344100  | 0.04738400  | -0.28878200                 |
| C                                            | -0.96972300 | -0.34547300 | 2.19169800                  |
| C                                            | -1.13826800 | -0.21705100 | 0.86541600                  |
| P                                            | 0.27235300  | 2.39722000  | -0.21174300                 |
| P                                            | 1.01760500  | -2.28153100 | -0.22217200                 |
| C                                            | 1.60701600  | 3.17187400  | 0.78781800                  |
| H                                            | 1.62061400  | 2.70540500  | 1.77401200                  |

|   |             |             |             |
|---|-------------|-------------|-------------|
| H | 2.57087200  | 2.96523100  | 0.32191100  |
| H | 1.45883300  | 4.25167100  | 0.87554500  |
| C | -1.25552800 | 3.15944400  | 0.46751800  |
| H | -1.37383900 | 2.85143600  | 1.50709700  |
| H | -1.19900400 | 4.24989600  | 0.41488100  |
| H | -2.12502500 | 2.81179400  | -0.09145900 |
| C | 0.44229700  | 3.16919200  | -1.87298900 |
| H | -0.42183800 | 2.90219200  | -2.48430800 |
| H | 0.51585200  | 4.25815800  | -1.80742900 |
| H | 1.33529000  | 2.76217500  | -2.34870200 |
| C | -0.19883800 | -3.48907800 | 0.44652100  |
| H | -0.43254800 | -3.22624700 | 1.47843200  |
| H | -1.12384200 | -3.44624800 | -0.13006200 |
| H | 0.20530200  | -4.50422400 | 0.41019400  |
| C | 2.52156900  | -2.60518100 | 0.78584100  |
| H | 2.38690500  | -2.16233800 | 1.77369500  |
| H | 2.71603400  | -3.67802200 | 0.86885200  |
| H | 3.37434500  | -2.10610300 | 0.32499900  |
| C | 1.44045400  | -2.96825500 | -1.87753900 |
| H | 1.86836700  | -3.97123400 | -1.79994200 |
| H | 0.54247500  | -3.00922700 | -2.49721600 |
| H | 2.15255200  | -2.29398300 | -2.35449500 |
| H | 0.04235600  | -0.23157400 | 2.57677000  |
| C | 3.44433800  | 0.49386500  | -1.09986800 |
| O | 2.28354100  | 0.31379700  | -1.59552300 |
| O | 3.77139600  | 0.54335800  | 0.09386300  |
| H | 4.23896000  | 0.61784400  | -1.86472100 |
| C | -2.00371100 | -0.68394200 | 3.24139800  |
| H | -2.92967900 | -1.07553300 | 2.81784600  |
| H | -1.60025200 | -1.43299800 | 3.93157500  |
| H | -2.25880800 | 0.18931300  | 3.85576000  |
| C | -2.43211500 | -0.26167800 | 0.14593700  |
| C | -2.54412500 | -0.86496600 | -1.12068500 |
| C | -3.59335000 | 0.33973400  | 0.67007000  |
| C | -3.75468200 | -0.90960600 | -1.80433600 |
| H | -1.65642500 | -1.28752300 | -1.57620000 |
| C | -4.80457500 | 0.30340800  | -0.01616000 |
| H | -3.53902600 | 0.85802800  | 1.61889000  |
| C | -4.89629200 | -0.32896000 | -1.25393500 |
| H | -3.80448300 | -1.39030300 | -2.77557200 |
| H | -5.67879100 | 0.77816500  | 0.41683300  |
| H | -5.83918600 | -0.35657200 | -1.78831500 |
| O | 2.42894200  | 0.32578000  | 2.52937200  |
| H | 2.84247200  | 0.39344100  | 1.64180800  |

|   |            |            |            |
|---|------------|------------|------------|
| H | 3.16601600 | 0.41894400 | 3.14009100 |
|---|------------|------------|------------|

**M2<sub>ph-c</sub>**

|                        |  |  |                             |
|------------------------|--|--|-----------------------------|
| Zero-point correction= |  |  | 0.403290 (Hartree/Particle) |
|------------------------|--|--|-----------------------------|

|                               |  |  |          |
|-------------------------------|--|--|----------|
| Thermal correction to Energy= |  |  | 0.432749 |
|-------------------------------|--|--|----------|

|                                 |  |  |          |
|---------------------------------|--|--|----------|
| Thermal correction to Enthalpy= |  |  | 0.433694 |
|---------------------------------|--|--|----------|

|                                          |  |  |          |
|------------------------------------------|--|--|----------|
| Thermal correction to Gibbs Free Energy= |  |  | 0.343008 |
|------------------------------------------|--|--|----------|

|                                            |  |  |              |
|--------------------------------------------|--|--|--------------|
| Sum of electronic and zero-point Energies= |  |  | -1586.416654 |
|--------------------------------------------|--|--|--------------|

|                                         |  |  |              |
|-----------------------------------------|--|--|--------------|
| Sum of electronic and thermal Energies= |  |  | -1586.387194 |
|-----------------------------------------|--|--|--------------|

|                                           |  |  |              |
|-------------------------------------------|--|--|--------------|
| Sum of electronic and thermal Enthalpies= |  |  | -1586.386250 |
|-------------------------------------------|--|--|--------------|

|                                              |  |  |              |
|----------------------------------------------|--|--|--------------|
| Sum of electronic and thermal Free Energies= |  |  | -1586.476935 |
|----------------------------------------------|--|--|--------------|

|    |             |             |             |
|----|-------------|-------------|-------------|
| Pd | 0.64505200  | 0.09227000  | -0.11538200 |
| C  | -1.06292500 | -0.59289900 | 2.19495200  |
| C  | -1.09745200 | -0.34188000 | 0.87509700  |
| P  | 0.26484700  | 2.41933300  | 0.05117900  |
| P  | 1.31111300  | -2.18438900 | -0.09872700 |
| C  | 1.40705000  | 3.15440100  | 1.29026200  |
| H  | 1.10722700  | 2.81921200  | 2.28510000  |
| H  | 2.41663100  | 2.78462600  | 1.10767500  |
| H  | 1.38402400  | 4.24720500  | 1.25515900  |
| C  | -1.37205000 | 3.11175300  | 0.52114900  |
| H  | -1.65449100 | 2.72922700  | 1.50274600  |
| H  | -1.33533800 | 4.20383500  | 0.55444800  |
| H  | -2.12961200 | 2.79486100  | -0.19655500 |
| C  | 0.66573100  | 3.28847100  | -1.51882000 |
| H  | -0.09520700 | 3.04888100  | -2.26427800 |
| H  | 0.70684600  | 4.37200600  | -1.37947600 |
| H  | 1.62393900  | 2.91588200  | -1.88101900 |
| C  | 2.61276600  | -2.42082600 | 1.17821300  |
| H  | 3.36486900  | -1.63900600 | 1.06324900  |
| H  | 2.16106300  | -2.30627600 | 2.16564900  |
| H  | 3.06929500  | -3.41192800 | 1.10493000  |
| C  | 2.11272200  | -2.70814200 | -1.66931600 |
| H  | 2.81951000  | -1.93509800 | -1.96995600 |
| H  | 2.62430000  | -3.66774300 | -1.55773400 |
| H  | 1.35482500  | -2.79443800 | -2.45066600 |
| C  | 0.12308400  | -3.54714100 | 0.24628600  |
| H  | 0.63795700  | -4.51080000 | 0.28232700  |
| H  | -0.37117600 | -3.36038900 | 1.19984400  |
| H  | -0.64306800 | -3.57729200 | -0.52991000 |
| H  | -0.10176300 | -0.49608700 | 2.69834900  |
| C  | 3.54305600  | 0.74876600  | -0.65088600 |
| O  | 2.44084000  | 0.54128200  | -1.28001000 |
| O  | 3.73533800  | 0.72470800  | 0.56318400  |



|   |             |             |             |
|---|-------------|-------------|-------------|
| H | 4.39106800  | 0.97195800  | -1.33517900 |
| C | -2.18155700 | -1.05611500 | 3.10073300  |
| H | -3.04767700 | -1.42123500 | 2.54755000  |
| H | -1.82739400 | -1.86437400 | 3.75012100  |
| H | -2.52404500 | -0.25513900 | 3.76838700  |
| C | -2.32291000 | -0.36789000 | 0.04103200  |
| C | -2.30445500 | -0.90105700 | -1.26092500 |
| C | -3.54024000 | 0.17858700  | 0.49066000  |
| C | -3.44672500 | -0.92826200 | -2.05399200 |
| H | -1.36986900 | -1.28231100 | -1.65479600 |
| C | -4.68306500 | 0.16116000  | -0.30522100 |
| H | -3.58504100 | 0.63904800  | 1.46962000  |
| C | -4.64643900 | -0.40003400 | -1.57952900 |
| H | -3.39757100 | -1.35378800 | -3.05060700 |
| H | -5.60414600 | 0.59322800  | 0.07153300  |
| H | -5.53589000 | -0.41391300 | -2.19925500 |

### Com2<sub>ph</sub>-a

|                                              |             |             |                             |
|----------------------------------------------|-------------|-------------|-----------------------------|
| Zero-point correction=                       |             |             | 0.399194 (Hartree/Particle) |
| Thermal correction to Energy=                |             |             | 0.428925                    |
| Thermal correction to Enthalpy=              |             |             | 0.429869                    |
| Thermal correction to Gibbs Free Energy=     |             |             | 0.337667                    |
| Sum of electronic and zero-point Energies=   |             |             | -1586.396258                |
| Sum of electronic and thermal Energies=      |             |             | -1586.366527                |
| Sum of electronic and thermal Enthalpies=    |             |             | -1586.365583                |
| Sum of electronic and thermal Free Energies= |             |             | -1586.457786                |
| Pd                                           | -0.62018400 | 0.05910200  | 0.18493400                  |
| C                                            | 1.49587100  | -0.65300000 | 2.16928700                  |
| C                                            | 1.30807200  | -0.36669400 | 0.87262200                  |
| P                                            | -1.23504800 | -2.22981100 | 0.07889700                  |
| P                                            | -0.29606200 | 2.39624600  | 0.29172100                  |
| C                                            | -2.69911500 | -2.58562100 | 1.13398500                  |
| H                                            | -2.46911500 | -2.35872700 | 2.17636400                  |
| H                                            | -3.51882400 | -1.94919500 | 0.79789500                  |
| H                                            | -2.99281900 | -3.63565300 | 1.04978000                  |
| C                                            | -0.02680300 | -3.52947300 | 0.56521000                  |
| H                                            | 0.31176600  | -3.34935400 | 1.58581300                  |
| H                                            | -0.48183800 | -4.52122200 | 0.49921000                  |
| H                                            | 0.84616100  | -3.48679800 | -0.08759700                 |
| C                                            | -1.79565600 | -2.75838400 | -1.59129100                 |
| H                                            | -0.98681200 | -2.63941700 | -2.31419400                 |
| H                                            | -2.11705800 | -3.80345400 | -1.58096900                 |
| H                                            | -2.63271100 | -2.12161700 | -1.88039200                 |
| C                                            | -0.49227000 | 3.20520900  | -1.34665300                 |

|   |             |             |             |
|---|-------------|-------------|-------------|
| H | 0.25704800  | 2.81706700  | -2.03854300 |
| H | -1.48864700 | 2.96892900  | -1.72286100 |
| H | -0.38063500 | 4.28981300  | -1.26293000 |
| C | 1.28355700  | 3.08417400  | 0.93229800  |
| H | 2.10866900  | 2.76003300  | 0.29736700  |
| H | 1.24687300  | 4.17668100  | 0.94891200  |
| H | 1.46182300  | 2.71026700  | 1.94136300  |
| C | -1.57281700 | 3.21687100  | 1.32992300  |
| H | -1.42674300 | 4.30046900  | 1.34181800  |
| H | -2.55192600 | 2.98546100  | 0.90910600  |
| H | -1.51901100 | 2.83516100  | 2.35097300  |
| C | -3.49006200 | 0.68171700  | -0.87575900 |
| O | -3.59561900 | 1.87734400  | -1.00457100 |
| O | -4.07650800 | -0.36500600 | -1.01181900 |
| H | -2.23672800 | 0.41207500  | -0.38998300 |
| H | 0.63245600  | -0.59883400 | 2.83173800  |
| C | 2.37554200  | -0.32379700 | -0.15030100 |
| C | 2.19880800  | -0.90740700 | -1.41828300 |
| C | 3.59476100  | 0.34132200  | 0.08475300  |
| C | 3.19664200  | -0.86250300 | -2.38616300 |
| H | 1.25732100  | -1.39361500 | -1.64408300 |
| C | 4.59097000  | 0.39641100  | -0.88687400 |
| H | 3.75481600  | 0.82806500  | 1.03916200  |
| C | 4.40108200  | -0.21006000 | -2.12651400 |
| H | 3.03005700  | -1.33037100 | -3.35050100 |
| H | 5.51827300  | 0.91769400  | -0.67392700 |
| H | 5.17614000  | -0.16718200 | -2.88319000 |
| C | 2.76476400  | -1.10716300 | 2.85524100  |
| H | 2.56214400  | -1.98458300 | 3.47977500  |
| H | 3.55189900  | -1.36977900 | 2.14787900  |
| H | 3.15951200  | -0.33543200 | 3.52801900  |

### TS2<sub>Ph-a</sub>

|                                              |             |             |                             |
|----------------------------------------------|-------------|-------------|-----------------------------|
| Zero-point correction=                       |             |             | 0.398272 (Hartree/Particle) |
| Thermal correction to Energy=                |             |             | 0.427515                    |
| Thermal correction to Enthalpy=              |             |             | 0.428460                    |
| Thermal correction to Gibbs Free Energy=     |             |             | 0.337094                    |
| Sum of electronic and zero-point Energies=   |             |             | -1586.397023                |
| Sum of electronic and thermal Energies=      |             |             | -1586.367780                |
| Sum of electronic and thermal Enthalpies=    |             |             | -1586.366835                |
| Sum of electronic and thermal Free Energies= |             |             | -1586.458201                |
| Pd                                           | -0.62118300 | 0.05353000  | 0.18197400                  |
| C                                            | 1.52311400  | -0.64176900 | 2.16654200                  |
| C                                            | 1.32576800  | -0.35518400 | 0.87044400                  |

|   |             |             |             |
|---|-------------|-------------|-------------|
| P | -1.21082000 | -2.23427100 | 0.07750000  |
| P | -0.32056400 | 2.38636800  | 0.28950900  |
| C | -2.65541900 | -2.62098100 | 1.15012000  |
| H | -2.41247400 | -2.39694600 | 2.19021700  |
| H | -3.49221000 | -1.99667400 | 0.83565300  |
| H | -2.93314300 | -3.67523900 | 1.06442600  |
| C | 0.01683000  | -3.52291900 | 0.54670800  |
| H | 0.37042900  | -3.33635100 | 1.56096200  |
| H | -0.42874100 | -4.51961300 | 0.48960600  |
| H | 0.87904300  | -3.47232000 | -0.11965600 |
| C | -1.78030200 | -2.77633100 | -1.58646900 |
| H | -0.97852100 | -2.64689900 | -2.31553700 |
| H | -2.08502800 | -3.82634700 | -1.57165300 |
| H | -2.62796100 | -2.15449300 | -1.87541600 |
| C | -0.54029700 | 3.20927800  | -1.34012700 |
| H | 0.20524400  | 2.83137500  | -2.04174500 |
| H | -1.53666900 | 2.97084800  | -1.71368600 |
| H | -0.43384100 | 4.29386100  | -1.24925800 |
| C | 1.26316700  | 3.08489900  | 0.90923500  |
| H | 2.08125800  | 2.76539100  | 0.26292100  |
| H | 1.22101200  | 4.17721700  | 0.92868700  |
| H | 1.45762200  | 2.70888500  | 1.91446400  |
| C | -1.58187000 | 3.20158800  | 1.35226600  |
| H | -1.43915700 | 4.28561800  | 1.36586900  |
| H | -2.56960600 | 2.96915100  | 0.95389400  |
| H | -1.50719800 | 2.81659400  | 2.37079400  |
| C | -3.59617300 | 0.66815400  | -0.88160200 |
| O | -3.66645100 | 1.85717800  | -0.98405300 |
| O | -4.12699600 | -0.39718600 | -0.99634600 |
| H | -2.20787500 | 0.38247700  | -0.37415200 |
| H | 0.66152900  | -0.59693000 | 2.83281200  |
| C | 2.39563500  | -0.30458700 | -0.15017600 |
| C | 2.22330700  | -0.88864100 | -1.41893000 |
| C | 3.60991200  | 0.37094600  | 0.08229400  |
| C | 3.21961400  | -0.83553900 | -2.38806900 |
| H | 1.28517900  | -1.38205400 | -1.64382700 |
| C | 4.60423200  | 0.43559300  | -0.89079200 |
| H | 3.76716500  | 0.85920600  | 1.03648100  |
| C | 4.41876400  | -0.17257400 | -2.13032900 |
| H | 3.05582600  | -1.30491200 | -3.35228500 |
| H | 5.52709500  | 0.96531300  | -0.67886700 |
| H | 5.19253100  | -0.12282600 | -2.88797200 |
| C | 2.79756900  | -1.08541900 | 2.84994800  |
| H | 2.60435500  | -1.96478300 | 3.47502300  |

|   |            |             |            |
|---|------------|-------------|------------|
| H | 3.58553500 | -1.34146100 | 2.14091900 |
| H | 3.18825000 | -0.31092900 | 3.52220500 |

### M3<sub>ph-a</sub>

Zero-point correction= 0.398098 (Hartree/Particle)

|                                              |              |
|----------------------------------------------|--------------|
| Thermal correction to Energy=                | 0.428865     |
| Thermal correction to Enthalpy=              | 0.429810     |
| Thermal correction to Gibbs Free Energy=     | 0.330854     |
| Sum of electronic and zero-point Energies=   | -1586.407586 |
| Sum of electronic and thermal Energies=      | -1586.376818 |
| Sum of electronic and thermal Enthalpies=    | -1586.375874 |
| Sum of electronic and thermal Free Energies= | -1586.474829 |

|    |             |             |             |
|----|-------------|-------------|-------------|
| Pd | -0.55694900 | -0.07781500 | 0.42047300  |
| C  | 1.93898500  | -1.06226600 | 1.89378700  |
| C  | 1.52378600  | -0.51771300 | 0.73706800  |
| P  | -1.17714200 | -2.30274600 | 0.06951600  |
| P  | -0.28554400 | 2.21705100  | 0.74688700  |
| C  | -2.47831800 | -2.88166900 | 1.24041700  |
| H  | -2.10130800 | -2.81460500 | 2.26256300  |
| H  | -3.34734800 | -2.22892600 | 1.15346700  |
| H  | -2.77135000 | -3.91477700 | 1.03314100  |
| C  | 0.08269900  | -3.64170000 | 0.19512600  |
| H  | 0.55771900  | -3.60036400 | 1.17565900  |
| H  | -0.37165000 | -4.62507000 | 0.04505100  |
| H  | 0.86126900  | -3.48100100 | -0.55195600 |
| C  | -1.94288100 | -2.63724300 | -1.57384800 |
| H  | -1.22245500 | -2.41925800 | -2.36456700 |
| H  | -2.25788200 | -3.68113800 | -1.65822600 |
| H  | -2.80519900 | -1.98342100 | -1.70562700 |
| C  | -0.29109700 | 3.17112200  | -0.82892200 |
| H  | 0.51974100  | 2.81484900  | -1.46634600 |
| H  | -1.23855700 | 3.00246300  | -1.34200700 |
| H  | -0.16364300 | 4.24170200  | -0.64516300 |
| C  | 1.23230400  | 2.83453500  | 1.58595800  |
| H  | 2.10579100  | 2.56391300  | 0.99253900  |
| H  | 1.19816800  | 3.92050100  | 1.70997300  |
| H  | 1.32590100  | 2.35739200  | 2.56249100  |
| C  | -1.62550000 | 3.02660100  | 1.71950700  |
| H  | -1.44503300 | 4.09965500  | 1.83039000  |
| H  | -2.57597700 | 2.86484300  | 1.21102000  |
| H  | -1.68271600 | 2.56816500  | 2.70841700  |
| C  | -4.25262600 | 1.08809200  | -1.32770800 |
| O  | -3.95878800 | 2.20146800  | -1.17860600 |
| O  | -4.58649300 | -0.00970900 | -1.50145800 |

|   |             |             |             |
|---|-------------|-------------|-------------|
| H | -2.13666700 | 0.24504600  | 0.19000300  |
| H | 1.19344200  | -1.21842500 | 2.67574300  |
| C | 2.43964100  | -0.19820400 | -0.38093200 |
| C | 2.10682700  | -0.53576300 | -1.70746800 |
| C | 3.64123600  | 0.51444100  | -0.19190600 |
| C | 2.93802000  | -0.21563300 | -2.77600000 |
| H | 1.17069300  | -1.05090800 | -1.89158700 |
| C | 4.46774500  | 0.85093000  | -1.26187800 |
| H | 3.92242700  | 0.81307100  | 0.81147600  |
| C | 4.12621800  | 0.48270200  | -2.56143300 |
| H | 2.65329000  | -0.50369600 | -3.78285600 |
| H | 5.38409700  | 1.40269600  | -1.07800000 |
| H | 4.77013300  | 0.74202200  | -3.39432600 |
| C | 3.31736900  | -1.55956900 | 2.27274000  |
| H | 3.25601900  | -2.57245000 | 2.68905100  |
| H | 4.00113900  | -1.58688200 | 1.42327800  |
| H | 3.77571100  | -0.93655200 | 3.05204800  |

#### M4<sub>ph</sub>-a

|                                              |             |             |                             |
|----------------------------------------------|-------------|-------------|-----------------------------|
| Zero-point correction=                       |             |             | 0.385867 (Hartree/Particle) |
| Thermal correction to Energy=                |             |             | 0.412198                    |
| Thermal correction to Enthalpy=              |             |             | 0.413142                    |
| Thermal correction to Gibbs Free Energy=     |             |             | 0.326393                    |
| Sum of electronic and zero-point Energies=   |             |             | -1397.774228                |
| Sum of electronic and thermal Energies=      |             |             | -1397.747897                |
| Sum of electronic and thermal Enthalpies=    |             |             | -1397.746953                |
| Sum of electronic and thermal Free Energies= |             |             | -1397.833702                |
| Pd                                           | -0.85800200 | 0.68638500  | 0.13002400                  |
| C                                            | 0.15518700  | -1.17652400 | -2.11729200                 |
| C                                            | 0.41273500  | -0.76096700 | -0.86431400                 |
| P                                            | 0.73599200  | 2.37828600  | -0.04685000                 |
| P                                            | -2.63862900 | -0.80722600 | 0.32386700                  |
| C                                            | 1.61402500  | 2.51481800  | -1.66066300                 |
| H                                            | 2.10334600  | 1.56683900  | -1.88307400                 |
| H                                            | 0.88710500  | 2.71251800  | -2.45049400                 |
| H                                            | 2.35550300  | 3.31855700  | -1.64258600                 |
| C                                            | 2.11611700  | 2.24155200  | 1.16576000                  |
| H                                            | 2.62032600  | 1.28320000  | 1.03609100                  |
| H                                            | 2.83584600  | 3.05474600  | 1.03569200                  |
| H                                            | 1.70884600  | 2.28004000  | 2.17753100                  |
| C                                            | 0.14097400  | 4.10272100  | 0.21671900                  |
| H                                            | -0.29654900 | 4.17707500  | 1.21290000                  |
| H                                            | 0.95197900  | 4.82950600  | 0.11404800                  |
| H                                            | -0.64158300 | 4.32641700  | -0.51008500                 |

|   |             |             |             |
|---|-------------|-------------|-------------|
| C | -3.89240600 | -0.46291800 | 1.63084100  |
| H | -3.40704900 | -0.47948600 | 2.60828500  |
| H | -4.29823900 | 0.53737900  | 1.47639700  |
| H | -4.70175700 | -1.19844600 | 1.61576600  |
| C | -2.28552900 | -2.59663500 | 0.59350300  |
| H | -1.81959400 | -2.73623900 | 1.57062800  |
| H | -3.20286500 | -3.19054700 | 0.54945000  |
| H | -1.58546000 | -2.93829200 | -0.16905700 |
| C | -3.65981000 | -0.83938700 | -1.21070500 |
| H | -4.50280700 | -1.52935800 | -1.11344500 |
| H | -4.03519900 | 0.16443300  | -1.41516700 |
| H | -3.03424700 | -1.15104600 | -2.04851400 |
| H | -0.68738800 | -0.72070800 | -2.64083600 |
| H | -1.80518500 | 1.76524500  | 0.87134800  |
| C | 1.57625200  | -1.24556400 | -0.08747700 |
| C | 2.88745900  | -1.21284600 | -0.60295700 |
| C | 1.42956700  | -1.68217800 | 1.24355100  |
| C | 3.98376800  | -1.60828600 | 0.16158100  |
| H | 3.04528300  | -0.86489600 | -1.61769000 |
| C | 2.51954600  | -2.09268600 | 2.00321100  |
| H | 0.43817700  | -1.68520200 | 1.68091700  |
| C | 3.80769000  | -2.05695900 | 1.46855300  |
| H | 4.97955900  | -1.56699700 | -0.26808400 |
| H | 2.36615400  | -2.43271900 | 3.02231600  |
| H | 4.65923500  | -2.36674900 | 2.06386700  |
| C | 0.85730200  | -2.24363100 | -2.92990600 |
| H | 0.12846500  | -2.94967600 | -3.34582400 |
| H | 1.39092000  | -1.81546800 | -3.78855800 |
| H | 1.57760100  | -2.81281100 | -2.34061900 |

#### M4<sub>ph</sub>-b

|                                              |             |             |                             |
|----------------------------------------------|-------------|-------------|-----------------------------|
| Zero-point correction=                       |             |             | 0.385852 (Hartree/Particle) |
| Thermal correction to Energy=                |             |             | 0.412323                    |
| Thermal correction to Enthalpy=              |             |             | 0.413267                    |
| Thermal correction to Gibbs Free Energy=     |             |             | 0.327659                    |
| Sum of electronic and zero-point Energies=   |             |             | -1397.772542                |
| Sum of electronic and thermal Energies=      |             |             | -1397.746072                |
| Sum of electronic and thermal Enthalpies=    |             |             | -1397.745128                |
| Sum of electronic and thermal Free Energies= |             |             | -1397.830735                |
| Pd                                           | -0.60271500 | -0.30277600 | 0.41579400                  |
| C                                            | 1.65675500  | 0.31566000  | 2.31542300                  |
| C                                            | 1.37977600  | -0.13399500 | 1.08076800                  |
| P                                            | -2.81727100 | -1.04927700 | -0.05264900                 |
| P                                            | -0.54496600 | 1.95992800  | -0.52050200                 |

|   |             |             |             |
|---|-------------|-------------|-------------|
| C | -3.15539100 | -2.79474500 | 0.44227400  |
| H | -2.47106100 | -3.45546000 | -0.09239800 |
| H | -2.95705500 | -2.90556400 | 1.50929500  |
| H | -4.18755500 | -3.08733700 | 0.22785100  |
| C | -3.41095100 | -1.05412700 | -1.80587700 |
| H | -2.71956100 | -1.63501600 | -2.41921500 |
| H | -4.41236500 | -1.48547500 | -1.89096900 |
| H | -3.43105700 | -0.03391700 | -2.19223700 |
| C | -4.18998300 | -0.15543500 | 0.80773500  |
| H | -4.20454200 | 0.88919900  | 0.49204700  |
| H | -5.16361300 | -0.60605400 | 0.59461300  |
| H | -4.01291400 | -0.18059800 | 1.88454700  |
| C | -2.03947200 | 2.79308000  | -1.23700700 |
| H | -2.41528200 | 2.21532200  | -2.08389900 |
| H | -2.82774800 | 2.84974300  | -0.48327900 |
| H | -1.81028400 | 3.80587700  | -1.58051600 |
| C | 0.66192300  | 2.15055600  | -1.90277100 |
| H | 0.34315300  | 1.53419600  | -2.74586100 |
| H | 0.74349900  | 3.19133000  | -2.22900700 |
| H | 1.63903100  | 1.78986900  | -1.57981400 |
| C | 0.01969500  | 3.23657700  | 0.68543700  |
| H | 0.18356600  | 4.20421400  | 0.20329600  |
| H | -0.73148800 | 3.34950100  | 1.47023300  |
| H | 0.94291800  | 2.89147600  | 1.15197100  |
| H | 0.82080700  | 0.61475600  | 2.94635700  |
| H | -0.37419000 | -1.69723500 | 1.10559400  |
| C | 2.42222800  | -0.57723500 | 0.12569800  |
| C | 2.35376500  | -1.83870200 | -0.49308300 |
| C | 3.50187800  | 0.25423900  | -0.22744800 |
| C | 3.32929900  | -2.25868300 | -1.39066300 |
| H | 1.51734100  | -2.48417800 | -0.25278700 |
| C | 4.47180900  | -0.15954000 | -1.13907500 |
| H | 3.57725600  | 1.23801500  | 0.22317900  |
| C | 4.39420500  | -1.42092900 | -1.72402000 |
| H | 3.25555400  | -3.24406700 | -1.83949400 |
| H | 5.29143100  | 0.50631400  | -1.38956000 |
| H | 5.14823000  | -1.74546200 | -2.43256500 |
| C | 2.99972800  | 0.39332800  | 3.00569400  |
| H | 2.95468600  | -0.11905200 | 3.97413000  |
| H | 3.79901600  | -0.06335800 | 2.42109700  |
| H | 3.28909500  | 1.43058600  | 3.21960900  |

**TS3<sub>Ph</sub>**

Zero-point correction=

0.383778 (Hartree/Particle)

|                                              |             |             |              |
|----------------------------------------------|-------------|-------------|--------------|
| Thermal correction to Energy=                |             |             | 0.410366     |
| Thermal correction to Enthalpy=              |             |             | 0.411310     |
| Thermal correction to Gibbs Free Energy=     |             |             | 0.324131     |
| Sum of electronic and zero-point Energies=   |             |             | -1397.768091 |
| Sum of electronic and thermal Energies=      |             |             | -1397.741503 |
| Sum of electronic and thermal Enthalpies=    |             |             | -1397.740559 |
| Sum of electronic and thermal Free Energies= |             |             | -1397.827738 |
| Pd                                           | -0.59244100 | -0.24638400 | 0.37856000   |
| C                                            | 1.69366500  | -0.11619100 | 2.43280800   |
| C                                            | 1.38121200  | -0.40749400 | 1.15796600   |
| P                                            | -2.74942000 | -1.13447500 | -0.11610300  |
| P                                            | -0.59199300 | 2.08995700  | -0.37351800  |
| C                                            | -2.97607000 | -2.93302400 | 0.25401900   |
| H                                            | -2.24929700 | -3.50815000 | -0.32262500  |
| H                                            | -2.77268800 | -3.10680100 | 1.31209400   |
| H                                            | -3.98544200 | -3.28256700 | 0.01528100   |
| C                                            | -3.35244900 | -1.06547000 | -1.86703100  |
| H                                            | -2.63134900 | -1.56548500 | -2.51660700  |
| H                                            | -4.32901300 | -1.54520000 | -1.98138400  |
| H                                            | -3.42779500 | -0.02454700 | -2.18676700  |
| C                                            | -4.19183100 | -0.40522200 | 0.78927700   |
| H                                            | -4.28027600 | 0.65442200  | 0.54236900   |
| H                                            | -5.12984500 | -0.90942400 | 0.53802800   |
| H                                            | -4.01950300 | -0.48744300 | 1.86414700   |
| C                                            | -2.13331200 | 3.02233400  | -0.82334900  |
| H                                            | -2.62686000 | 2.53097100  | -1.66496300  |
| H                                            | -2.82266700 | 3.01841900  | 0.02385700   |
| H                                            | -1.91900100 | 4.05935400  | -1.09873500  |
| C                                            | 0.45890800  | 2.43074100  | -1.85753200  |
| H                                            | 0.03674400  | 1.91842600  | -2.72459500  |
| H                                            | 0.52531500  | 3.50164600  | -2.07249200  |
| H                                            | 1.46019200  | 2.03051900  | -1.69018500  |
| C                                            | 0.14382800  | 3.23353100  | 0.87892500   |
| H                                            | 0.27208400  | 4.24678900  | 0.48718900   |
| H                                            | -0.50330500 | 3.26849700  | 1.75796100   |
| H                                            | 1.10912900  | 2.83551300  | 1.19505900   |
| H                                            | 0.87234700  | 0.03288300  | 3.13092700   |
| H                                            | 0.08896200  | -1.49998700 | 1.08116100   |
| C                                            | 2.38898100  | -0.66574400 | 0.10269100   |
| C                                            | 2.38611800  | -1.86462900 | -0.63096600  |
| C                                            | 3.36816800  | 0.29009300  | -0.22237500  |
| C                                            | 3.33100200  | -2.10642500 | -1.62275500  |
| H                                            | 1.62908900  | -2.60818600 | -0.41036400  |
| C                                            | 4.30830400  | 0.05288100  | -1.22310000  |



|   |            |             |             |
|---|------------|-------------|-------------|
| H | 3.38884600 | 1.22885900  | 0.32025900  |
| C | 4.29767000 | -1.14857400 | -1.92799200 |
| H | 3.31069600 | -3.04667800 | -2.16397700 |
| H | 5.05294700 | 0.80900700  | -1.44979300 |
| H | 5.02917100 | -1.33529100 | -2.70626200 |
| C | 3.06636800 | -0.02153400 | 3.05195500  |
| H | 3.12284800 | -0.65103200 | 3.94807400  |
| H | 3.85549200 | -0.33585300 | 2.36797600  |
| H | 3.29328000 | 1.00112900  | 3.37969700  |

### M5<sub>ph</sub>

|                                              |             |             |                             |
|----------------------------------------------|-------------|-------------|-----------------------------|
| Zero-point correction=                       |             |             | 0.389773 (Hartree/Particle) |
| Thermal correction to Energy=                |             |             | 0.416949                    |
| Thermal correction to Enthalpy=              |             |             | 0.417893                    |
| Thermal correction to Gibbs Free Energy=     |             |             | 0.326357                    |
| Sum of electronic and zero-point Energies=   |             |             | -1397.812725                |
| Sum of electronic and thermal Energies=      |             |             | -1397.785549                |
| Sum of electronic and thermal Enthalpies=    |             |             | -1397.784605                |
| Sum of electronic and thermal Free Energies= |             |             | -1397.876141                |
| Pd                                           | -1.59295600 | 0.17868000  | -0.01640200                 |
| C                                            | 2.49610300  | -1.56800700 | 2.18758500                  |
| C                                            | 2.13942000  | -0.74273200 | 1.19179500                  |
| P                                            | -2.07595900 | -2.05756800 | -0.42070800                 |
| P                                            | -1.26840600 | 2.44310500  | 0.40731900                  |
| C                                            | -0.67373000 | -3.23442900 | -0.69749600                 |
| H                                            | -0.10647500 | -2.92026200 | -1.57564400                 |
| H                                            | 0.00129300  | -3.20710400 | 0.15965600                  |
| H                                            | -1.02941000 | -4.25850000 | -0.84774000                 |
| C                                            | -3.13287600 | -2.42623800 | -1.89645600                 |
| H                                            | -2.63078700 | -2.07028400 | -2.79800300                 |
| H                                            | -3.33372900 | -3.49767500 | -1.99603400                 |
| H                                            | -4.07902100 | -1.88958300 | -1.80645600                 |
| C                                            | -3.01585800 | -2.93981000 | 0.90965200                  |
| H                                            | -3.95457700 | -2.41529000 | 1.09650400                  |
| H                                            | -3.23037100 | -3.97801100 | 0.63716500                  |
| H                                            | -2.43450800 | -2.92449100 | 1.83337900                  |
| C                                            | -2.77050100 | 3.40092100  | 0.91414000                  |
| H                                            | -3.53038600 | 3.32196100  | 0.13466800                  |
| H                                            | -3.18219100 | 2.96866900  | 1.82795500                  |
| H                                            | -2.53902900 | 4.45667300  | 1.08714000                  |
| C                                            | -0.63872500 | 3.48673600  | -0.98643200                 |
| H                                            | -1.32319600 | 3.40950900  | -1.83324400                 |
| H                                            | -0.54149100 | 4.53777800  | -0.69687600                 |
| H                                            | 0.33540000  | 3.11128900  | -1.30494800                 |

|   |             |             |             |
|---|-------------|-------------|-------------|
| C | -0.08805500 | 2.90929100  | 1.75545700  |
| H | -0.02442700 | 3.99456100  | 1.88198600  |
| H | -0.41561900 | 2.45781000  | 2.69380300  |
| H | 0.90308600  | 2.51628900  | 1.52210600  |
| H | 1.72425100  | -1.79785300 | 2.91914500  |
| H | 1.09861700  | -0.42007600 | 1.17109300  |
| C | 2.93808300  | -0.23627000 | 0.06161700  |
| C | 2.26823200  | 0.07997200  | -1.13446200 |
| C | 4.32356100  | -0.00849700 | 0.11759500  |
| C | 2.95995200  | 0.56153700  | -2.24085600 |
| H | 1.19035700  | -0.05241000 | -1.17941300 |
| C | 5.01385400  | 0.47896300  | -0.98916400 |
| H | 4.86119100  | -0.18160500 | 1.04074300  |
| C | 4.33913000  | 0.75741000  | -2.17587700 |
| H | 2.42079900  | 0.78904000  | -3.15425300 |
| H | 6.08255300  | 0.65133600  | -0.92012800 |
| H | 4.87985000  | 1.13594300  | -3.03614400 |
| C | 3.81245800  | -2.25451200 | 2.41883800  |
| H | 3.64798400  | -3.26582700 | 2.80281300  |
| H | 4.40991400  | -2.32977300 | 1.50888700  |
| H | 4.41506900  | -1.73044200 | 3.17154200  |

**(Z)-1-phenylpropene**

Zero-point correction= 0.161112 (Hartree/Particle)

|                                              |             |             |             |
|----------------------------------------------|-------------|-------------|-------------|
| Thermal correction to Energy=                | 0.169267    |             |             |
| Thermal correction to Enthalpy=              | 0.170211    |             |             |
| Thermal correction to Gibbs Free Energy=     | 0.127886    |             |             |
| Sum of electronic and zero-point Energies=   | -348.891566 |             |             |
| Sum of electronic and thermal Energies=      | -348.883410 |             |             |
| Sum of electronic and thermal Enthalpies=    | -348.882466 |             |             |
| Sum of electronic and thermal Free Energies= | -348.924791 |             |             |
| C                                            | 1.39064000  | -1.00261200 | -0.38805500 |
| C                                            | 2.58020900  | -0.45443000 | -0.10479100 |
| C                                            | 2.87066200  | 0.87701300  | 0.52537200  |
| H                                            | 3.66847300  | 0.77468800  | 1.26758400  |
| H                                            | 3.22761200  | 1.60243000  | -0.21616700 |
| H                                            | 1.99768100  | 1.30500900  | 1.01945200  |
| H                                            | 1.40073200  | -2.01806100 | -0.77843700 |
| C                                            | 0.04035600  | -0.43788300 | -0.20437900 |
| C                                            | -1.01311700 | -1.29880600 | 0.14596900  |
| C                                            | -0.26055200 | 0.91942400  | -0.40169100 |
| C                                            | -2.30536300 | -0.82003300 | 0.32969000  |
| H                                            | -0.80652900 | -2.35523800 | 0.28373400  |
| C                                            | -1.55547700 | 1.39881300  | -0.22330200 |

|   |             |             |             |
|---|-------------|-------------|-------------|
| H | 0.51663900  | 1.59797800  | -0.72954000 |
| C | -2.58209000 | 0.53444500  | 0.15012000  |
| H | -3.09890500 | -1.50455300 | 0.60862900  |
| H | -1.76466900 | 2.45025400  | -0.38759000 |
| H | -3.58989800 | 0.90965600  | 0.28749600  |
| H | 3.45724600  | -1.05774800 | -0.32875600 |

**TS1<sub>Me'</sub>-a**

|                                              |             |             |                             |
|----------------------------------------------|-------------|-------------|-----------------------------|
| Zero-point correction=                       |             |             | 0.395608 (Hartree/Particle) |
| Thermal correction to Energy=                |             |             | 0.425912                    |
| Thermal correction to Enthalpy=              |             |             | 0.426857                    |
| Thermal correction to Gibbs Free Energy=     |             |             | 0.330908                    |
| Sum of electronic and zero-point Energies=   |             |             | -1586.350959                |
| Sum of electronic and thermal Energies=      |             |             | -1586.320655                |
| Sum of electronic and thermal Enthalpies=    |             |             | -1586.319710                |
| Sum of electronic and thermal Free Energies= |             |             | -1586.415659                |
| Pd                                           | 0.66079700  | 0.00920000  | 0.23969000                  |
| C                                            | -1.48619800 | -0.84511200 | 1.22649000                  |
| C                                            | -0.29310500 | -0.89156900 | 1.78005900                  |
| P                                            | 2.77618100  | -0.93666700 | 0.10410300                  |
| P                                            | 0.46031200  | 2.01794700  | -1.17873600                 |
| C                                            | 3.28885000  | -1.45201500 | -1.59504900                 |
| H                                            | 2.59294200  | -2.20375000 | -1.97132300                 |
| H                                            | 3.24828900  | -0.59073400 | -2.26368300                 |
| H                                            | 4.30190000  | -1.86520200 | -1.60050800                 |
| C                                            | 3.15230000  | -2.46357300 | 1.07790000                  |
| H                                            | 2.47594900  | -3.26361300 | 0.77118400                  |
| H                                            | 4.18577600  | -2.79290900 | 0.93413800                  |
| H                                            | 2.98407800  | -2.26734700 | 2.13822300                  |
| C                                            | 4.17181300  | 0.16678600  | 0.60546100                  |
| H                                            | 4.04746900  | 0.46115600  | 1.64908100                  |
| H                                            | 5.13850700  | -0.33169800 | 0.48695400                  |
| H                                            | 4.15870000  | 1.07202600  | -0.00374100                 |
| C                                            | -1.20689900 | 2.24034300  | -1.93301100                 |
| H                                            | -1.43790500 | 1.40123700  | -2.59161400                 |
| H                                            | -1.92914500 | 2.26021600  | -1.11542400                 |
| H                                            | -1.26423600 | 3.17425100  | -2.50033300                 |
| C                                            | 1.58375900  | 2.33588500  | -2.61976700                 |
| H                                            | 1.49348000  | 1.52319600  | -3.34394700                 |
| H                                            | 1.33891000  | 3.27922700  | -3.11661900                 |
| H                                            | 2.62105500  | 2.37881800  | -2.27981600                 |
| C                                            | 0.63548900  | 3.56489300  | -0.19144800                 |
| H                                            | 0.52328600  | 4.45364800  | -0.81977200                 |
| H                                            | -0.14729700 | 3.55150100  | 0.56972000                  |

|   |             |             |             |
|---|-------------|-------------|-------------|
| H | 1.61233200  | 3.59045100  | 0.29579200  |
| C | 0.18466800  | -0.99516900 | 3.18182900  |
| H | 1.10231500  | -0.43457000 | 3.36405900  |
| H | -0.60094600 | -0.62495900 | 3.84988100  |
| H | 0.36173900  | -2.04578900 | 3.44127800  |
| C | -2.75148600 | 2.01433600  | 2.21510800  |
| O | -2.02814000 | 2.38886500  | 1.29110200  |
| O | -3.00363800 | 0.81311800  | 2.59187600  |
| H | -3.27913700 | 2.77535800  | 2.83176700  |
| H | -2.23961000 | -0.08812200 | 1.92022200  |
| C | -2.09922000 | -1.34802600 | -0.00414200 |
| C | -3.31643700 | -0.80915500 | -0.45574400 |
| C | -1.54771100 | -2.43364800 | -0.71388900 |
| C | -3.94084000 | -1.31761500 | -1.58960200 |
| H | -3.76364400 | 0.00628600  | 0.09853900  |
| C | -2.18038900 | -2.94156800 | -1.84195000 |
| H | -0.62503500 | -2.87854500 | -0.35991600 |
| C | -3.37760000 | -2.38305200 | -2.29084900 |
| H | -4.87787800 | -0.88466900 | -1.92251400 |
| H | -1.74227500 | -3.78171000 | -2.37053600 |
| H | -3.87142100 | -2.78246100 | -3.16954000 |

### TS1<sub>Mc</sub>'w-a

|                                              |             |             |                             |
|----------------------------------------------|-------------|-------------|-----------------------------|
| Zero-point correction=                       |             |             | 0.421676 (Hartree/Particle) |
| Thermal correction to Energy=                |             |             | 0.454381                    |
| Thermal correction to Enthalpy=              |             |             | 0.455325                    |
| Thermal correction to Gibbs Free Energy=     |             |             | 0.354439                    |
| Sum of electronic and zero-point Energies=   |             |             | -1662.795215                |
| Sum of electronic and thermal Energies=      |             |             | -1662.762510                |
| Sum of electronic and thermal Enthalpies=    |             |             | -1662.761566                |
| Sum of electronic and thermal Free Energies= |             |             | -1662.862452                |
| Pd                                           | -0.74601400 | -0.18026500 | -0.32942300                 |
| C                                            | 2.09526900  | 0.42360800  | -0.79870300                 |
| C                                            | 0.99535300  | 0.22599200  | -1.45941900                 |
| P                                            | -2.44329400 | -1.47654100 | 1.01667100                  |
| P                                            | -1.61467000 | 1.88309000  | -0.88455200                 |
| C                                            | -4.18755500 | -0.93078300 | 1.33325100                  |
| H                                            | -4.18757200 | 0.00024300  | 1.90474200                  |
| H                                            | -4.69394500 | -0.74742200 | 0.38300400                  |
| H                                            | -4.75328900 | -1.68305400 | 1.89074600                  |
| C                                            | -1.90253100 | -1.95071600 | 2.72130900                  |
| H                                            | -1.76828500 | -1.05536800 | 3.33161500                  |
| H                                            | -2.62581500 | -2.61126600 | 3.20857200                  |
| H                                            | -0.94343100 | -2.46495800 | 2.64788500                  |

|   |             |             |             |
|---|-------------|-------------|-------------|
| C | -2.71112200 | -3.13395700 | 0.24492000  |
| H | -1.73678300 | -3.60662700 | 0.11488300  |
| H | -3.35058500 | -3.77401900 | 0.85987500  |
| H | -3.16838900 | -3.01203800 | -0.73916700 |
| C | -1.87803900 | 2.92428800  | 0.61797700  |
| H | -2.50895400 | 2.38616200  | 1.32702700  |
| H | -0.91647900 | 3.11094800  | 1.09773300  |
| H | -2.35201600 | 3.87748100  | 0.36537900  |
| C | -3.30847900 | 1.84629900  | -1.62550400 |
| H | -3.27475400 | 1.32855000  | -2.58583400 |
| H | -3.98443600 | 1.29889100  | -0.96738600 |
| H | -3.69816400 | 2.85713800  | -1.77840800 |
| C | -0.76575400 | 3.07215800  | -2.01485800 |
| H | 0.25680500  | 3.23582200  | -1.67534700 |
| H | -0.72030500 | 2.65508700  | -3.02184700 |
| H | -1.30032500 | 4.02597200  | -2.05072400 |
| C | 0.75812800  | -0.17792500 | -2.88790400 |
| H | 1.71523000  | -0.28686200 | -3.40718200 |
| H | 0.21844500  | -1.12733600 | -2.96088000 |
| H | 0.16710100  | 0.56896400  | -3.42556500 |
| C | 3.61583900  | -2.36435800 | -1.82784700 |
| O | 3.90725900  | -1.11112300 | -1.97826300 |
| O | 0.56242000  | -2.14172200 | 0.39402000  |
| H | 4.33912000  | -3.01992500 | -2.34462800 |
| H | 3.16421800  | -0.41573900 | -1.49267000 |
| C | 2.42648800  | 0.86252700  | 0.54515200  |
| C | 3.11581500  | 0.01122600  | 1.43602800  |
| C | 2.14408400  | 2.16935500  | 0.99363000  |
| C | 3.45796900  | 0.43052400  | 2.71747200  |
| H | 3.39383700  | -0.98388500 | 1.10515600  |
| C | 2.50160500  | 2.58911800  | 2.27097800  |
| H | 1.65877000  | 2.86117700  | 0.31508700  |
| C | 3.15171900  | 1.72154100  | 3.14806400  |
| H | 3.98071600  | -0.25165900 | 3.37991300  |
| H | 2.27527100  | 3.60381600  | 2.58317200  |
| H | 3.42976600  | 2.05054200  | 4.14272700  |
| O | 2.67988700  | -2.85858200 | -1.20833100 |
| H | 1.26054100  | -2.36214300 | -0.26718100 |
| H | 1.06055400  | -1.68653400 | 1.08430900  |

**M2<sub>Me'</sub>-a**

|                                 |                             |
|---------------------------------|-----------------------------|
| Zero-point correction=          | 0.403256 (Hartree/Particle) |
| Thermal correction to Energy=   | 0.432469                    |
| Thermal correction to Enthalpy= | 0.433413                    |

|                                              |             |             |              |
|----------------------------------------------|-------------|-------------|--------------|
| Thermal correction to Gibbs Free Energy=     |             |             | 0.343664     |
| Sum of electronic and zero-point Energies=   |             |             | -1586.409322 |
| Sum of electronic and thermal Energies=      |             |             | -1586.380109 |
| Sum of electronic and thermal Enthalpies=    |             |             | -1586.379165 |
| Sum of electronic and thermal Free Energies= |             |             | -1586.468914 |
| Pd                                           | -0.64145000 | -0.03419600 | 0.58192400   |
| C                                            | 2.17952600  | -0.60649000 | 1.58093500   |
| C                                            | 0.90860400  | -0.32373500 | 1.89524900   |
| P                                            | 0.18422100  | 2.06076200  | 0.09237800   |
| P                                            | -2.66360800 | -0.05899900 | -0.86136200  |
| C                                            | 0.60070900  | 2.30321800  | -1.68533800  |
| H                                            | 1.39186500  | 1.60404700  | -1.96033300  |
| H                                            | -0.27177300 | 2.09530000  | -2.30607400  |
| H                                            | 0.93742500  | 3.32659200  | -1.87153300  |
| C                                            | 1.68719700  | 2.70258700  | 0.93346300   |
| H                                            | 2.54124500  | 2.07132000  | 0.69333200   |
| H                                            | 1.88356400  | 3.72749600  | 0.60657600   |
| H                                            | 1.54136900  | 2.68649900  | 2.01373600   |
| C                                            | -1.02549800 | 3.41202000  | 0.43564900   |
| H                                            | -1.27110000 | 3.41425100  | 1.49909900   |
| H                                            | -0.60866500 | 4.38557800  | 0.16345000   |
| H                                            | -1.94334100 | 3.24748100  | -0.12708100  |
| C                                            | -2.45385500 | -1.20233700 | -2.28949200  |
| H                                            | -1.75525000 | -0.75796100 | -3.00202400  |
| H                                            | -2.01178500 | -2.13191200 | -1.92876300  |
| H                                            | -3.40648200 | -1.39282000 | -2.79180000  |
| C                                            | -3.46361900 | 1.40691300  | -1.66748300  |
| H                                            | -2.75758000 | 1.91805800  | -2.32514300  |
| H                                            | -4.32639400 | 1.09562400  | -2.26288200  |
| H                                            | -3.80560900 | 2.11372300  | -0.90872100  |
| C                                            | -4.08005700 | -0.76756000 | 0.07843200   |
| H                                            | -4.90205400 | -1.05083300 | -0.58406800  |
| H                                            | -3.72317700 | -1.63287600 | 0.63548200   |
| H                                            | -4.43645700 | -0.02763400 | 0.79848500   |
| C                                            | 0.42706700  | -0.29631800 | 3.31971400   |
| H                                            | -0.38174300 | -1.01990900 | 3.45344100   |
| H                                            | 1.23554800  | -0.54209700 | 4.01990700   |
| H                                            | 0.02526500  | 0.68569200  | 3.59671300   |
| C                                            | -1.06709000 | -2.98529700 | 0.66841200   |
| O                                            | -1.36348200 | -1.91816100 | 1.32446700   |
| O                                            | -0.54426000 | -3.07021000 | -0.43897000  |
| H                                            | -1.35915500 | -3.90823300 | 1.21176500   |
| H                                            | 2.86515500  | -0.76947200 | 2.41785400   |
| C                                            | 2.82401400  | -0.67718000 | 0.25735400   |

|   |            |             |             |
|---|------------|-------------|-------------|
| C | 2.16382200 | -1.14187000 | -0.89373800 |
| C | 4.16760100 | -0.28021600 | 0.13107100  |
| C | 2.81726500 | -1.16295600 | -2.12449300 |
| H | 1.16055000 | -1.54574100 | -0.81063500 |
| C | 4.81580600 | -0.29850000 | -1.10037100 |
| H | 4.70512200 | 0.05048100  | 1.01495500  |
| C | 4.13906300 | -0.73280100 | -2.23929900 |
| H | 2.29514100 | -1.54613200 | -2.99512300 |
| H | 5.85080700 | 0.01923500  | -1.16979300 |
| H | 4.64362600 | -0.75910400 | -3.19894300 |

**M2<sub>Me</sub>'w-a**

|                                              |             |             |                             |
|----------------------------------------------|-------------|-------------|-----------------------------|
| Zero-point correction=                       |             |             | 0.427518 (Hartree/Particle) |
| Thermal correction to Energy=                |             |             | 0.459120                    |
| Thermal correction to Enthalpy=              |             |             | 0.460064                    |
| Thermal correction to Gibbs Free Energy=     |             |             | 0.362590                    |
| Sum of electronic and zero-point Energies=   |             |             | -1662.847240                |
| Sum of electronic and thermal Energies=      |             |             | -1662.815638                |
| Sum of electronic and thermal Enthalpies=    |             |             | -1662.814694                |
| Sum of electronic and thermal Free Energies= |             |             | -1662.912169                |
| Pd                                           | -0.39944300 | 0.00241900  | -0.15927900                 |
| C                                            | 1.86340100  | -1.98793700 | -0.51405900                 |
| C                                            | 0.63496100  | -1.60944900 | -0.90005000                 |
| P                                            | -1.88463500 | 1.64101700  | 0.95620900                  |
| P                                            | 0.71369000  | 1.36658900  | -1.64930300                 |
| C                                            | -1.63980500 | 3.47701900  | 0.96575400                  |
| H                                            | -0.65999200 | 3.71856800  | 1.38283200                  |
| H                                            | -1.69228100 | 3.87847800  | -0.04830600                 |
| H                                            | -2.40596200 | 3.96835300  | 1.57164600                  |
| C                                            | -1.95024800 | 1.25143100  | 2.75214200                  |
| H                                            | -1.00742000 | 1.54463200  | 3.21896000                  |
| H                                            | -2.77575300 | 1.76965200  | 3.24692000                  |
| H                                            | -2.05622700 | 0.17085800  | 2.84998400                  |
| C                                            | -3.63965000 | 1.48680300  | 0.41784000                  |
| H                                            | -3.94841100 | 0.44414900  | 0.51237000                  |
| H                                            | -4.29578200 | 2.11895000  | 1.02279600                  |
| H                                            | -3.72808700 | 1.77946400  | -0.63064200                 |
| C                                            | 1.74830400  | 2.66657600  | -0.85361300                 |
| H                                            | 1.12757700  | 3.30115900  | -0.22080800                 |
| H                                            | 2.49952500  | 2.18435400  | -0.22613000                 |
| H                                            | 2.24581700  | 3.28592200  | -1.60479600                 |
| C                                            | -0.40005700 | 2.32768700  | -2.76368800                 |
| H                                            | -0.98823300 | 1.63435600  | -3.36746500                 |
| H                                            | -1.08918900 | 2.93422700  | -2.17538400                 |

|   |             |             |             |
|---|-------------|-------------|-------------|
| H | 0.17423400  | 2.98056000  | -3.42650300 |
| C | 1.89255700  | 0.62355700  | -2.84884500 |
| H | 2.70224500  | 0.13751600  | -2.30585500 |
| H | 1.38516400  | -0.13218400 | -3.44905000 |
| H | 2.29952800  | 1.39710500  | -3.50571000 |
| C | -0.17025600 | -2.42057000 | -1.87872700 |
| H | 0.39700500  | -3.28788300 | -2.24053200 |
| H | -1.09760500 | -2.78312600 | -1.42461700 |
| H | -0.46829300 | -1.82405700 | -2.74928400 |
| C | -4.00102200 | -2.85217600 | -0.02817200 |
| O | -3.20897200 | -3.53987600 | -0.63409900 |
| O | -1.31984600 | -1.34657200 | 1.16882900  |
| H | -5.09263600 | -3.00446400 | -0.11075500 |
| H | 2.26628700  | -2.89157000 | -0.98105300 |
| C | 2.80330000  | -1.33241200 | 0.41192700  |
| C | 4.18489800  | -1.51134500 | 0.21891500  |
| C | 2.39637900  | -0.54268600 | 1.50193500  |
| C | 5.11962200  | -0.89878000 | 1.04806800  |
| H | 4.52411100  | -2.13889600 | -0.59949300 |
| C | 3.33142900  | 0.06805900  | 2.33318000  |
| H | 1.33786100  | -0.44083700 | 1.71128100  |
| C | 4.69780600  | -0.09835500 | 2.10825400  |
| H | 6.17873300  | -1.05140600 | 0.87000800  |
| H | 2.99052900  | 0.66078600  | 3.17575500  |
| H | 5.42309300  | 0.37350000  | 2.76165300  |
| O | -3.72703900 | -1.86047000 | 0.79069100  |
| H | -2.68105600 | -1.70069100 | 0.90532400  |
| H | -0.80908700 | -2.16203300 | 1.13156900  |

### M2<sub>Me</sub>'w-d

|                                              |             |             |                             |
|----------------------------------------------|-------------|-------------|-----------------------------|
| Zero-point correction=                       |             |             | 0.427674 (Hartree/Particle) |
| Thermal correction to Energy=                |             |             | 0.459502                    |
| Thermal correction to Enthalpy=              |             |             | 0.460447                    |
| Thermal correction to Gibbs Free Energy=     |             |             | 0.361714                    |
| Sum of electronic and zero-point Energies=   |             |             | -1662.842672                |
| Sum of electronic and thermal Energies=      |             |             | -1662.810843                |
| Sum of electronic and thermal Enthalpies=    |             |             | -1662.809899                |
| Sum of electronic and thermal Free Energies= |             |             | -1662.908631                |
| Pd                                           | 0.68293800  | 0.01557600  | -0.40918700                 |
| C                                            | -2.20339500 | 0.58978200  | -1.17228200                 |
| C                                            | -0.91742200 | 0.61869100  | -1.55211900                 |
| P                                            | 2.71332400  | -0.19554500 | 0.97942500                  |
| P                                            | 0.16859900  | -2.18940500 | -0.86107700                 |
| C                                            | 4.11001600  | 0.66612000  | 0.14774500                  |



|   |             |             |             |
|---|-------------|-------------|-------------|
| H | 4.41403200  | 0.11080900  | -0.74186900 |
| H | 3.74028900  | 1.64541800  | -0.15586100 |
| H | 4.96951600  | 0.77917100  | 0.81398100  |
| C | 3.51766300  | -1.74398800 | 1.60549600  |
| H | 3.83312200  | -2.37226400 | 0.76988500  |
| H | 4.39611400  | -1.51325900 | 2.21443900  |
| H | 2.81294800  | -2.31220100 | 2.21651400  |
| C | 2.48802900  | 0.77471000  | 2.52630500  |
| H | 1.76260800  | 0.27749500  | 3.17328500  |
| H | 3.43145500  | 0.89013700  | 3.06672800  |
| H | 2.09871800  | 1.75267300  | 2.24427700  |
| C | -0.18757500 | -3.20727200 | 0.63216500  |
| H | 0.66165300  | -3.17124600 | 1.31545700  |
| H | -1.05832700 | -2.79282500 | 1.14248000  |
| H | -0.38590800 | -4.24756400 | 0.36042800  |
| C | 1.55502600  | -3.09922900 | -1.67211600 |
| H | 1.78310700  | -2.62850500 | -2.63003400 |
| H | 2.44800400  | -3.05321500 | -1.04849100 |
| H | 1.29146300  | -4.14656500 | -1.84263900 |
| C | -1.24271100 | -2.60669400 | -1.96234700 |
| H | -2.17011900 | -2.25110100 | -1.51536600 |
| H | -1.11818700 | -2.11222200 | -2.92609300 |
| H | -1.29559500 | -3.68883900 | -2.11020000 |
| C | -0.52134400 | 1.20153100  | -2.88393200 |
| H | -1.40191100 | 1.41384700  | -3.50334900 |
| H | 0.01014900  | 2.14842000  | -2.74653300 |
| H | 0.14287800  | 0.53657900  | -3.44638300 |
| C | -0.71415900 | 4.45033300  | -0.09561800 |
| O | -0.49164800 | 3.64703500  | 0.92033400  |
| O | 1.18595800  | 2.02208500  | -0.02939300 |
| H | -1.44624600 | 5.23326400  | 0.16582000  |
| H | -2.93865600 | 0.95722400  | -1.89405600 |
| C | -2.79944800 | 0.08401900  | 0.07515500  |
| C | -4.09980800 | -0.45160700 | 0.04685200  |
| C | -2.13979400 | 0.12398000  | 1.31567000  |
| C | -4.69873900 | -0.96469800 | 1.19348300  |
| H | -4.64224600 | -0.46546300 | -0.89363000 |
| C | -2.73957200 | -0.38635700 | 2.46384600  |
| H | -1.16825300 | 0.59866800  | 1.37632000  |
| C | -4.01772900 | -0.94206200 | 2.40961000  |
| H | -5.70090100 | -1.37644300 | 1.13929300  |
| H | -2.21545600 | -0.32730400 | 3.41210100  |
| H | -4.48520900 | -1.33162400 | 3.30705000  |
| O | -0.20291900 | 4.38429300  | -1.19607500 |

|   |            |            |             |
|---|------------|------------|-------------|
| H | 0.19020400 | 2.91700300 | 0.61505000  |
| H | 1.13139300 | 2.51683300 | -0.85764000 |

**M2<sub>Me</sub>'-b**

Zero-point correction= 0.403469 (Hartree/Particle)

|                                              |              |
|----------------------------------------------|--------------|
| Thermal correction to Energy=                | 0.432700     |
| Thermal correction to Enthalpy=              | 0.433644     |
| Thermal correction to Gibbs Free Energy=     | 0.343229     |
| Sum of electronic and zero-point Energies=   | -1586.424842 |
| Sum of electronic and thermal Energies=      | -1586.395612 |
| Sum of electronic and thermal Enthalpies=    | -1586.394667 |
| Sum of electronic and thermal Free Energies= | -1586.485082 |

|    |             |             |             |
|----|-------------|-------------|-------------|
| Pd | 0.73709000  | 0.21678200  | 0.14197700  |
| C  | -1.87375200 | -0.44801500 | 1.54592800  |
| C  | -0.56133500 | -0.17221600 | 1.65146300  |
| P  | 1.37295700  | -2.09008300 | 0.12056000  |
| P  | 0.10281100  | 2.49993500  | 0.11844700  |
| C  | 1.74176100  | -2.78866900 | -1.54024200 |
| H  | 0.88230700  | -2.65107900 | -2.19866800 |
| H  | 2.60233800  | -2.26070000 | -1.94678200 |
| H  | 1.96320700  | -3.85660500 | -1.45965700 |
| C  | 0.12851900  | -3.28441600 | 0.77083400  |
| H  | -0.79803200 | -3.19753800 | 0.20154500  |
| H  | 0.50792400  | -4.30684100 | 0.69248900  |
| H  | -0.09786300 | -3.06117600 | 1.81323400  |
| C  | 2.87419200  | -2.48135200 | 1.10584300  |
| H  | 2.71829300  | -2.19355300 | 2.14709600  |
| H  | 3.09725800  | -3.55099100 | 1.05939700  |
| H  | 3.69754400  | -1.90328300 | 0.68899400  |
| C  | 1.52612700  | 3.60115800  | 0.49531400  |
| H  | 1.84581100  | 3.45152300  | 1.52808000  |
| H  | 2.34654800  | 3.32488400  | -0.16694800 |
| H  | 1.26588500  | 4.65261300  | 0.34698100  |
| C  | -1.24399500 | 3.13660400  | 1.19593800  |
| H  | -0.99100600 | 2.96914000  | 2.24409900  |
| H  | -1.40093700 | 4.20578400  | 1.03063400  |
| H  | -2.16598200 | 2.59537000  | 0.98111700  |
| C  | -0.40141300 | 3.00933600  | -1.57204700 |
| H  | -0.52721900 | 4.09326900  | -1.64083500 |
| H  | 0.37722000  | 2.67516300  | -2.25811900 |
| H  | -1.33980500 | 2.51810100  | -1.83453200 |
| C  | 0.06896800  | -0.07523300 | 3.02086300  |
| H  | 0.53450000  | 0.90344600  | 3.18186800  |
| H  | -0.66698700 | -0.23652400 | 3.81851500  |

|   |             |             |             |
|---|-------------|-------------|-------------|
| H | 0.87167400  | -0.80942200 | 3.15193400  |
| C | 3.22498600  | 0.51510200  | -1.65910200 |
| O | 3.79418300  | -0.42384900 | -1.10866500 |
| O | 2.03810200  | 0.95779600  | -1.44821600 |
| H | 3.75721500  | 1.08164700  | -2.45356300 |
| H | -2.41136000 | -0.58540800 | 2.48846300  |
| C | -2.74729000 | -0.58988100 | 0.37170600  |
| C | -4.12819100 | -0.76020900 | 0.58753200  |
| C | -2.30434600 | -0.57294800 | -0.96428700 |
| C | -5.02186200 | -0.89649900 | -0.46914700 |
| H | -4.49957500 | -0.78352300 | 1.60734200  |
| C | -3.19770500 | -0.70898100 | -2.02230100 |
| H | -1.24543500 | -0.45278000 | -1.16954700 |
| C | -4.56231200 | -0.87015300 | -1.78444900 |
| H | -6.07950700 | -1.02453500 | -0.26510000 |
| H | -2.82381800 | -0.69298900 | -3.04075100 |
| H | -5.25523800 | -0.97709800 | -2.61134700 |

### Com<sub>3</sub>Me'-a

|                                              |             |             |                             |
|----------------------------------------------|-------------|-------------|-----------------------------|
| Zero-point correction=                       |             |             | 0.398640 (Hartree/Particle) |
| Thermal correction to Energy=                |             |             | 0.428427                    |
| Thermal correction to Enthalpy=              |             |             | 0.429371                    |
| Thermal correction to Gibbs Free Energy=     |             |             | 0.336369                    |
| Sum of electronic and zero-point Energies=   |             |             | -1586.402730                |
| Sum of electronic and thermal Energies=      |             |             | -1586.372943                |
| Sum of electronic and thermal Enthalpies=    |             |             | -1586.371999                |
| Sum of electronic and thermal Free Energies= |             |             | -1586.465000                |
| Pd                                           | 0.69957400  | 0.00036700  | 0.32452500                  |
| C                                            | -2.15772700 | -0.00325100 | 1.47754600                  |
| C                                            | -0.83538200 | -0.00218000 | 1.71501600                  |
| P                                            | 0.77086200  | -2.35946100 | 0.23015800                  |
| P                                            | 0.76464600  | 2.36043600  | 0.23172300                  |
| C                                            | 0.63034600  | -2.98593600 | -1.49143700                 |
| H                                            | -0.32883900 | -2.68431600 | -1.91513900                 |
| H                                            | 1.44055600  | -2.54981800 | -2.07718700                 |
| H                                            | 0.70838500  | -4.07637200 | -1.51447600                 |
| C                                            | -0.48439100 | -3.33582700 | 1.15264400                  |
| H                                            | -1.48244600 | -3.04587900 | 0.82258700                  |
| H                                            | -0.33821000 | -4.40618700 | 0.98525000                  |
| H                                            | -0.40775800 | -3.12520800 | 2.22023500                  |
| C                                            | 2.37951100  | -3.04405000 | 0.79812000                  |
| H                                            | 2.55167500  | -2.77429700 | 1.84146400                  |
| H                                            | 2.39673300  | -4.13289900 | 0.69923400                  |
| H                                            | 3.16588300  | -2.60860700 | 0.17996900                  |

|   |             |             |             |
|---|-------------|-------------|-------------|
| C | 2.37168100  | 3.04911000  | 0.79934000  |
| H | 2.54504600  | 2.77926200  | 1.84246100  |
| H | 3.15900000  | 2.61622000  | 0.18060700  |
| H | 2.38581200  | 4.13806000  | 0.70106400  |
| C | -0.49273100 | 3.33292000  | 1.15539700  |
| H | -0.41494600 | 3.12186100  | 2.22281700  |
| H | -0.34945600 | 4.40375800  | 0.98856800  |
| H | -1.49018800 | 3.04053800  | 0.82569900  |
| C | 0.62168200  | 2.98740700  | -1.48948700 |
| H | 0.69685600  | 4.07805700  | -1.51202800 |
| H | 1.43278400  | 2.55372200  | -2.07581600 |
| H | -0.33689700 | 2.68345600  | -1.91288500 |
| C | -0.32902900 | -0.00264600 | 3.13674200  |
| H | 0.29948600  | 0.87109600  | 3.34296200  |
| H | -1.15256500 | -0.00408900 | 3.86293100  |
| H | 0.30147300  | -0.87524600 | 3.34174600  |
| C | 3.17062700  | 0.00423100  | -1.59744400 |
| O | 3.46710200  | 1.15230900  | -1.81469200 |
| O | 3.47076900  | -1.14294100 | -1.81449000 |
| H | 2.04564200  | 0.00250500  | -0.78627100 |
| H | -2.80596600 | -0.00441900 | 2.35972000  |
| C | -2.91704300 | -0.00293200 | 0.21772300  |
| C | -4.32290000 | -0.00275900 | 0.28646500  |
| C | -2.33780100 | -0.00283100 | -1.06476300 |
| C | -5.11036100 | -0.00239500 | -0.85993200 |
| H | -4.79948000 | -0.00289600 | 1.26179200  |
| C | -3.12406400 | -0.00247100 | -2.21253500 |
| H | -1.25596600 | -0.00305100 | -1.15672000 |
| C | -4.51562100 | -0.00223600 | -2.11999200 |
| H | -6.19124200 | -0.00224500 | -0.76901900 |
| H | -2.64643400 | -0.00241900 | -3.18678100 |
| H | -5.12570200 | -0.00196800 | -3.01611200 |

### TS<sub>Me'</sub>-a

|                                              |             |             |                             |
|----------------------------------------------|-------------|-------------|-----------------------------|
| Zero-point correction=                       |             |             | 0.398280 (Hartree/Particle) |
| Thermal correction to Energy=                |             |             | 0.427422                    |
| Thermal correction to Enthalpy=              |             |             | 0.428367                    |
| Thermal correction to Gibbs Free Energy=     |             |             | 0.336703                    |
| Sum of electronic and zero-point Energies=   |             |             | -1586.402636                |
| Sum of electronic and thermal Energies=      |             |             | -1586.373494                |
| Sum of electronic and thermal Enthalpies=    |             |             | -1586.372549                |
| Sum of electronic and thermal Free Energies= |             |             | -1586.464213                |
| Pd                                           | -0.74679500 | 0.00494900  | 0.37331700                  |
| C                                            | 2.14758700  | -0.00356600 | 1.47740400                  |

|   |             |             |             |
|---|-------------|-------------|-------------|
| C | 0.82800900  | -0.00615600 | 1.73136800  |
| P | -0.75035500 | 2.36364200  | 0.23788200  |
| P | -0.71774600 | -2.35092100 | 0.22890400  |
| C | -0.54349700 | 2.95553500  | -1.49008300 |
| H | 0.42182700  | 2.62791600  | -1.87902100 |
| H | -1.34245600 | 2.52691400  | -2.09559600 |
| H | -0.59591100 | 4.04706300  | -1.53244400 |
| C | 0.51790600  | 3.31297500  | 1.17104700  |
| H | 1.51076200  | 2.97226800  | 0.87596900  |
| H | 0.42201000  | 4.38362300  | 0.97278100  |
| H | 0.40391400  | 3.13348500  | 2.24127500  |
| C | -2.34452300 | 3.12399500  | 0.75152100  |
| H | -2.55447100 | 2.87718300  | 1.79366600  |
| H | -2.31804100 | 4.21108900  | 0.63697500  |
| H | -3.13401600 | 2.71026200  | 0.12263700  |
| C | -2.29058700 | -3.12177100 | 0.78846300  |
| H | -2.46431900 | -2.88376100 | 1.83936100  |
| H | -3.10234800 | -2.70658800 | 0.18974400  |
| H | -2.26323600 | -4.20790000 | 0.66551800  |
| C | 0.58038700  | -3.29655900 | 1.12388100  |
| H | 0.51299600  | -3.10078900 | 2.19487100  |
| H | 0.46351600  | -4.36867600 | 0.94524500  |
| H | 1.56403700  | -2.97257900 | 0.78304000  |
| C | -0.55093400 | -2.93358600 | -1.50587400 |
| H | -0.56179200 | -4.02601700 | -1.55124200 |
| H | -1.38817900 | -2.53471900 | -2.07930800 |
| H | 0.38633300  | -2.56755700 | -1.92783300 |
| C | 0.34524400  | -0.02112900 | 3.16166000  |
| H | -0.28607800 | -0.89324800 | 3.36693600  |
| H | 1.17907900  | -0.03341900 | 3.87609100  |
| H | -0.27710500 | 0.85255000  | 3.38617000  |
| C | -3.20474900 | -0.04565900 | -1.63272500 |
| O | -3.48213400 | -1.19917500 | -1.81050600 |
| O | -3.45930800 | 1.09882400  | -1.88240300 |
| H | -2.08594100 | -0.02326200 | -0.69748800 |
| H | 2.81032400  | -0.01732500 | 2.34888400  |
| C | 2.88547000  | 0.00755600  | 0.20517900  |
| C | 4.29205900  | -0.02244400 | 0.24601600  |
| C | 2.28170000  | 0.04545900  | -1.06540500 |
| C | 5.05670900  | -0.01700800 | -0.91588400 |
| H | 4.78744400  | -0.05146400 | 1.21153600  |
| C | 3.04496300  | 0.05137100  | -2.22851000 |
| H | 1.19874200  | 0.07205300  | -1.13357300 |
| C | 4.43777000  | 0.01979200  | -2.16377700 |

|   |            |             |             |
|---|------------|-------------|-------------|
| H | 6.13895600 | -0.04131700 | -0.84657400 |
| H | 2.54824200 | 0.08130900  | -3.19274900 |
| H | 5.03023500 | 0.02438500  | -3.07164400 |

### M3<sub>Me</sub>'-a

|                                              |             |             |                             |
|----------------------------------------------|-------------|-------------|-----------------------------|
| Zero-point correction=                       |             |             | 0.397955 (Hartree/Particle) |
| Thermal correction to Energy=                |             |             | 0.428572                    |
| Thermal correction to Enthalpy=              |             |             | 0.429516                    |
| Thermal correction to Gibbs Free Energy=     |             |             | 0.330214                    |
| Sum of electronic and zero-point Energies=   |             |             | -1586.413859                |
| Sum of electronic and thermal Energies=      |             |             | -1586.383242                |
| Sum of electronic and thermal Enthalpies=    |             |             | -1586.382298                |
| Sum of electronic and thermal Free Energies= |             |             | -1586.481600                |
| Pd                                           | -0.62180400 | 0.00039000  | 0.57425700                  |
| C                                            | 2.45536600  | -0.00040500 | 1.27514400                  |
| C                                            | 1.17832100  | 0.00004800  | 1.70559500                  |
| P                                            | -0.74433700 | 2.32828200  | 0.45057800                  |
| P                                            | -0.74577400 | -2.32747600 | 0.45136300                  |
| C                                            | -0.59838500 | 2.96623800  | -1.27084900                 |
| H                                            | 0.36434900  | 2.66502400  | -1.68693800                 |
| H                                            | -1.39332200 | 2.53256100  | -1.87832000                 |
| H                                            | -0.67563500 | 4.05685300  | -1.29423500                 |
| C                                            | 0.49904000  | 3.34062400  | 1.35698600                  |
| H                                            | 1.49955700  | 3.03923700  | 1.04540000                  |
| H                                            | 0.35529200  | 4.40757000  | 1.16536300                  |
| H                                            | 0.41262200  | 3.15355300  | 2.42858600                  |
| C                                            | -2.34253500 | 3.05031100  | 1.01615600                  |
| H                                            | -2.51408300 | 2.78522400  | 2.06091600                  |
| H                                            | -2.34407600 | 4.13940400  | 0.91655900                  |
| H                                            | -3.14969400 | 2.62660800  | 0.41796900                  |
| C                                            | -2.34496900 | -3.04831500 | 1.01562700                  |
| H                                            | -2.51742900 | -2.78265600 | 2.06009200                  |
| H                                            | -3.15125400 | -2.62439900 | 0.41641400                  |
| H                                            | -2.34705100 | -4.13745100 | 0.91651400                  |
| C                                            | 0.49609100  | -3.34030000 | 1.35931100                  |
| H                                            | 0.40880600  | -3.15277800 | 2.43076200                  |
| H                                            | 0.35181000  | -4.40722300 | 1.16795700                  |
| H                                            | 1.49709500  | -3.03969800 | 1.04852600                  |
| C                                            | -0.59855600 | -2.96612500 | -1.26970500                 |
| H                                            | -0.67641500 | -4.05670400 | -1.29277000                 |
| H                                            | -1.39269900 | -2.53224200 | -1.87806800                 |
| H                                            | 0.36472900  | -2.66559900 | -1.68501200                 |
| C                                            | 0.94147200  | 0.00038100  | 3.19942300                  |
| H                                            | 0.35362200  | -0.87109300 | 3.51267200                  |

|   |             |             |             |
|---|-------------|-------------|-------------|
| H | 1.87626900  | 0.00009400  | 3.77835100  |
| H | 0.35435400  | 0.87245700  | 3.51238200  |
| C | -3.81158800 | -0.00033500 | -2.25159400 |
| O | -3.82925700 | -1.16098800 | -2.26912900 |
| O | -3.82826600 | 1.16029500  | -2.27123500 |
| H | -2.03885400 | 0.00072900  | -0.23442300 |
| H | 3.24489200  | -0.00051800 | 2.03603600  |
| C | 2.99492800  | -0.00075900 | -0.09356900 |
| C | 4.39184600  | -0.00124900 | -0.26987500 |
| C | 2.20597500  | -0.00063000 | -1.26027200 |
| C | 4.97153500  | -0.00159400 | -1.53447400 |
| H | 5.02863300  | -0.00135800 | 0.60951700  |
| C | 2.78393500  | -0.00097500 | -2.52579300 |
| H | 1.12439500  | -0.00026200 | -1.16197800 |
| C | 4.17112800  | -0.00145900 | -2.67510200 |
| H | 6.05241700  | -0.00196900 | -1.62952600 |
| H | 2.14611900  | -0.00086400 | -3.40419200 |
| H | 4.61879700  | -0.00172600 | -3.66263700 |

#### M4<sub>Me</sub>'-a

|                                              |             |             |                             |
|----------------------------------------------|-------------|-------------|-----------------------------|
| Zero-point correction=                       |             |             | 0.386237 (Hartree/Particle) |
| Thermal correction to Energy=                |             |             | 0.412143                    |
| Thermal correction to Enthalpy=              |             |             | 0.413087                    |
| Thermal correction to Gibbs Free Energy=     |             |             | 0.329187                    |
| Sum of electronic and zero-point Energies=   |             |             | -1397.779066                |
| Sum of electronic and thermal Energies=      |             |             | -1397.753160                |
| Sum of electronic and thermal Enthalpies=    |             |             | -1397.752216                |
| Sum of electronic and thermal Free Energies= |             |             | -1397.836116                |
| Pd                                           | -1.10083400 | 0.01314600  | -0.15268500                 |
| C                                            | 1.45289400  | -0.08988500 | 1.72062200                  |
| C                                            | 0.10908200  | -0.06966700 | 1.60930000                  |
| P                                            | -1.14555700 | 2.33951500  | -0.25294900                 |
| P                                            | -1.18295700 | -2.31459000 | -0.32210300                 |
| C                                            | -0.47002200 | 3.01752400  | -1.82693100                 |
| H                                            | 0.58207200  | 2.74148300  | -1.91316400                 |
| H                                            | -1.01128600 | 2.57775200  | -2.66510300                 |
| H                                            | -0.55938700 | 4.10699400  | -1.86032600                 |
| C                                            | -0.23127300 | 3.31378200  | 1.01545200                  |
| H                                            | 0.81321500  | 3.00025500  | 1.02175000                  |
| H                                            | -0.29554500 | 4.38667500  | 0.81351600                  |
| H                                            | -0.64658700 | 3.10851200  | 2.00321200                  |
| C                                            | -2.83420700 | 3.07414100  | -0.18195000                 |
| H                                            | -3.30724500 | 2.80622500  | 0.76447600                  |
| H                                            | -2.79869100 | 4.16368500  | -0.26971500                 |

|   |             |             |             |
|---|-------------|-------------|-------------|
| H | -3.43541100 | 2.65895300  | -0.99141700 |
| C | -2.40974300 | -3.01481500 | -1.50628800 |
| H | -3.41105200 | -2.69060600 | -1.21836800 |
| H | -2.20507600 | -2.61924900 | -2.50193000 |
| H | -2.37167400 | -4.10781200 | -1.52888700 |
| C | -1.55988000 | -3.24689100 | 1.22317700  |
| H | -2.53031400 | -2.93770300 | 1.61538600  |
| H | -1.57689600 | -4.32421900 | 1.03646100  |
| H | -0.79766900 | -3.02147300 | 1.96962300  |
| C | 0.39426400  | -3.08959500 | -0.86902200 |
| H | 0.30218600  | -4.17852100 | -0.90853900 |
| H | 0.66146500  | -2.71443900 | -1.85776100 |
| H | 1.18901500  | -2.81110500 | -0.17641100 |
| C | -0.69400100 | -0.05557200 | 2.89192000  |
| H | -1.42313500 | -0.87232900 | 2.92838400  |
| H | -0.06363800 | -0.12470500 | 3.79050000  |
| H | -1.28729900 | 0.86408600  | 2.97326000  |
| H | 1.87693400  | -0.12102500 | 2.73159600  |
| C | 2.49146900  | -0.05015200 | 0.67884200  |
| C | 3.84352500  | -0.10782000 | 1.06781200  |
| C | 2.22978600  | 0.05872300  | -0.70058500 |
| C | 4.87671500  | -0.06217400 | 0.13736500  |
| H | 4.07926600  | -0.18910100 | 2.12454700  |
| C | 3.26140000  | 0.10404500  | -1.63245100 |
| H | 1.19780500  | 0.10468200  | -1.03613300 |
| C | 4.59377700  | 0.04422700  | -1.22297200 |
| H | 5.90659400  | -0.10916100 | 0.47581200  |
| H | 3.02405300  | 0.18658700  | -2.68852500 |
| H | 5.39607100  | 0.08055500  | -1.95148900 |
| H | -2.06443200 | 0.10121100  | -1.45720200 |

#### M4<sub>Me</sub>'-b

|                                              |             |             |                             |
|----------------------------------------------|-------------|-------------|-----------------------------|
| Zero-point correction=                       |             |             | 0.385965 (Hartree/Particle) |
| Thermal correction to Energy=                |             |             | 0.412147                    |
| Thermal correction to Enthalpy=              |             |             | 0.413091                    |
| Thermal correction to Gibbs Free Energy=     |             |             | 0.328431                    |
| Sum of electronic and zero-point Energies=   |             |             | -1397.778168                |
| Sum of electronic and thermal Energies=      |             |             | -1397.751987                |
| Sum of electronic and thermal Enthalpies=    |             |             | -1397.751042                |
| Sum of electronic and thermal Free Energies= |             |             | -1397.835702                |
| Pd                                           | 0.72230700  | -0.00877500 | 0.63535400                  |
| C                                            | -2.18592500 | 0.40210300  | 1.60762100                  |
| C                                            | -0.87481300 | 0.63920100  | 1.79565500                  |
| P                                            | 2.67951300  | -1.15380300 | -0.11399400                 |



|   |             |             |             |
|---|-------------|-------------|-------------|
| P | 0.30243400  | 1.78526900  | -0.96472100 |
| C | 4.08250300  | -0.97431100 | 1.07309300  |
| H | 4.39123600  | 0.07185000  | 1.11771800  |
| H | 3.74194700  | -1.26658700 | 2.06722000  |
| H | 4.93945700  | -1.58968900 | 0.78469700  |
| C | 3.52904500  | -0.84606400 | -1.73233500 |
| H | 3.84969800  | 0.19552000  | -1.79108900 |
| H | 4.40263400  | -1.49248400 | -1.85733900 |
| H | 2.83200100  | -1.03576500 | -2.55131400 |
| C | 2.46070100  | -2.98603800 | -0.17724600 |
| H | 1.70943400  | -3.23733700 | -0.92850900 |
| H | 3.39618800  | -3.49800400 | -0.42036100 |
| H | 2.09466200  | -3.33030200 | 0.79059200  |
| C | 1.63510300  | 2.41444900  | -2.08960800 |
| H | 2.48880600  | 2.75105300  | -1.49770200 |
| H | 1.97009100  | 1.61528900  | -2.75252600 |
| H | 1.27744100  | 3.24911300  | -2.69898600 |
| C | -0.28949800 | 3.36654000  | -0.22033000 |
| H | 0.49018600  | 3.78887000  | 0.41645800  |
| H | -0.55219100 | 4.09387000  | -0.99342800 |
| H | -1.16271500 | 3.15814100  | 0.39817200  |
| C | -1.04171600 | 1.40850800  | -2.17120600 |
| H | -1.23197700 | 2.25998900  | -2.83083000 |
| H | -0.76135300 | 0.54218800  | -2.77296100 |
| H | -1.95203700 | 1.15472800  | -1.62765500 |
| C | -0.45186200 | 1.49614400  | 2.96552500  |
| H | 0.20262000  | 2.31889000  | 2.65733800  |
| H | -1.31240700 | 1.92592000  | 3.49691100  |
| H | 0.12746000  | 0.90151700  | 3.67952100  |
| H | -2.88257700 | 0.89874500  | 2.29128400  |
| C | -2.86457100 | -0.42953400 | 0.60126900  |
| C | -2.22939200 | -1.45295600 | -0.12516000 |
| C | -4.23464800 | -0.22071100 | 0.35662600  |
| C | -2.92557000 | -2.20736600 | -1.06376200 |
| H | -1.18268200 | -1.65771600 | 0.07195200  |
| C | -4.93126300 | -0.97300300 | -0.58412200 |
| H | -4.75451600 | 0.55051800  | 0.91717000  |
| C | -4.27928000 | -1.97155600 | -1.30527500 |
| H | -2.41119000 | -2.99637800 | -1.60352900 |
| H | -5.98632900 | -0.78236000 | -0.75105300 |
| H | -4.81935600 | -2.56443000 | -2.03519900 |
| H | 0.74728100  | -1.08590800 | 1.79340000  |

TS3<sub>Me</sub>'

|                                              |             |             |                             |
|----------------------------------------------|-------------|-------------|-----------------------------|
| Zero-point correction=                       |             |             | 0.384138 (Hartree/Particle) |
| Thermal correction to Energy=                |             |             | 0.410359                    |
| Thermal correction to Enthalpy=              |             |             | 0.411303                    |
| Thermal correction to Gibbs Free Energy=     |             |             | 0.325364                    |
| Sum of electronic and zero-point Energies=   |             |             | -1397.773635                |
| Sum of electronic and thermal Energies=      |             |             | -1397.747415                |
| Sum of electronic and thermal Enthalpies=    |             |             | -1397.746471                |
| Sum of electronic and thermal Free Energies= |             |             | -1397.832409                |
| Pd                                           | 0.66759400  | -0.00963600 | 0.56505300                  |
| C                                            | -2.26091500 | 0.39105500  | 1.56546500                  |
| C                                            | -0.94040900 | 0.49348700  | 1.82307300                  |
| P                                            | 2.42734900  | -1.50443000 | -0.07416200                 |
| P                                            | 0.77539400  | 1.99532500  | -0.81050500                 |
| C                                            | 3.52312200  | -1.97823800 | 1.33870800                  |
| H                                            | 4.03409500  | -1.09013000 | 1.71572900                  |
| H                                            | 2.90703100  | -2.37798600 | 2.14554500                  |
| H                                            | 4.26869800  | -2.72392800 | 1.04690300                  |
| C                                            | 3.69080100  | -1.11792600 | -1.37769500                 |
| H                                            | 4.22699600  | -0.20531600 | -1.10940500                 |
| H                                            | 4.41279100  | -1.93109100 | -1.49849500                 |
| H                                            | 3.18881900  | -0.94849300 | -2.33278200                 |
| C                                            | 1.83484400  | -3.15837000 | -0.65255600                 |
| H                                            | 1.25161000  | -3.03505500 | -1.56733600                 |
| H                                            | 2.66405300  | -3.84511900 | -0.84687400                 |
| H                                            | 1.17863200  | -3.58590400 | 0.10687800                  |
| C                                            | 2.36639400  | 2.67537200  | -1.47632800                 |
| H                                            | 3.03302000  | 2.91595300  | -0.64538500                 |
| H                                            | 2.85623500  | 1.91988000  | -2.09376100                 |
| H                                            | 2.20722700  | 3.57636600  | -2.07615600                 |
| C                                            | 0.04589300  | 3.50193700  | -0.02778200                 |
| H                                            | 0.66661200  | 3.81223800  | 0.81539700                  |
| H                                            | -0.03397800 | 4.33206800  | -0.73538300                 |
| H                                            | -0.94450200 | 3.25154600  | 0.35625500                  |
| C                                            | -0.23647100 | 1.85645400  | -2.35228300                 |
| H                                            | -0.26595400 | 2.80029900  | -2.90453300                 |
| H                                            | 0.18439500  | 1.08010100  | -2.99462600                 |
| H                                            | -1.25205700 | 1.55782100  | -2.08736900                 |
| C                                            | -0.49750300 | 1.21382000  | 3.07687400                  |
| H                                            | 0.18287800  | 2.04189100  | 2.85112700                  |
| H                                            | -1.35095700 | 1.61850800  | 3.63572700                  |
| H                                            | 0.05410700  | 0.53990700  | 3.74009600                  |
| H                                            | -2.93246600 | 0.88289000  | 2.27453300                  |
| C                                            | -2.97379900 | -0.29368200 | 0.48170900                  |
| C                                            | -2.34637200 | -1.00530900 | -0.55805900                 |

|   |             |             |             |
|---|-------------|-------------|-------------|
| C | -4.38136800 | -0.25304800 | 0.47324000  |
| C | -3.08991100 | -1.64053600 | -1.54685600 |
| H | -1.26210500 | -1.05865700 | -0.57646800 |
| C | -5.12505000 | -0.88414400 | -0.51756000 |
| H | -4.89368300 | 0.28419100  | 1.26551200  |
| C | -4.48362400 | -1.58421600 | -1.53781700 |
| H | -2.57731700 | -2.18436300 | -2.33412000 |
| H | -6.20845300 | -0.83113500 | -0.49236600 |
| H | -5.05944100 | -2.07772400 | -2.31288500 |
| H | -0.04055300 | -0.93886900 | 1.65900100  |

### M5<sub>Me</sub>'

|                                              |             |             |                             |
|----------------------------------------------|-------------|-------------|-----------------------------|
| Zero-point correction=                       |             |             | 0.389373 (Hartree/Particle) |
| Thermal correction to Energy=                |             |             | 0.416669                    |
| Thermal correction to Enthalpy=              |             |             | 0.417613                    |
| Thermal correction to Gibbs Free Energy=     |             |             | 0.326284                    |
| Sum of electronic and zero-point Energies=   |             |             | -1397.818127                |
| Sum of electronic and thermal Energies=      |             |             | -1397.790831                |
| Sum of electronic and thermal Enthalpies=    |             |             | -1397.789887                |
| Sum of electronic and thermal Free Energies= |             |             | -1397.881215                |
| Pd                                           | 1.49565900  | 0.06886200  | -0.14303100                 |
| C                                            | -2.93075000 | -0.17095100 | 1.83119700                  |
| C                                            | -1.69738100 | -0.13637100 | 2.35098400                  |
| P                                            | 1.68917800  | -2.24791100 | -0.21127500                 |
| P                                            | 1.36951900  | 2.39111100  | -0.16208600                 |
| C                                            | 1.18323300  | -3.20241000 | 1.29319400                  |
| H                                            | 1.78534200  | -2.87972400 | 2.14473900                  |
| H                                            | 0.13665300  | -2.99156300 | 1.52101000                  |
| H                                            | 1.30999500  | -4.28037400 | 1.15205700                  |
| C                                            | 3.38342400  | -2.93590300 | -0.50524100                 |
| H                                            | 4.05318800  | -2.60186500 | 0.28923900                  |
| H                                            | 3.37593600  | -4.02999200 | -0.53418900                 |
| H                                            | 3.76951500  | -2.55341100 | -1.45179300                 |
| C                                            | 0.72261200  | -3.12477000 | -1.52446100                 |
| H                                            | 1.02573300  | -2.75066600 | -2.50414900                 |
| H                                            | 0.87843600  | -4.20757000 | -1.48943600                 |
| H                                            | -0.34007600 | -2.90994700 | -1.39765000                 |
| C                                            | 2.97230500  | 3.31858200  | -0.20476200                 |
| H                                            | 3.56740700  | 3.05551600  | 0.67163900                  |
| H                                            | 3.53608400  | 3.02600200  | -1.09239300                 |
| H                                            | 2.81202300  | 4.40112900  | -0.22009800                 |
| C                                            | 0.52627700  | 3.21880100  | 1.26378200                  |
| H                                            | 1.05206200  | 2.96932100  | 2.18749100                  |
| H                                            | 0.50466400  | 4.30674000  | 1.14629000                  |

|   |             |             |             |
|---|-------------|-------------|-------------|
| H | -0.49610600 | 2.84559500  | 1.34722000  |
| C | 0.48101500  | 3.16255600  | -1.59125400 |
| H | 0.47947900  | 4.25523100  | -1.52698600 |
| H | 0.96320800  | 2.85850900  | -2.52216700 |
| H | -0.54924400 | 2.80289100  | -1.61332100 |
| C | -1.40197800 | -0.15203900 | 3.82084300  |
| H | -0.84418900 | 0.74285500  | 4.12043100  |
| H | -2.31594100 | -0.19943800 | 4.41830300  |
| H | -0.77372800 | -1.00953100 | 4.08844900  |
| H | -3.77302400 | -0.21330200 | 2.52126100  |
| C | -3.30665700 | -0.15568400 | 0.40879200  |
| C | -2.36748200 | -0.11482100 | -0.63805300 |
| C | -4.66803800 | -0.18149800 | 0.06746100  |
| C | -2.78259400 | -0.09929700 | -1.96440500 |
| H | -1.30188200 | -0.09349500 | -0.42147400 |
| C | -5.08275100 | -0.16609500 | -1.26167500 |
| H | -5.40959800 | -0.21337200 | 0.85960400  |
| C | -4.14117300 | -0.12462200 | -2.28597600 |
| H | -2.03803000 | -0.06755500 | -2.75274600 |
| H | -6.14168900 | -0.18639800 | -1.49545000 |
| H | -4.45901600 | -0.11246400 | -3.32257300 |
| H | -0.82832300 | -0.09160700 | 1.69397400  |

### M1<sub>ph</sub>-Ac-c

|                                              |             |             |                             |
|----------------------------------------------|-------------|-------------|-----------------------------|
| Zero-point correction=                       |             |             | 0.428306 (Hartree/Particle) |
| Thermal correction to Energy=                |             |             | 0.461160                    |
| Thermal correction to Enthalpy=              |             |             | 0.462105                    |
| Thermal correction to Gibbs Free Energy=     |             |             | 0.358337                    |
| Sum of electronic and zero-point Energies=   |             |             | -1625.702952                |
| Sum of electronic and thermal Energies=      |             |             | -1625.670098                |
| Sum of electronic and thermal Enthalpies=    |             |             | -1625.669153                |
| Sum of electronic and thermal Free Energies= |             |             | -1625.772921                |
| Pd                                           | -0.30192400 | -0.66936200 | 0.17609900                  |
| C                                            | 1.56179000  | -1.11489500 | -0.79444800                 |
| C                                            | 2.91403200  | -0.62929100 | -0.65229300                 |
| C                                            | 3.79970700  | -1.21418400 | 0.27097900                  |
| C                                            | 3.38223400  | 0.44242500  | -1.43408600                 |
| C                                            | 5.10471700  | -0.74922900 | 0.39851300                  |
| H                                            | 3.45185900  | -2.03977900 | 0.88109800                  |
| C                                            | 4.68811900  | 0.90328600  | -1.30053500                 |
| H                                            | 2.70959400  | 0.90475300  | -2.14717500                 |
| C                                            | 5.55696500  | 0.31238900  | -0.38402200                 |
| H                                            | 5.77243800  | -1.21960300 | 1.11246800                  |
| H                                            | 5.02937500  | 1.72796700  | -1.91718800                 |

|   |             |             |             |
|---|-------------|-------------|-------------|
| H | 6.57367300  | 0.67419500  | -0.28137800 |
| C | 0.66335100  | -1.83476800 | -1.31375300 |
| P | -2.61400800 | -1.26103300 | 0.26256300  |
| P | 0.17589900  | 1.00947800  | 1.84613900  |
| C | -2.98318200 | -2.79040700 | 1.24043400  |
| H | -2.41627000 | -3.62742800 | 0.82878400  |
| H | -2.66405600 | -2.64558100 | 2.27433500  |
| H | -4.04922900 | -3.03650000 | 1.22599200  |
| C | -3.42513600 | -1.67355800 | -1.35149400 |
| H | -2.89337800 | -2.50360500 | -1.81985800 |
| H | -4.47690400 | -1.94697200 | -1.22339200 |
| H | -3.35606700 | -0.81284500 | -2.01942100 |
| C | -3.85103600 | -0.07863700 | 0.97029200  |
| H | -3.76756100 | 0.88121700  | 0.45760300  |
| H | -4.87392200 | -0.45627800 | 0.87874300  |
| H | -3.62796300 | 0.08959200  | 2.02527200  |
| C | -1.15331800 | 1.82103600  | 2.84630300  |
| H | -1.83653000 | 2.33004000  | 2.16491700  |
| H | -1.71014900 | 1.06598300  | 3.40541200  |
| H | -0.73884500 | 2.54762400  | 3.55180700  |
| C | 1.09457800  | 2.49430200  | 1.24027700  |
| H | 0.43892700  | 3.05862800  | 0.57532300  |
| H | 1.40697400  | 3.13916100  | 2.06732400  |
| H | 1.97457200  | 2.17368100  | 0.68020300  |
| C | 1.31007900  | 0.39651400  | 3.17573600  |
| H | 1.55456200  | 1.18201900  | 3.89728900  |
| H | 0.84033000  | -0.43754900 | 3.70124900  |
| H | 2.23090300  | 0.03243600  | 2.71626500  |
| C | 0.28731300  | -2.86445100 | -2.30772700 |
| H | -0.44444800 | -2.47202500 | -3.01976000 |
| H | 1.16080500  | -3.20806800 | -2.87333200 |
| H | -0.16715400 | -3.73418900 | -1.82422500 |
| C | -1.85723000 | 2.57182600  | -1.67723000 |
| O | -2.00166600 | 2.83894000  | -0.50505300 |
| O | -1.29708000 | 1.43900700  | -2.12532000 |
| H | -1.00292900 | 0.87580100  | -1.36302800 |
| C | -2.28170000 | 3.46768400  | -2.81612100 |
| H | -2.75940600 | 4.36126500  | -2.42061700 |
| H | -1.40819500 | 3.74293400  | -3.41172300 |
| H | -2.96862600 | 2.93329200  | -3.47603100 |

**TS1<sub>ph</sub>-Ac-c**

Zero-point correction=

0.423783 (Hartree/Particle)

Thermal correction to Energy=

0.455502

|                                              |             |             |              |
|----------------------------------------------|-------------|-------------|--------------|
| Thermal correction to Enthalpy=              |             |             | 0.456446     |
| Thermal correction to Gibbs Free Energy=     |             |             | 0.357399     |
| Sum of electronic and zero-point Energies=   |             |             | -1625.669830 |
| Sum of electronic and thermal Energies=      |             |             | -1625.638111 |
| Sum of electronic and thermal Enthalpies=    |             |             | -1625.637167 |
| Sum of electronic and thermal Free Energies= |             |             | -1625.736214 |
| Pd                                           | -0.31341700 | -0.24950800 | -0.45652600  |
| C                                            | 1.41735700  | 0.82031100  | -0.51709900  |
| C                                            | 2.84122500  | 0.57703400  | -0.40528700  |
| C                                            | 3.45257600  | -0.50456100 | -1.06507000  |
| C                                            | 3.65242300  | 1.43987200  | 0.35569500   |
| C                                            | 4.82568100  | -0.70464000 | -0.98115800  |
| H                                            | 2.83413900  | -1.16940600 | -1.65664500  |
| C                                            | 5.02369800  | 1.22558800  | 0.45134700   |
| H                                            | 3.19051300  | 2.27280600  | 0.87256700   |
| C                                            | 5.61590400  | 0.15563800  | -0.21781300  |
| H                                            | 5.28253400  | -1.53366600 | -1.51052300  |
| H                                            | 5.63255300  | 1.89797200  | 1.04566600   |
| H                                            | 6.68542100  | -0.00688400 | -0.14650000  |
| C                                            | 0.60008500  | 1.79754300  | -0.82423400  |
| P                                            | -2.64862300 | -0.53640600 | -1.11449900  |
| P                                            | 0.17652400  | -2.01361700 | 0.98921400   |
| C                                            | -3.10327500 | -1.81700100 | -2.37033000  |
| H                                            | -2.50834200 | -1.66574600 | -3.27322100  |
| H                                            | -2.87806900 | -2.81194600 | -1.98075900  |
| H                                            | -4.16456900 | -1.77029100 | -2.63095500  |
| C                                            | -3.27526400 | 1.01198100  | -1.90156300  |
| H                                            | -2.72445300 | 1.19074400  | -2.82743500  |
| H                                            | -4.34427500 | 0.94959000  | -2.12539100  |
| H                                            | -3.08026900 | 1.84738500  | -1.22672400  |
| C                                            | -3.89368400 | -0.82402800 | 0.21657100   |
| H                                            | -3.65229300 | -0.16439100 | 1.05163900   |
| H                                            | -4.91090000 | -0.63402200 | -0.13708500  |
| H                                            | -3.83008700 | -1.85724700 | 0.56300600   |
| C                                            | -1.16609700 | -3.21492700 | 1.39591200   |
| H                                            | -2.01932300 | -2.66908800 | 1.79960400   |
| H                                            | -1.48163900 | -3.74462800 | 0.49494700   |
| H                                            | -0.82841000 | -3.94447400 | 2.13764900   |
| C                                            | 0.57952500  | -1.31470200 | 2.64310300   |
| H                                            | -0.21090200 | -0.61155700 | 2.91228300   |
| H                                            | 0.67649400  | -2.09779400 | 3.40082200   |
| H                                            | 1.51686300  | -0.75998000 | 2.57297100   |
| C                                            | 1.58987400  | -3.15168500 | 0.65189100   |
| H                                            | 1.73884700  | -3.84992700 | 1.48067200   |

|   |             |             |             |
|---|-------------|-------------|-------------|
| H | 1.39504800  | -3.71799200 | -0.26123400 |
| H | 2.50077200  | -2.56996100 | 0.50672200  |
| C | 0.83625600  | 3.04801200  | -1.63657700 |
| H | 0.52061000  | 3.92704900  | -1.06905700 |
| H | 1.88731200  | 3.15464900  | -1.91879400 |
| H | 0.23209800  | 3.02636200  | -2.54852700 |
| C | -1.83918600 | 2.24014200  | 1.60881600  |
| O | -1.72759500 | 1.05084000  | 1.93833900  |
| O | -1.45903000 | 2.74825700  | 0.48605100  |
| H | -0.52698000 | 1.99998400  | -0.18900100 |
| C | -2.49027100 | 3.24099200  | 2.56220100  |
| H | -2.78898900 | 2.75116600  | 3.48862100  |
| H | -1.78954100 | 4.05137100  | 2.77784600  |
| H | -3.36345100 | 3.69145500  | 2.08276100  |

### TS1<sub>phW-Ac-c</sub>

|                                              |                             |
|----------------------------------------------|-----------------------------|
| Zero-point correction=                       | 0.449570 (Hartree/Particle) |
| Thermal correction to Energy=                | 0.483940                    |
| Thermal correction to Enthalpy=              | 0.484885                    |
| Thermal correction to Gibbs Free Energy=     | 0.380547                    |
| Sum of electronic and zero-point Energies=   | -1702.108436                |
| Sum of electronic and thermal Energies=      | -1702.074066                |
| Sum of electronic and thermal Enthalpies=    | -1702.073122                |
| Sum of electronic and thermal Free Energies= | -1702.177459                |

|    |             |             |             |
|----|-------------|-------------|-------------|
| Pd | -1.05721100 | -0.05267600 | 1.51974500  |
| C  | 0.81215800  | 0.41666500  | 0.18409700  |
| C  | -0.01215300 | 1.37418800  | 0.52537200  |
| P  | -1.97112600 | -2.34201200 | 1.84186500  |
| P  | -2.24338700 | 1.22907300  | 3.06485300  |
| C  | -3.10650700 | -2.71321000 | 3.25991100  |
| H  | -2.56951200 | -2.60765700 | 4.20445200  |
| H  | -3.95638300 | -2.02755400 | 3.26120400  |
| H  | -3.48654100 | -3.73607800 | 3.18958600  |
| C  | -0.75744500 | -3.71629900 | 2.00509000  |
| H  | -0.15959700 | -3.56471500 | 2.90561400  |
| H  | -1.27001200 | -4.68053500 | 2.06635400  |
| H  | -0.08688600 | -3.71239300 | 1.14569300  |
| C  | -2.99635500 | -2.87215000 | 0.40431800  |
| H  | -2.35130800 | -2.88882700 | -0.47726600 |
| H  | -3.42170800 | -3.86598000 | 0.57118700  |
| H  | -3.80653000 | -2.15781100 | 0.24235600  |
| C  | -1.69152800 | 2.96285100  | 3.35479400  |
| H  | -0.64701200 | 2.95769400  | 3.67064700  |
| H  | -1.76295100 | 3.54138600  | 2.43445700  |

|   |             |             |             |
|---|-------------|-------------|-------------|
| H | -2.30067800 | 3.43631000  | 4.12972400  |
| C | -2.21051600 | 0.56508900  | 4.78678800  |
| H | -1.17344600 | 0.44351100  | 5.10407500  |
| H | -2.71935300 | 1.24504700  | 5.47579600  |
| H | -2.69636300 | -0.40886700 | 4.82478700  |
| C | -4.04898100 | 1.44480200  | 2.74768800  |
| H | -4.52746500 | 2.01863900  | 3.54636200  |
| H | -4.18812500 | 1.96823500  | 1.80032800  |
| H | -4.53089400 | 0.46914500  | 2.66957100  |
| H | 1.16350000  | -0.57459600 | 0.94655100  |
| C | 2.35281500  | -2.48871700 | 1.05522900  |
| O | 1.99488300  | -1.40873700 | 1.65320100  |
| O | 1.88180800  | -2.92547700 | -0.00798500 |
| O | -0.38844400 | -2.29742500 | -1.46866800 |
| H | 0.43582900  | -2.53641600 | -0.99138900 |
| H | -0.53165400 | -1.37925200 | -1.21784600 |
| C | 3.43348700  | -3.29204000 | 1.77234200  |
| H | 4.19730000  | -2.62875400 | 2.18125500  |
| H | 2.97956900  | -3.82794000 | 2.61178500  |
| H | 3.87767400  | -4.01842500 | 1.09246800  |
| C | -0.21934400 | 2.77842300  | 0.21987600  |
| C | 0.82637100  | 3.70373700  | 0.38689600  |
| C | -1.45235800 | 3.24450000  | -0.27062400 |
| C | 0.64126700  | 5.04780800  | 0.07765900  |
| H | 1.77997300  | 3.35526300  | 0.76565000  |
| C | -1.62919100 | 4.58544700  | -0.59199300 |
| H | -2.26006500 | 2.53509300  | -0.41204200 |
| C | -0.58488900 | 5.49375100  | -0.41288200 |
| H | 1.45771900  | 5.74808400  | 0.21492900  |
| H | -2.58112500 | 4.92451300  | -0.98556100 |
| H | -0.72548400 | 6.54023900  | -0.65835400 |
| C | 1.76571400  | 0.37467500  | -0.99168000 |
| H | 1.61960200  | -0.53677600 | -1.57330000 |
| H | 1.63986000  | 1.24552000  | -1.63971000 |
| H | 2.79446600  | 0.34776700  | -0.62070500 |

### M2<sub>ph</sub>-Ac-c

|                                            |                             |
|--------------------------------------------|-----------------------------|
| Zero-point correction=                     | 0.430344 (Hartree/Particle) |
| Thermal correction to Energy=              | 0.461862                    |
| Thermal correction to Enthalpy=            | 0.462806                    |
| Thermal correction to Gibbs Free Energy=   | 0.364742                    |
| Sum of electronic and zero-point Energies= | -1625.709909                |
| Sum of electronic and thermal Energies=    | -1625.678392                |
| Sum of electronic and thermal Enthalpies=  | -1625.677448                |



|                                              |             |             |              |
|----------------------------------------------|-------------|-------------|--------------|
| Sum of electronic and thermal Free Energies= |             |             | -1625.775512 |
| Pd                                           | -0.43524100 | -0.04806100 | 0.12956500   |
| C                                            | 1.47140500  | 0.33399000  | 0.84414400   |
| C                                            | 2.49086700  | 0.42479300  | -0.22230000  |
| C                                            | 2.32602200  | 1.31022300  | -1.30432100  |
| C                                            | 3.63705200  | -0.38999300 | -0.20716300  |
| C                                            | 3.27524200  | 1.37655800  | -2.31866300  |
| H                                            | 1.45014500  | 1.94752800  | -1.31636300  |
| C                                            | 4.58338300  | -0.32386900 | -1.22873500  |
| H                                            | 3.79084300  | -1.07370800 | 0.62119800   |
| C                                            | 4.40601300  | 0.55894600  | -2.29096200  |
| H                                            | 3.13372900  | 2.07467200  | -3.13713800  |
| H                                            | 5.46180900  | -0.95969600 | -1.19025900  |
| H                                            | 5.14180300  | 0.61353300  | -3.08564900  |
| C                                            | 1.66127800  | 0.61246600  | 2.13568200   |
| P                                            | -2.71782800 | -0.14761100 | -0.81365000  |
| P                                            | -0.00298600 | -2.28582200 | 0.49144600   |
| C                                            | -3.09622600 | -1.34928000 | -2.17509100  |
| H                                            | -2.42617500 | -1.15641200 | -3.01583500  |
| H                                            | -2.94268500 | -2.37874000 | -1.84910500  |
| H                                            | -4.12919900 | -1.24495900 | -2.51850600  |
| C                                            | -3.25737600 | 1.42749300  | -1.60196100  |
| H                                            | -2.49089000 | 1.77837200  | -2.29309500  |
| H                                            | -4.20142800 | 1.28662400  | -2.13526200  |
| H                                            | -3.38639000 | 2.17083200  | -0.81706400  |
| C                                            | -4.06349800 | -0.45181900 | 0.40714300   |
| H                                            | -3.95085200 | 0.29582500  | 1.19342400   |
| H                                            | -5.05183900 | -0.36508300 | -0.05278800  |
| H                                            | -3.96128700 | -1.44573400 | 0.84628800   |
| C                                            | -1.45016400 | -3.41756500 | 0.68557100   |
| H                                            | -2.05264000 | -3.09521300 | 1.53662700   |
| H                                            | -2.07445900 | -3.40088200 | -0.20690400  |
| H                                            | -1.11354600 | -4.44313600 | 0.85876900   |
| C                                            | 0.97041100  | -2.74852200 | 1.98395500   |
| H                                            | 0.45733900  | -2.38805000 | 2.87708800   |
| H                                            | 1.07962700  | -3.83484300 | 2.04292800   |
| H                                            | 1.94961500  | -2.27607000 | 1.94897100   |
| C                                            | 0.93915700  | -3.06694800 | -0.88312900  |
| H                                            | 1.15500500  | -4.11750000 | -0.67019400  |
| H                                            | 0.35924400  | -2.99725400 | -1.80501300  |
| H                                            | 1.87385800  | -2.52357800 | -1.02919700  |
| C                                            | 2.91577000  | 1.16465000  | 2.76921300   |
| H                                            | 3.30990000  | 0.48440400  | 3.53454800   |
| H                                            | 3.70307800  | 1.34658300  | 2.03688500   |

|   |             |            |             |
|---|-------------|------------|-------------|
| H | 2.69804300  | 2.11110200 | 3.27709600  |
| C | -1.29179400 | 2.69497600 | 0.69201300  |
| O | -2.15384800 | 2.16001600 | 1.39699500  |
| O | -0.50230000 | 2.07860300 | -0.12247500 |
| H | 0.82391500  | 0.48770400 | 2.82025200  |
| C | -1.09174100 | 4.20777800 | 0.72006200  |
| H | -1.86900400 | 4.68325700 | 1.31724500  |
| H | -0.11225100 | 4.43113900 | 1.15108300  |
| H | -1.09763400 | 4.60935300 | -0.29587100 |

### M2<sub>ph</sub>w-Ac-c

|                                              |             |             |                             |
|----------------------------------------------|-------------|-------------|-----------------------------|
| Zero-point correction=                       |             |             | 0.454951 (Hartree/Particle) |
| Thermal correction to Energy=                |             |             | 0.488431                    |
| Thermal correction to Enthalpy=              |             |             | 0.489375                    |
| Thermal correction to Gibbs Free Energy=     |             |             | 0.387276                    |
| Sum of electronic and zero-point Energies=   |             |             | -1702.151271                |
| Sum of electronic and thermal Energies=      |             |             | -1702.117791                |
| Sum of electronic and thermal Enthalpies=    |             |             | -1702.116846                |
| Sum of electronic and thermal Free Energies= |             |             | -1702.218945                |
| Pd                                           | 0.22551800  | 0.26752500  | 0.09939000                  |
| C                                            | -1.18178000 | -2.31947700 | -0.30787800                 |
| C                                            | -1.38756000 | -1.03604800 | 0.01755800                  |
| P                                            | 2.02278100  | 1.79135300  | 0.80159800                  |
| P                                            | -0.25534900 | 0.84796600  | -2.07251600                 |
| C                                            | 2.46339900  | 3.41569300  | 0.02900000                  |
| H                                            | 2.88243300  | 3.26140200  | -0.96637400                 |
| H                                            | 1.57058400  | 4.03767900  | -0.06322300                 |
| H                                            | 3.19862900  | 3.94782100  | 0.63901400                  |
| C                                            | 3.67330300  | 0.98968500  | 0.95981900                  |
| H                                            | 4.04862800  | 0.73174800  | -0.03209300                 |
| H                                            | 4.38843600  | 1.64836700  | 1.46048900                  |
| H                                            | 3.56331100  | 0.06710000  | 1.52981700                  |
| C                                            | 1.63572100  | 2.28336000  | 2.53251600                  |
| H                                            | 1.39515900  | 1.36824200  | 3.07449800                  |
| H                                            | 2.47557600  | 2.80263400  | 3.00225200                  |
| H                                            | 0.75874000  | 2.93413500  | 2.53981300                  |
| C                                            | -0.13077800 | -0.60409800 | -3.19212900                 |
| H                                            | 0.82159100  | -1.10376400 | -3.00517200                 |
| H                                            | -0.92946800 | -1.30631100 | -2.95634100                 |
| H                                            | -0.19984700 | -0.29965400 | -4.23994900                 |
| C                                            | 0.88346900  | 2.04510200  | -2.89509600                 |
| H                                            | 1.90641400  | 1.66969000  | -2.83808700                 |
| H                                            | 0.61116000  | 2.17234500  | -3.94640500                 |
| H                                            | 0.83595000  | 3.01371900  | -2.39706500                 |

|   |             |             |             |
|---|-------------|-------------|-------------|
| C | -1.90108800 | 1.57795700  | -2.44935100 |
| H | -2.03256700 | 1.71170800  | -3.52657500 |
| H | -2.68872600 | 0.93282300  | -2.06108900 |
| H | -1.98746400 | 2.54696800  | -1.95389200 |
| H | -0.19787200 | -2.59090300 | -0.68486000 |
| C | 2.83247800  | -2.50016400 | 0.08670800  |
| O | 2.29133000  | -1.92911100 | -0.84910600 |
| O | 2.57836600  | -2.28339300 | 1.35968400  |
| O | 0.76394500  | -0.65229900 | 1.93740500  |
| H | 1.79724000  | -1.58522400 | 1.53890300  |
| H | 0.02426300  | -1.22093900 | 2.17483800  |
| C | 3.90160500  | -3.55731900 | -0.11673400 |
| H | 4.09616600  | -3.69639500 | -1.17866500 |
| H | 4.81918900  | -3.26012700 | 0.39680600  |
| H | 3.57479200  | -4.49979200 | 0.32922200  |
| C | -2.66422300 | -0.47697900 | 0.51627700  |
| C | -3.86893600 | -0.65122900 | -0.18931800 |
| C | -2.71145700 | 0.27564700  | 1.70449100  |
| C | -5.06545000 | -0.10815600 | 0.27480700  |
| H | -3.86183900 | -1.22022000 | -1.11260800 |
| C | -3.90733000 | 0.80932500  | 2.17239600  |
| H | -1.79400300 | 0.42838800  | 2.26144200  |
| C | -5.09186900 | 0.62417000  | 1.45903800  |
| H | -5.97876100 | -0.25955200 | -0.29102200 |
| H | -3.91519700 | 1.37446700  | 3.09841300  |
| H | -6.02229900 | 1.04621500  | 1.82196800  |
| C | -2.14180300 | -3.47571100 | -0.15803300 |
| H | -1.66698400 | -4.28547400 | 0.40740500  |
| H | -3.06208500 | -3.19591900 | 0.35571500  |
| H | -2.41177100 | -3.89925200 | -1.13362900 |

### M2<sub>Ph</sub>-Ac-d

|                                              |             |             |                             |
|----------------------------------------------|-------------|-------------|-----------------------------|
| Zero-point correction=                       |             |             | 0.430555 (Hartree/Particle) |
| Thermal correction to Energy=                |             |             | 0.461935                    |
| Thermal correction to Enthalpy=              |             |             | 0.462879                    |
| Thermal correction to Gibbs Free Energy=     |             |             | 0.366621                    |
| Sum of electronic and zero-point Energies=   |             |             | -1625.721727                |
| Sum of electronic and thermal Energies=      |             |             | -1625.690347                |
| Sum of electronic and thermal Enthalpies=    |             |             | -1625.689403                |
| Sum of electronic and thermal Free Energies= |             |             | -1625.785661                |
| Pd                                           | 0.47800100  | 0.00773700  | -0.02592700                 |
| C                                            | -1.43107500 | -0.60876100 | 2.14406000                  |
| C                                            | -1.35590700 | -0.31070400 | 0.83576400                  |
| P                                            | 0.28148700  | 2.35142500  | 0.19683000                  |

|   |             |             |             |
|---|-------------|-------------|-------------|
| P | 0.94721300  | -2.31700000 | -0.04303200 |
| C | 1.41249900  | 2.95098600  | 1.51702100  |
| H | 1.01433400  | 2.64061700  | 2.48519200  |
| H | 2.38661600  | 2.47583100  | 1.39418900  |
| H | 1.50570600  | 4.04058400  | 1.49810300  |
| C | -1.31279200 | 3.17241200  | 0.60402900  |
| H | -1.68356400 | 2.78538500  | 1.55402000  |
| H | -1.18183600 | 4.25511100  | 0.68069000  |
| H | -2.05314000 | 2.94932500  | -0.16507500 |
| C | 0.83786700  | 3.22606200  | -1.32154600 |
| H | 0.09744500  | 3.07893400  | -2.11023800 |
| H | 0.96971500  | 4.29663700  | -1.14401900 |
| H | 1.77507200  | 2.77616400  | -1.64879600 |
| C | -0.37319300 | -3.58591200 | 0.14834300  |
| H | -0.92784000 | -3.39237300 | 1.06667300  |
| H | -1.07258600 | -3.52473700 | -0.68699900 |
| H | 0.05594700  | -4.59081300 | 0.18512600  |
| C | 2.10715700  | -2.69845400 | 1.33113600  |
| H | 1.58259500  | -2.56747300 | 2.27966500  |
| H | 2.48220000  | -3.72365400 | 1.26593200  |
| H | 2.92920400  | -1.98144500 | 1.30272000  |
| C | 1.83932700  | -2.86267500 | -1.55615600 |
| H | 2.26233600  | -3.86316500 | -1.43337600 |
| H | 1.14793300  | -2.86696900 | -2.40132400 |
| H | 2.62778900  | -2.14159100 | -1.76953500 |
| H | -0.50082100 | -0.61196700 | 2.71064700  |
| C | 3.44942800  | 0.45064600  | -0.34957800 |
| O | 2.37012300  | 0.34403700  | -1.05107100 |
| O | 3.52146500  | 0.36361400  | 0.88028400  |
| C | -2.64283300 | -1.00568600 | 2.95643500  |
| H | -3.49924600 | -1.26635300 | 2.33359500  |
| H | -2.40506900 | -1.86983000 | 3.58673900  |
| H | -2.95617000 | -0.20578300 | 3.63951500  |
| C | -2.52178100 | -0.19907300 | -0.07399500 |
| C | -2.46465500 | -0.68735800 | -1.39244500 |
| C | -3.71164900 | 0.44386800  | 0.31805000  |
| C | -3.54814300 | -0.57898300 | -2.25782000 |
| H | -1.54446100 | -1.14087000 | -1.74112400 |
| C | -4.79473500 | 0.56180300  | -0.54968500 |
| H | -3.78015500 | 0.87297700  | 1.30990300  |
| C | -4.72352500 | 0.04405000  | -1.84081500 |
| H | -3.47072800 | -0.97258300 | -3.26574000 |
| H | -5.69553100 | 1.06591000  | -0.21578400 |
| H | -5.56609400 | 0.13616900  | -2.51683700 |

|   |            |            |             |
|---|------------|------------|-------------|
| C | 4.71264700 | 0.74022500 | -1.16216200 |
| H | 4.89952100 | 1.81870400 | -1.14616900 |
| H | 5.57059400 | 0.25169900 | -0.69834900 |
| H | 4.60719200 | 0.42738500 | -2.20120400 |

#### M4<sub>ph</sub>-Ac-a

Zero-point correction= 0.414668 (Hartree/Particle)

|                                              |              |
|----------------------------------------------|--------------|
| Thermal correction to Energy=                | 0.442894     |
| Thermal correction to Enthalpy=              | 0.443838     |
| Thermal correction to Gibbs Free Energy=     | 0.355472     |
| Sum of electronic and zero-point Energies=   | -1437.062035 |
| Sum of electronic and thermal Energies=      | -1437.033808 |
| Sum of electronic and thermal Enthalpies=    | -1437.032864 |
| Sum of electronic and thermal Free Energies= | -1437.121230 |

|    |             |             |             |
|----|-------------|-------------|-------------|
| Pd | 0.88140900  | 0.43887200  | -0.10270300 |
| C  | -0.60917100 | -1.00274100 | 2.14946800  |
| C  | -0.71953700 | -0.61910000 | 0.86343000  |
| P  | -0.20808800 | 2.49220500  | 0.13556000  |
| P  | 2.14695300  | -1.54890200 | -0.18037200 |
| C  | -1.80952500 | 2.58195300  | 1.03904900  |
| H  | -2.55358100 | 1.97145300  | 0.52676600  |
| H  | -1.67677300 | 2.17524300  | 2.04251800  |
| H  | -2.16617800 | 3.61363400  | 1.10491000  |
| C  | -0.61501200 | 3.31785600  | -1.46142500 |
| H  | -1.32525800 | 2.69524500  | -2.00849200 |
| H  | -1.05322100 | 4.30678600  | -1.30076500 |
| H  | 0.28889500  | 3.41406800  | -2.06360000 |
| C  | 0.78988500  | 3.76206600  | 1.02748600  |
| H  | 1.75541000  | 3.88618500  | 0.53738900  |
| H  | 0.27042200  | 4.72392900  | 1.05817700  |
| H  | 0.96752200  | 3.42060600  | 2.04903300  |
| C  | 3.45242900  | -1.71258300 | -1.47379200 |
| H  | 2.98427200  | -1.73662300 | -2.45979100 |
| H  | 4.11940200  | -0.85116600 | -1.43936100 |
| H  | 4.03274300  | -2.62826600 | -1.33241100 |
| C  | 1.28790900  | -3.17457100 | -0.31771400 |
| H  | 0.80515400  | -3.25562000 | -1.29301000 |
| H  | 1.99358900  | -4.00151600 | -0.19966800 |
| H  | 0.51533000  | -3.23404300 | 0.44861800  |
| C  | 3.10846600  | -1.74540400 | 1.38038000  |
| H  | 3.71643200  | -2.65422500 | 1.36441300  |
| H  | 3.75638700  | -0.87820200 | 1.51614600  |
| H  | 2.41463200  | -1.79081900 | 2.22089200  |
| H  | 0.28230700  | -0.68497500 | 2.69321800  |

|   |             |             |             |
|---|-------------|-------------|-------------|
| C | -1.91046400 | -0.91219500 | 0.03210300  |
| C | -3.22708200 | -0.75933200 | 0.51362400  |
| C | -1.77291700 | -1.28827100 | -1.31856600 |
| C | -4.33496900 | -0.99912100 | -0.29594500 |
| H | -3.37992700 | -0.43075000 | 1.53457100  |
| C | -2.87719900 | -1.54142400 | -2.12583100 |
| H | -0.77525300 | -1.36805000 | -1.73447400 |
| C | -4.16890500 | -1.40104100 | -1.61956700 |
| H | -5.33298000 | -0.86897900 | 0.11023800  |
| H | -2.72970300 | -1.83941700 | -3.15886400 |
| H | -5.03083100 | -1.58987700 | -2.24972100 |
| C | -1.52974200 | -1.87494200 | 2.97704300  |
| H | -0.94941500 | -2.63386700 | 3.51525700  |
| H | -2.06246100 | -1.29787800 | 3.74460000  |
| H | -2.27734400 | -2.38952700 | 2.37182000  |
| C | 2.49764300  | 1.47484600  | -1.09433200 |
| H | 2.34796400  | 2.55224400  | -1.20774100 |
| H | 3.43813700  | 1.34101600  | -0.54682300 |
| H | 2.62566700  | 1.05976800  | -2.09979000 |

#### M4<sub>Me</sub>-Ac-b

|                                              |             |             |                             |
|----------------------------------------------|-------------|-------------|-----------------------------|
| Zero-point correction=                       |             |             | 0.414977 (Hartree/Particle) |
| Thermal correction to Energy=                |             |             | 0.443230                    |
| Thermal correction to Enthalpy=              |             |             | 0.444174                    |
| Thermal correction to Gibbs Free Energy=     |             |             | 0.355071                    |
| Sum of electronic and zero-point Energies=   |             |             | -1437.059784                |
| Sum of electronic and thermal Energies=      |             |             | -1437.031532                |
| Sum of electronic and thermal Enthalpies=    |             |             | -1437.030587                |
| Sum of electronic and thermal Free Energies= |             |             | -1437.119691                |
| Pd                                           | 0.91788600  | -0.46243900 | -0.21167900                 |
| C                                            | -2.02180000 | -0.41790100 | 0.36906700                  |
| C                                            | -3.50166100 | -0.38624300 | 0.30374700                  |
| C                                            | -4.23849100 | -1.06995600 | 1.28806100                  |
| C                                            | -4.23007600 | 0.33772900  | -0.65636700                 |
| C                                            | -5.62878200 | -1.06213600 | 1.29455000                  |
| H                                            | -3.70113900 | -1.62333500 | 2.05187400                  |
| C                                            | -5.62281400 | 0.34708700  | -0.65204500                 |
| H                                            | -3.70158900 | 0.91993100  | -1.40097000                 |
| C                                            | -6.33188800 | -0.35643200 | 0.31881400                  |
| H                                            | -6.16629300 | -1.60760500 | 2.06321400                  |
| H                                            | -6.15617700 | 0.91726900  | -1.40562300                 |
| H                                            | -7.41612400 | -0.34678200 | 0.32189100                  |
| C                                            | -1.11462000 | -0.45014500 | -0.62685100                 |
| P                                            | 0.75557700  | 1.95396100  | 0.08975400                  |

|   |             |             |             |
|---|-------------|-------------|-------------|
| P | 3.29296500  | -0.75314200 | 0.20893300  |
| C | 2.22531600  | 3.08863600  | 0.04139900  |
| H | 2.96381400  | 2.78546600  | 0.78589400  |
| H | 2.69276900  | 3.04014800  | -0.94449100 |
| H | 1.93641200  | 4.12452500  | 0.24051000  |
| C | 0.02709100  | 2.38054900  | 1.73228700  |
| H | 0.68829000  | 2.03362700  | 2.52891800  |
| H | -0.12752200 | 3.45792700  | 1.83762900  |
| H | -0.92988100 | 1.86688600  | 1.83380100  |
| C | -0.37793900 | 2.84504200  | -1.06343200 |
| H | -1.36116000 | 2.37653700  | -1.02283900 |
| H | -0.46779000 | 3.90097000  | -0.79409400 |
| H | 0.00036700  | 2.76773100  | -2.08454600 |
| C | 4.45291900  | 0.08468400  | -0.96587300 |
| H | 4.24167500  | -0.25950600 | -1.98021700 |
| H | 4.29787600  | 1.16389800  | -0.93676700 |
| H | 5.49783000  | -0.13201700 | -0.72615500 |
| C | 3.95284500  | -2.47733900 | 0.17003800  |
| H | 3.75509500  | -2.92389000 | -0.80534900 |
| H | 5.02887300  | -2.49138600 | 0.36226500  |
| H | 3.44446500  | -3.08375300 | 0.92074900  |
| C | 3.93228900  | -0.17952500 | 1.85044700  |
| H | 5.00808900  | -0.34952500 | 1.94927400  |
| H | 3.72950800  | 0.88460500  | 1.98136500  |
| H | 3.41291700  | -0.72022200 | 2.64425700  |
| C | -1.45964800 | -0.54591000 | -2.09226700 |
| H | -0.86377800 | -1.33444900 | -2.56048100 |
| H | -2.51557000 | -0.76599800 | -2.27883100 |
| H | -1.20849400 | 0.37938100  | -2.62500900 |
| H | -1.64694600 | -0.47969300 | 1.39014200  |
| C | 0.70074000  | -2.55098500 | -0.42836100 |
| H | 1.06038500  | -3.03941600 | 0.48169000  |
| H | -0.33448000 | -2.84265400 | -0.59252700 |
| H | 1.30679100  | -2.88167900 | -1.27791300 |

### TS3Me-Ac

|                                              |                             |
|----------------------------------------------|-----------------------------|
| Zero-point correction=                       | 0.414214 (Hartree/Particle) |
| Thermal correction to Energy=                | 0.441953                    |
| Thermal correction to Enthalpy=              | 0.442897                    |
| Thermal correction to Gibbs Free Energy=     | 0.354235                    |
| Sum of electronic and zero-point Energies=   | -1437.034355                |
| Sum of electronic and thermal Energies=      | -1437.006616                |
| Sum of electronic and thermal Enthalpies=    | -1437.005672                |
| Sum of electronic and thermal Free Energies= | -1437.094334                |

|    |             |             |             |
|----|-------------|-------------|-------------|
| Pd | 0.94636600  | -0.35443500 | -0.33052800 |
| C  | -1.90082300 | -0.87998700 | 0.19048800  |
| C  | -3.33818700 | -0.61957700 | 0.27383100  |
| C  | -3.99871800 | -0.98501300 | 1.46994900  |
| C  | -4.13547700 | -0.00926500 | -0.72027000 |
| C  | -5.35746100 | -0.77507800 | 1.65730600  |
| H  | -3.41810100 | -1.44991300 | 2.26067400  |
| C  | -5.49843800 | 0.19916500  | -0.53018500 |
| H  | -3.69197700 | 0.31816600  | -1.64857100 |
| C  | -6.12463600 | -0.18141400 | 0.65446400  |
| H  | -5.82238100 | -1.07688000 | 2.59026700  |
| H  | -6.07604800 | 0.67066400  | -1.31886200 |
| H  | -7.18650800 | -0.01552900 | 0.79602800  |
| C  | -1.02012200 | -0.80274500 | -0.84959100 |
| P  | 0.68939800  | 2.03334300  | -0.00165000 |
| P  | 3.24956800  | -0.79120800 | 0.37682300  |
| C  | 2.10433100  | 3.23525600  | -0.06262300 |
| H  | 2.88711800  | 2.91713500  | 0.62932800  |
| H  | 2.52735300  | 3.24791100  | -1.06965700 |
| H  | 1.79293700  | 4.25010400  | 0.20277300  |
| C  | 0.02827700  | 2.33438900  | 1.69945600  |
| H  | 0.75106300  | 1.99165900  | 2.44225200  |
| H  | -0.19362900 | 3.39122200  | 1.87444600  |
| H  | -0.88503900 | 1.74883800  | 1.82141300  |
| C  | -0.56535500 | 2.94739600  | -1.01226200 |
| H  | -1.52717700 | 2.43888000  | -0.92813500 |
| H  | -0.68087800 | 3.98112000  | -0.67276700 |
| H  | -0.26639900 | 2.94844000  | -2.06232300 |
| C  | 4.60052800  | -0.09590100 | -0.68517000 |
| H  | 4.48215100  | -0.46817700 | -1.70485200 |
| H  | 4.51568400  | 0.99209900  | -0.71606300 |
| H  | 5.59546200  | -0.36700900 | -0.31955700 |
| C  | 3.74398600  | -2.57600900 | 0.44039700  |
| H  | 3.58132800  | -3.03396400 | -0.53758700 |
| H  | 4.79252000  | -2.70533300 | 0.72378800  |
| H  | 3.11190500  | -3.09948200 | 1.16075600  |
| C  | 3.79534700  | -0.23046900 | 2.05823300  |
| H  | 4.82934900  | -0.51714900 | 2.27191700  |
| H  | 3.70904400  | 0.85559100  | 2.12989100  |
| H  | 3.14119700  | -0.66934700 | 2.81430600  |
| C  | -1.40155600 | -0.48702700 | -2.27884800 |
| H  | -0.58038800 | -0.71078100 | -2.96129100 |
| H  | -2.27915000 | -1.05497900 | -2.60886100 |
| H  | -1.63305400 | 0.57617200  | -2.39494100 |



|   |             |             |             |
|---|-------------|-------------|-------------|
| H | -1.48429200 | -1.22259500 | 1.13530700  |
| C | 0.18397700  | -2.39986500 | -0.88389200 |
| H | 0.13300200  | -2.92581700 | 0.06846000  |
| H | -0.58030900 | -2.79940000 | -1.54736300 |
| H | 1.14386800  | -2.58278900 | -1.38180800 |

### M5Me-Ac

Zero-point correction= 0.417475 (Hartree/Particle)

Thermal correction to Energy= 0.446154

Thermal correction to Enthalpy= 0.447099

Thermal correction to Gibbs Free Energy= 0.351959

Sum of electronic and zero-point Energies= -1437.113360

Sum of electronic and thermal Energies= -1437.084681

Sum of electronic and thermal Enthalpies= -1437.083737

Sum of electronic and thermal Free Energies= -1437.178876

|    |             |             |             |
|----|-------------|-------------|-------------|
| Pd | -1.69561900 | 0.11575300  | -0.02596700 |
| C  | 2.38558100  | 0.21409800  | 1.04899100  |
| C  | 2.87523700  | -0.52345600 | -0.12966500 |
| C  | 1.96849600  | -0.78760700 | -1.17307300 |
| C  | 4.18007100  | -1.02988200 | -0.25405400 |
| C  | 2.36262500  | -1.48489400 | -2.31019500 |
| H  | 0.94082300  | -0.44355700 | -1.07539200 |
| C  | 4.57187500  | -1.73187800 | -1.39131200 |
| H  | 4.88554200  | -0.90534400 | 0.55737400  |
| C  | 3.67014300  | -1.95481700 | -2.42937200 |
| H  | 1.64489200  | -1.66635200 | -3.10319100 |
| H  | 5.58398200  | -2.11610200 | -1.46029600 |
| H  | 3.97824700  | -2.50125700 | -3.31382400 |
| C  | 3.03628500  | 1.06533400  | 1.86240400  |
| P  | -1.43528200 | 2.31861900  | -0.72423300 |
| P  | -2.12663300 | -2.07974200 | 0.60087800  |
| C  | -2.99449500 | 3.27826600  | -1.00304700 |
| H  | -3.59910300 | 2.77244500  | -1.75797100 |
| H  | -3.57140300 | 3.30761200  | -0.07697400 |
| H  | -2.78840600 | 4.30159400  | -1.33217500 |
| C  | -0.56142500 | 2.59800000  | -2.33323200 |
| H  | -1.08886400 | 2.06543600  | -3.12684200 |
| H  | -0.50762400 | 3.66102600  | -2.58847400 |
| H  | 0.45018000  | 2.19260400  | -2.27199300 |
| C  | -0.50403000 | 3.47225400  | 0.38429200  |
| H  | 0.50603600  | 3.08678500  | 0.53443300  |
| H  | -0.44737500 | 4.48237500  | -0.03333000 |
| H  | -0.99667500 | 3.51305800  | 1.35758500  |
| C  | -3.41872100 | -2.33414900 | 1.90337900  |

|   |             |             |             |
|---|-------------|-------------|-------------|
| H | -3.11075900 | -1.83011800 | 2.82131600  |
| H | -4.35691600 | -1.88457900 | 1.57334700  |
| H | -3.58148400 | -3.39600100 | 2.11339700  |
| C | -0.74013100 | -3.10223900 | 1.27911200  |
| H | -0.35509300 | -2.63336900 | 2.18660900  |
| H | -1.06405700 | -4.12134300 | 1.51208400  |
| H | 0.07328100  | -3.13983000 | 0.55241300  |
| C | -2.75758600 | -3.19108500 | -0.73985600 |
| H | -2.96529000 | -4.20030900 | -0.37044300 |
| H | -3.67109800 | -2.76637800 | -1.15982600 |
| H | -2.01636100 | -3.24747200 | -1.53910000 |
| C | 4.46758000  | 1.51072700  | 1.69638700  |
| H | 4.55305000  | 2.58116900  | 1.91183900  |
| H | 5.13111800  | 0.99861700  | 2.40464500  |
| H | 4.84783000  | 1.33365000  | 0.69069100  |
| H | 1.32566600  | 0.06089900  | 1.24674800  |
| C | 2.32246200  | 1.67735800  | 3.04239900  |
| H | 1.28878200  | 1.33521100  | 3.11527400  |
| H | 2.83315400  | 1.42331800  | 3.97964900  |
| H | 2.32135700  | 2.77226100  | 2.97829400  |

### **MI<sub>Me</sub>'-Ac-a**

|                                              |             |             |                             |
|----------------------------------------------|-------------|-------------|-----------------------------|
| Zero-point correction=                       |             |             | 0.428767 (Hartree/Particle) |
| Thermal correction to Energy=                |             |             | 0.461434                    |
| Thermal correction to Enthalpy=              |             |             | 0.462378                    |
| Thermal correction to Gibbs Free Energy=     |             |             | 0.360378                    |
| Sum of electronic and zero-point Energies=   |             |             | -1625.701745                |
| Sum of electronic and thermal Energies=      |             |             | -1625.669078                |
| Sum of electronic and thermal Enthalpies=    |             |             | -1625.668134                |
| Sum of electronic and thermal Free Energies= |             |             | -1625.770135                |
| Pd                                           | -0.56212700 | -0.52141900 | -0.39099900                 |
| C                                            | 1.33111400  | -0.20414600 | -1.34621300                 |
| C                                            | 0.41892400  | 0.00533900  | -2.19606600                 |
| P                                            | -2.93327600 | -0.40948400 | -0.68005500                 |
| P                                            | -0.21388900 | -1.22600700 | 1.89606800                  |
| C                                            | -3.87349700 | -2.00713500 | -0.67985500                 |
| H                                            | -3.48945100 | -2.65095900 | -1.47366600                 |
| H                                            | -3.72429800 | -2.52254400 | 0.27060300                  |
| H                                            | -4.94464400 | -1.84757600 | -0.83634600                 |
| C                                            | -3.56849200 | 0.35012000  | -2.24603800                 |
| H                                            | -3.18355500 | -0.21020100 | -3.09998800                 |
| H                                            | -4.66217600 | 0.35675100  | -2.28472400                 |
| H                                            | -3.20173600 | 1.37544100  | -2.32271700                 |
| C                                            | -3.88553100 | 0.56900000  | 0.57303900                  |

|   |             |             |             |
|---|-------------|-------------|-------------|
| H | -3.49492100 | 1.58816300  | 0.59502800  |
| H | -4.95586200 | 0.59695600  | 0.34747500  |
| H | -3.74219400 | 0.13181200  | 1.56332700  |
| C | 1.46458400  | -1.88588700 | 2.30207600  |
| H | 1.67295100  | -2.75171200 | 1.67042100  |
| H | 2.21654100  | -1.12734900 | 2.08150300  |
| H | 1.54142300  | -2.17965500 | 3.35334200  |
| C | -1.27721300 | -2.60308300 | 2.54186000  |
| H | -1.16234600 | -3.48041900 | 1.90183600  |
| H | -1.01331100 | -2.87573400 | 3.56818900  |
| H | -2.32648900 | -2.30143100 | 2.51739400  |
| C | -0.43666000 | 0.04600500  | 3.22026900  |
| H | -0.20155500 | -0.35592400 | 4.21041400  |
| H | 0.20764800  | 0.90001000  | 3.00566500  |
| H | -1.47150600 | 0.39621500  | 3.21619600  |
| C | 0.03145600  | 0.41842900  | -3.56320400 |
| H | -0.57771100 | 1.32649300  | -3.54187400 |
| H | 0.91508400  | 0.61543100  | -4.18080800 |
| H | -0.56272100 | -0.35490700 | -4.05899900 |
| C | 0.03421100  | 3.34429500  | 0.86015600  |
| O | 0.86788500  | 2.77080000  | 1.52274200  |
| O | -0.75413800 | 2.73802500  | -0.04192000 |
| H | -0.52774000 | 1.77592000  | -0.09838800 |
| C | 2.72135400  | -0.28409700 | -0.95631300 |
| C | 3.24911100  | 0.57110400  | 0.02772100  |
| C | 3.58132200  | -1.21368500 | -1.56733300 |
| C | 4.59529500  | 0.50400400  | 0.37233600  |
| H | 2.59372400  | 1.28516200  | 0.51341200  |
| C | 4.92419300  | -1.28158200 | -1.20885000 |
| H | 3.18348400  | -1.88132400 | -2.32291100 |
| C | 5.43932400  | -0.42285600 | -0.23933700 |
| H | 4.98630600  | 1.17832000  | 1.12686500  |
| H | 5.57113900  | -2.00681800 | -1.69102200 |
| H | 6.48637500  | -0.47591700 | 0.03735900  |
| C | -0.24991600 | 4.82490600  | 0.93800800  |
| H | -0.03452300 | 5.29009700  | -0.02682600 |
| H | -1.30744200 | 4.99342100  | 1.15256000  |
| H | 0.36735400  | 5.27492600  | 1.71231700  |

**TS1<sub>Me</sub>'-Ac-a**

|                                          |                             |
|------------------------------------------|-----------------------------|
| Zero-point correction=                   | 0.423812 (Hartree/Particle) |
| Thermal correction to Energy=            | 0.455614                    |
| Thermal correction to Enthalpy=          | 0.456558                    |
| Thermal correction to Gibbs Free Energy= | 0.356474                    |

|                                              |             |             |              |
|----------------------------------------------|-------------|-------------|--------------|
| Sum of electronic and zero-point Energies=   |             |             | -1625.655659 |
| Sum of electronic and thermal Energies=      |             |             | -1625.623857 |
| Sum of electronic and thermal Enthalpies=    |             |             | -1625.622913 |
| Sum of electronic and thermal Free Energies= |             |             | -1625.722996 |
| Pd                                           | 0.76378900  | -0.18554400 | -0.25780300  |
| C                                            | -1.25596900 | 0.92731300  | -1.24302900  |
| C                                            | -0.19871500 | 0.48424300  | -1.89957100  |
| P                                            | 3.03579700  | 0.18519500  | -0.55571000  |
| P                                            | 0.32561100  | -1.57513700 | 1.73801800   |
| C                                            | 3.84711300  | 1.06294600  | 0.85247100   |
| H                                            | 3.37165700  | 2.03473800  | 0.99521100   |
| H                                            | 3.70860200  | 0.48220200  | 1.76561400   |
| H                                            | 4.91703700  | 1.20685200  | 0.67480000   |
| C                                            | 3.60880300  | 1.18893200  | -1.99874000  |
| H                                            | 3.15744100  | 2.18121500  | -1.94949600  |
| H                                            | 4.69811100  | 1.28979300  | -2.01485100  |
| H                                            | 3.28056000  | 0.71411600  | -2.92491600  |
| C                                            | 4.08357100  | -1.32716200 | -0.72542700  |
| H                                            | 3.77677300  | -1.88426700 | -1.61240900  |
| H                                            | 5.14402600  | -1.07228400 | -0.81143300  |
| H                                            | 3.93940900  | -1.97054300 | 0.14363200   |
| C                                            | -1.12312600 | -1.00509900 | 2.72182700   |
| H                                            | -0.96314500 | 0.01621100  | 3.07146100   |
| H                                            | -1.98678800 | -1.02247900 | 2.05464200   |
| H                                            | -1.30220700 | -1.66088700 | 3.57924000   |
| C                                            | 1.60579900  | -1.86806300 | 3.04636400   |
| H                                            | 1.90777600  | -0.91491700 | 3.48644500   |
| H                                            | 1.22498300  | -2.51591700 | 3.84139700   |
| H                                            | 2.48813500  | -2.33753900 | 2.60529000   |
| C                                            | -0.18007000 | -3.28783400 | 1.28186100   |
| H                                            | -0.40050500 | -3.88786000 | 2.17002200   |
| H                                            | -1.07862700 | -3.20193600 | 0.66688600   |
| H                                            | 0.60990600  | -3.77440200 | 0.70623800   |
| C                                            | 0.01182900  | 0.04335700  | -3.30116200  |
| H                                            | 0.75317800  | -0.75079000 | -3.39509200  |
| H                                            | -0.94734600 | -0.31030600 | -3.69673800  |
| H                                            | 0.32645200  | 0.89066700  | -3.92194300  |
| C                                            | -3.41002900 | -1.57779400 | -1.10100800  |
| O                                            | -2.75167900 | -1.71423900 | -0.05884900  |
| O                                            | -3.31975100 | -0.60193800 | -1.93265000  |
| H                                            | -2.26014700 | 0.26641500  | -1.58433600  |
| C                                            | -1.48195600 | 1.91343900  | -0.18327200  |
| C                                            | -2.64675300 | 1.84809100  | 0.60041300   |
| C                                            | -0.60097900 | 2.99406300  | 0.01860700   |

|   |             |             |             |
|---|-------------|-------------|-------------|
| C | -2.90574500 | 2.81417800  | 1.56632400  |
| H | -3.33208700 | 1.02478900  | 0.44519400  |
| C | -0.86969900 | 3.96053900  | 0.98083200  |
| H | 0.28465100  | 3.07461000  | -0.60101800 |
| C | -2.02083200 | 3.87399700  | 1.76383200  |
| H | -3.80793100 | 2.74326000  | 2.16414600  |
| H | -0.18342200 | 4.79007300  | 1.11530100  |
| H | -2.23116300 | 4.63063300  | 2.51140700  |
| C | -4.45307200 | -2.62939700 | -1.48777500 |
| H | -5.43938700 | -2.16070300 | -1.53538200 |
| H | -4.23384900 | -3.01846000 | -2.48505500 |
| H | -4.46707400 | -3.44321700 | -0.76321800 |

### M2<sub>Me'</sub>-Ac-a

|                                              |             |             |                             |
|----------------------------------------------|-------------|-------------|-----------------------------|
| Zero-point correction=                       |             |             | 0.430523 (Hartree/Particle) |
| Thermal correction to Energy=                |             |             | 0.461685                    |
| Thermal correction to Enthalpy=              |             |             | 0.462629                    |
| Thermal correction to Gibbs Free Energy=     |             |             | 0.366500                    |
| Sum of electronic and zero-point Energies=   |             |             | -1625.713583                |
| Sum of electronic and thermal Energies=      |             |             | -1625.682422                |
| Sum of electronic and thermal Enthalpies=    |             |             | -1625.681477                |
| Sum of electronic and thermal Free Energies= |             |             | -1625.777607                |
| Pd                                           | 0.47621100  | 0.03087200  | -0.29675400                 |
| C                                            | -2.10218500 | -1.20904500 | -1.29714100                 |
| C                                            | -0.85141700 | -0.83872200 | -1.60089900                 |
| P                                            | -0.44679800 | 2.07120800  | -0.81340100                 |
| P                                            | 2.33468100  | 0.71404000  | 1.18743100                  |
| C                                            | -1.10588900 | 2.96682000  | 0.65564600                  |
| H                                            | -1.88288500 | 2.35643100  | 1.11860900                  |
| H                                            | -0.31266200 | 3.12641300  | 1.38586100                  |
| H                                            | -1.52791700 | 3.93323200  | 0.36692100                  |
| C                                            | -1.86331900 | 2.17868600  | -1.98076600                 |
| H                                            | -2.70763400 | 1.62133700  | -1.57695800                 |
| H                                            | -2.14698900 | 3.22440400  | -2.12822900                 |
| H                                            | -1.59198500 | 1.73707000  | -2.93954100                 |
| C                                            | 0.74025600  | 3.27223200  | -1.55817400                 |
| H                                            | 1.11495800  | 2.86727500  | -2.49985400                 |
| H                                            | 0.25619900  | 4.23384800  | -1.74903300                 |
| H                                            | 1.59067300  | 3.42730400  | -0.89372600                 |
| C                                            | 2.42624100  | -0.39693100 | 2.65244500                  |
| H                                            | 1.61875200  | -0.14514500 | 3.34357300                  |
| H                                            | 2.27216300  | -1.41983100 | 2.31126900                  |
| H                                            | 3.38468600  | -0.30492400 | 3.17010900                  |
| C                                            | 2.58231000  | 2.37397700  | 1.97410800                  |

|   |             |             |             |
|---|-------------|-------------|-------------|
| H | 1.73743600  | 2.60831900  | 2.62498100  |
| H | 3.49653900  | 2.38801200  | 2.57387500  |
| H | 2.65874800  | 3.15249500  | 1.21252800  |
| C | 3.93762400  | 0.45392700  | 0.31914300  |
| H | 4.78291700  | 0.49492100  | 1.01183800  |
| H | 3.90280000  | -0.50747000 | -0.19589900 |
| H | 4.05828600  | 1.22968200  | -0.44042700 |
| C | -0.24490600 | -1.10366800 | -2.95194500 |
| H | 0.70097400  | -1.64239600 | -2.85628800 |
| H | -0.92617400 | -1.68445300 | -3.58713100 |
| H | -0.00757400 | -0.16983700 | -3.47720200 |
| C | 1.92550100  | -2.57379500 | -0.48338000 |
| O | 1.06712500  | -1.95496300 | 0.26265000  |
| O | 2.58370700  | -2.06315000 | -1.39206200 |
| H | -2.68529400 | -1.68588800 | -2.09070800 |
| C | -2.84176400 | -1.01428400 | -0.03805700 |
| C | -4.22827300 | -0.78576000 | -0.07921200 |
| C | -2.22288100 | -1.06289500 | 1.22372700  |
| C | -4.96139900 | -0.56765500 | 1.08385400  |
| H | -4.73223700 | -0.77467700 | -1.04102700 |
| C | -2.95800100 | -0.84656900 | 2.38672200  |
| H | -1.17196800 | -1.31948200 | 1.28157900  |
| C | -4.32738900 | -0.58824700 | 2.32505500  |
| H | -6.02927900 | -0.38665500 | 1.02157300  |
| H | -2.46157300 | -0.90260000 | 3.35005100  |
| H | -4.89667300 | -0.42629500 | 3.23368300  |
| C | 2.06689300  | -4.05916200 | -0.16087800 |
| H | 3.00052000  | -4.44640700 | -0.56822200 |
| H | 2.01359400  | -4.23673800 | 0.91457100  |
| H | 1.23261000  | -4.59536400 | -0.62271800 |

### MI<sub>Me</sub>'w-Ac-b

|                                              |             |             |                             |
|----------------------------------------------|-------------|-------------|-----------------------------|
| Zero-point correction=                       |             |             | 0.453172 (Hartree/Particle) |
| Thermal correction to Energy=                |             |             | 0.489947                    |
| Thermal correction to Enthalpy=              |             |             | 0.490891                    |
| Thermal correction to Gibbs Free Energy=     |             |             | 0.374188                    |
| Sum of electronic and zero-point Energies=   |             |             | -1702.133259                |
| Sum of electronic and thermal Energies=      |             |             | -1702.096484                |
| Sum of electronic and thermal Enthalpies=    |             |             | -1702.095540                |
| Sum of electronic and thermal Free Energies= |             |             | -1702.212243                |
| Pd                                           | 2.87520100  | -0.23557900 | 0.19806000                  |
| C                                            | -2.49153900 | -0.10069300 | -1.07963700                 |
| C                                            | -1.55202000 | 0.63754600  | -0.88494700                 |
| P                                            | 1.75929100  | -1.51984700 | 1.79913600                  |

|   |             |             |             |
|---|-------------|-------------|-------------|
| P | 4.16398400  | 0.88491700  | -1.36191700 |
| C | 1.04827800  | -0.67976600 | 3.28481200  |
| H | 1.83673900  | -0.11588500 | 3.78805100  |
| H | 0.26482700  | 0.01815300  | 2.97975800  |
| H | 0.62812800  | -1.40868000 | 3.98588600  |
| C | 2.79483300  | -2.83352400 | 2.59761700  |
| H | 3.64403000  | -2.36749200 | 3.10083300  |
| H | 2.21905000  | -3.41318400 | 3.32623300  |
| H | 3.18602500  | -3.50514900 | 1.83127200  |
| C | 0.30986500  | -2.51869300 | 1.22698200  |
| H | 0.62366500  | -3.18224000 | 0.41891100  |
| H | -0.11322900 | -3.11653400 | 2.04047800  |
| H | -0.45938900 | -1.85095700 | 0.83557800  |
| C | 5.93600700  | 0.35764900  | -1.48255500 |
| H | 6.41818500  | 0.49263500  | -0.51274600 |
| H | 5.97933900  | -0.70387800 | -1.73266900 |
| H | 6.48122000  | 0.92995500  | -2.23990600 |
| C | 4.36632500  | 2.71774500  | -1.17282400 |
| H | 3.38660700  | 3.19712500  | -1.21668100 |
| H | 4.79918300  | 2.93253900  | -0.19399800 |
| H | 5.00911600  | 3.14087800  | -1.95137400 |
| C | 3.65398000  | 0.77764500  | -3.14063800 |
| H | 3.62140700  | -0.27093500 | -3.44215000 |
| H | 2.64920000  | 1.18875800  | -3.25460000 |
| H | 4.34126700  | 1.32025300  | -3.79762300 |
| C | -0.40375300 | 1.48993000  | -0.61162000 |
| H | -0.30076100 | 2.26944300  | -1.37274100 |
| H | -0.51277500 | 1.95144300  | 0.37375500  |
| H | 0.52368600  | 0.89719300  | -0.59356800 |
| C | -4.58724300 | 2.53472200  | 0.93751500  |
| O | -4.11203200 | 2.51799600  | -0.30974100 |
| O | -1.39334800 | 1.63513000  | 2.48989300  |
| H | -3.42297100 | 1.82513100  | -0.40129200 |
| C | -3.58733100 | -0.99076000 | -1.30954000 |
| C | -4.50452600 | -1.27430800 | -0.28206200 |
| C | -3.76313400 | -1.59990000 | -2.56388800 |
| C | -5.56529400 | -2.14408700 | -0.50882800 |
| H | -4.37604100 | -0.80490900 | 0.68607800  |
| C | -4.82571400 | -2.46931300 | -2.78094800 |
| H | -3.05837000 | -1.38453700 | -3.35789000 |
| C | -5.72987900 | -2.74474800 | -1.75601400 |
| H | -6.26489900 | -2.35518900 | 0.29221100  |
| H | -4.94844900 | -2.93381800 | -3.75294300 |
| H | -6.55740900 | -3.42357700 | -1.92825800 |

|   |             |            |            |
|---|-------------|------------|------------|
| O | -4.16877800 | 1.82622600 | 1.83140400 |
| H | -1.38349700 | 2.25393800 | 3.22566200 |
| H | -2.33506700 | 1.49930300 | 2.29747700 |
| C | -5.70718600 | 3.52847800 | 1.09874700 |
| H | -5.36691500 | 4.52186400 | 0.79835000 |
| H | -6.53490700 | 3.25550800 | 0.44015600 |
| H | -6.04211000 | 3.54108400 | 2.13324100 |

**TS1<sub>Me</sub>'w-Ac-b**

Zero-point correction= 0.448468 (Hartree/Particle)

Thermal correction to Energy= 0.483064

Thermal correction to Enthalpy= 0.484008

Thermal correction to Gibbs Free Energy= 0.378347

Sum of electronic and zero-point Energies= -1702.103043

Sum of electronic and thermal Energies= -1702.068447

Sum of electronic and thermal Enthalpies= -1702.067503

Sum of electronic and thermal Free Energies= -1702.173165

|    |             |             |             |
|----|-------------|-------------|-------------|
| Pd | -0.83398100 | -0.40867000 | -0.50276400 |
| C  | 1.71985500  | 0.91699100  | -0.62565200 |
| C  | 0.86192700  | 0.39335900  | -1.44921700 |
| P  | -2.13634500 | -1.78703800 | 1.14735400  |
| P  | -2.12784300 | 1.35214800  | -1.22632200 |
| C  | -2.40245800 | -3.55607100 | 0.67428100  |
| H  | -3.05469400 | -3.61394000 | -0.19967600 |
| H  | -1.43573600 | -3.98956800 | 0.41457200  |
| H  | -2.84590200 | -4.13487300 | 1.48981100  |
| C  | -3.80650100 | -1.33702000 | 1.81512800  |
| H  | -4.53866100 | -1.31829300 | 1.00459400  |
| H  | -4.14453000 | -2.04666800 | 2.57596800  |
| H  | -3.76616300 | -0.34078600 | 2.26096700  |
| C  | -1.15078100 | -1.96518900 | 2.69861400  |
| H  | -0.99959400 | -0.98365200 | 3.15179200  |
| H  | -1.63771300 | -2.62726400 | 3.42070900  |
| H  | -0.17281300 | -2.36803600 | 2.43222000  |
| C  | -2.63438000 | 2.47304900  | 0.14990700  |
| H  | -3.16281300 | 1.89619000  | 0.91047000  |
| H  | -1.74312600 | 2.90081900  | 0.61032000  |
| H  | -3.28569200 | 3.27561400  | -0.20903800 |
| C  | -3.76185000 | 0.85219700  | -1.93308100 |
| H  | -3.60319500 | 0.26521900  | -2.83948000 |
| H  | -4.29576400 | 0.22902500  | -1.21424400 |
| H  | -4.37471200 | 1.72584300  | -2.17500700 |
| C  | -1.54674000 | 2.55905500  | -2.49721700 |
| H  | -0.59817400 | 2.99176700  | -2.17910800 |



|   |             |             |             |
|---|-------------|-------------|-------------|
| H | -1.38109500 | 2.04271500  | -3.44416100 |
| H | -2.28224700 | 3.35446200  | -2.65017800 |
| C | 1.02301500  | -0.09898000 | -2.85812300 |
| H | 2.07236300  | -0.02229600 | -3.16033800 |
| H | 0.70474300  | -1.13994000 | -2.97251600 |
| H | 0.42682500  | 0.49329100  | -3.55869200 |
| C | 4.23843500  | -1.21750400 | -0.77155100 |
| O | 4.09604400  | -0.01195500 | -1.22677700 |
| O | 0.68463500  | -2.30995900 | -0.19444000 |
| H | 3.05170600  | 0.44457000  | -1.00090500 |
| C | 1.66385900  | 1.52278700  | 0.69781700  |
| C | 2.16730300  | 0.85172800  | 1.83089800  |
| C | 1.19663900  | 2.83966300  | 0.87649800  |
| C | 2.16284500  | 1.45710000  | 3.08248400  |
| H | 2.55743400  | -0.15295700 | 1.71385200  |
| C | 1.20162200  | 3.44382500  | 2.13109600  |
| H | 0.85199000  | 3.39536100  | 0.01123100  |
| C | 1.67765500  | 2.75572300  | 3.24566800  |
| H | 2.54904800  | 0.91275600  | 3.93827500  |
| H | 0.83952000  | 4.46176400  | 2.23614800  |
| H | 1.68489800  | 3.22741000  | 4.22181200  |
| O | 3.35689300  | -1.90457800 | -0.24286800 |
| H | 0.64020400  | -2.86670800 | -0.97824500 |
| H | 1.63093600  | -2.01679800 | -0.16540500 |
| C | 5.64736800  | -1.76202500 | -0.92398700 |
| H | 5.97854000  | -1.65377100 | -1.95892200 |
| H | 6.32737600  | -1.17244600 | -0.30376700 |
| H | 5.68552100  | -2.80681800 | -0.62009400 |

### M2<sub>Me</sub>'w-Ac-b

|                                              |             |             |                             |
|----------------------------------------------|-------------|-------------|-----------------------------|
| Zero-point correction=                       |             |             | 0.455445 (Hartree/Particle) |
| Thermal correction to Energy=                |             |             | 0.488767                    |
| Thermal correction to Enthalpy=              |             |             | 0.489711                    |
| Thermal correction to Gibbs Free Energy=     |             |             | 0.387655                    |
| Sum of electronic and zero-point Energies=   |             |             | -1702.151357                |
| Sum of electronic and thermal Energies=      |             |             | -1702.118035                |
| Sum of electronic and thermal Enthalpies=    |             |             | -1702.117090                |
| Sum of electronic and thermal Free Energies= |             |             | -1702.219146                |
| Pd                                           | -0.83051700 | -0.09296500 | -0.57669300                 |
| C                                            | 1.46657300  | 1.62484300  | -1.60496000                 |
| C                                            | 0.33059800  | 0.97360000  | -1.89084500                 |
| P                                            | -2.09349100 | -1.76882600 | 0.73574500                  |
| P                                            | -1.78178400 | 1.87214900  | 0.17421900                  |
| C                                            | -2.46013300 | -3.19696200 | -0.36166700                 |

|   |             |             |             |
|---|-------------|-------------|-------------|
| H | -3.25139700 | -2.92087500 | -1.06201900 |
| H | -1.55505800 | -3.40324000 | -0.93351000 |
| H | -2.77125900 | -4.07578600 | 0.20905200  |
| C | -3.72206400 | -1.48441200 | 1.57120400  |
| H | -4.46411300 | -1.16459700 | 0.83686000  |
| H | -4.08008300 | -2.40056000 | 2.04876800  |
| H | -3.63289900 | -0.70900700 | 2.33512800  |
| C | -1.09897300 | -2.51284200 | 2.09844600  |
| H | -0.92938600 | -1.76475800 | 2.87598100  |
| H | -1.61789100 | -3.37006000 | 2.53669500  |
| H | -0.12898800 | -2.83185800 | 1.71396800  |
| C | -1.61894300 | 2.10842500  | 1.99479300  |
| H | -2.07463100 | 1.26927300  | 2.52206400  |
| H | -0.55863300 | 2.13981800  | 2.25057000  |
| H | -2.09745000 | 3.03711800  | 2.31733000  |
| C | -3.60011400 | 2.01445200  | -0.11213600 |
| H | -3.79834400 | 1.96821700  | -1.18448100 |
| H | -4.12526400 | 1.18912000  | 0.36800800  |
| H | -3.98518300 | 2.95915400  | 0.28122500  |
| C | -1.18425300 | 3.48548500  | -0.47524500 |
| H | -0.12582500 | 3.60399300  | -0.24634200 |
| H | -1.30304600 | 3.51481800  | -1.55871800 |
| H | -1.75232700 | 4.30351800  | -0.02382000 |
| C | -0.18430200 | 0.88565200  | -3.30477400 |
| H | 0.50299800  | 1.36101000  | -4.01595700 |
| H | -0.32483600 | -0.15623100 | -3.60956800 |
| H | -1.16461100 | 1.36643600  | -3.40708900 |
| C | 2.93611800  | -3.01009200 | -0.29939200 |
| O | 3.13568200  | -2.71804000 | -1.46043900 |
| O | 0.12464100  | -1.81759400 | -1.28074300 |
| H | 1.98073900  | 2.11284600  | -2.43816800 |
| C | 2.11070600  | 1.84647300  | -0.29854000 |
| C | 2.04933200  | 0.92448400  | 0.76056100  |
| C | 2.83897800  | 3.03157900  | -0.09091000 |
| C | 2.65708900  | 1.19903700  | 1.98315100  |
| H | 1.56039800  | -0.02937300 | 0.60644400  |
| C | 3.44253400  | 3.30757800  | 1.13242200  |
| H | 2.92549900  | 3.74495600  | -0.90483000 |
| C | 3.34829300  | 2.39421000  | 2.18096900  |
| H | 2.60893700  | 0.46265600  | 2.77855300  |
| H | 3.99296000  | 4.23290600  | 1.26493000  |
| H | 3.82507600  | 2.60137400  | 3.13259900  |
| O | 1.77289900  | -2.83543700 | 0.32312700  |
| H | 0.75771000  | -1.58371100 | -1.96956600 |

|   |            |             |             |
|---|------------|-------------|-------------|
| H | 1.08252800 | -2.41785300 | -0.34629000 |
| C | 3.99407000 | -3.60770400 | 0.60570500  |
| H | 4.90254300 | -3.79779600 | 0.03744000  |
| H | 4.20929000 | -2.91456000 | 1.42310900  |
| H | 3.62660300 | -4.53470100 | 1.05178800  |

### M2<sub>Me</sub>'-Ac-c

Zero-point correction= 0.430290 (Hartree/Particle)

|                                              |              |
|----------------------------------------------|--------------|
| Thermal correction to Energy=                | 0.461659     |
| Thermal correction to Enthalpy=              | 0.462603     |
| Thermal correction to Gibbs Free Energy=     | 0.364411     |
| Sum of electronic and zero-point Energies=   | -1625.730335 |
| Sum of electronic and thermal Energies=      | -1625.698967 |
| Sum of electronic and thermal Enthalpies=    | -1625.698023 |
| Sum of electronic and thermal Free Energies= | -1625.796214 |

|    |             |             |             |
|----|-------------|-------------|-------------|
| Pd | 0.57759400  | 0.08908000  | 0.30060100  |
| C  | -2.22323900 | -0.35738000 | 1.40493600  |
| C  | -0.90580500 | -0.23247800 | 1.64840500  |
| P  | 0.95832800  | -2.26879300 | 0.17220000  |
| P  | 0.20023800  | 2.42616700  | 0.35719000  |
| C  | 1.56249000  | -2.86701600 | -1.45934500 |
| H  | 0.88589200  | -2.53637100 | -2.24900600 |
| H  | 2.55219000  | -2.44603000 | -1.62920600 |
| H  | 1.61637600  | -3.95929500 | -1.46681800 |
| C  | -0.50346000 | -3.35181300 | 0.46759000  |
| H  | -1.28887500 | -3.11314600 | -0.25126700 |
| H  | -0.22623000 | -4.40439200 | 0.36518200  |
| H  | -0.90274300 | -3.17598600 | 1.46641800  |
| C  | 2.20579000  | -2.91644900 | 1.35603500  |
| H  | 1.87947700  | -2.73018800 | 2.38071200  |
| H  | 2.34708500  | -3.99207400 | 1.21756500  |
| H  | 3.13717600  | -2.38397900 | 1.16856800  |
| C  | 1.67004700  | 3.34650800  | 0.96881200  |
| H  | 1.84690700  | 3.10544700  | 2.01843700  |
| H  | 2.53449800  | 3.02348300  | 0.38881000  |
| H  | 1.53590600  | 4.42657400  | 0.86442500  |
| C  | -1.19801400 | 3.15145200  | 1.30493600  |
| H  | -1.08572900 | 2.92236200  | 2.36581100  |
| H  | -1.23624100 | 4.23605500  | 1.17338700  |
| H  | -2.13312300 | 2.70779400  | 0.96164300  |
| C  | -0.03526000 | 3.07424000  | -1.34471500 |
| H  | -0.04102000 | 4.16747300  | -1.35746400 |
| H  | 0.78372800  | 2.69258000  | -1.95488600 |
| H  | -0.97920100 | 2.70195100  | -1.74625700 |

|   |             |             |             |
|---|-------------|-------------|-------------|
| C | -0.41007800 | -0.27286000 | 3.07514500  |
| H | 0.11612100  | 0.65000700  | 3.34452200  |
| H | -1.23218500 | -0.41408200 | 3.78806900  |
| H | 0.31337800  | -1.08018000 | 3.23051200  |
| C | 3.28790200  | 0.21161500  | -1.11468200 |
| O | 3.66785300  | -0.73318200 | -0.41861500 |
| O | 2.10413900  | 0.72695900  | -1.10766100 |
| H | -2.86276600 | -0.48756800 | 2.28274000  |
| C | -2.98749200 | -0.33834700 | 0.14897500  |
| C | -4.39172800 | -0.40940300 | 0.22496400  |
| C | -2.41902800 | -0.25644200 | -1.13614000 |
| C | -5.18771700 | -0.39254000 | -0.91513000 |
| H | -4.85999100 | -0.47888900 | 1.20191200  |
| C | -3.21455700 | -0.24007100 | -2.27760300 |
| H | -1.33937400 | -0.20791600 | -1.23536900 |
| C | -4.60382700 | -0.30654600 | -2.17749900 |
| H | -6.26669800 | -0.44753700 | -0.81768200 |
| H | -2.74447100 | -0.17825300 | -3.25361100 |
| H | -5.22050400 | -0.29414600 | -3.06909100 |
| C | 4.24460200  | 0.86036800  | -2.11484100 |
| H | 5.24120600  | 0.43149200  | -2.01909700 |
| H | 3.87394600  | 0.69871300  | -3.13079100 |
| H | 4.28775800  | 1.94056500  | -1.95548900 |

#### M4<sub>ph</sub><sup>2</sup>-Ac-a

|                                              |             |             |                             |
|----------------------------------------------|-------------|-------------|-----------------------------|
| Zero-point correction=                       |             |             | 0.414483 (Hartree/Particle) |
| Thermal correction to Energy=                |             |             | 0.442669                    |
| Thermal correction to Enthalpy=              |             |             | 0.443614                    |
| Thermal correction to Gibbs Free Energy=     |             |             | 0.355771                    |
| Sum of electronic and zero-point Energies=   |             |             | -1437.066912                |
| Sum of electronic and thermal Energies=      |             |             | -1437.038725                |
| Sum of electronic and thermal Enthalpies=    |             |             | -1437.037781                |
| Sum of electronic and thermal Free Energies= |             |             | -1437.125623                |
| Pd                                           | -0.79676600 | 0.44953500  | -0.11106100                 |
| C                                            | 0.60541800  | -0.77423500 | 2.35364400                  |
| C                                            | 0.70287900  | -0.57096200 | 1.02940700                  |
| P                                            | -2.16135900 | -1.45458000 | -0.21335800                 |
| P                                            | 0.49484000  | 2.40540800  | -0.12210600                 |
| C                                            | -2.45572400 | -2.08663700 | -1.92196900                 |
| H                                            | -2.84110000 | -1.28314600 | -2.54966700                 |
| H                                            | -1.51083100 | -2.42966200 | -2.34736700                 |
| H                                            | -3.16556400 | -2.91831800 | -1.91820300                 |
| C                                            | -3.87231800 | -1.18068400 | 0.41870000                  |
| H                                            | -4.31845300 | -0.33083600 | -0.09826800                 |

|   |             |             |             |
|---|-------------|-------------|-------------|
| H | -4.49737600 | -2.06622600 | 0.27373200  |
| H | -3.82681000 | -0.94742500 | 1.48395800  |
| C | -1.66220000 | -2.99071500 | 0.67217100  |
| H | -1.56061700 | -2.78028200 | 1.73664800  |
| H | -2.39886100 | -3.78509300 | 0.52274000  |
| H | -0.68856800 | -3.31955000 | 0.30694900  |
| C | -0.42191500 | 3.97963800  | 0.16416500  |
| H | -1.24209400 | 4.06301200  | -0.54868700 |
| H | -0.84551200 | 3.96940300  | 1.17028800  |
| H | 0.23795200  | 4.84557200  | 0.06291900  |
| C | 1.30957100  | 2.68793800  | -1.75076400 |
| H | 0.54912300  | 2.74284000  | -2.53089800 |
| H | 1.89712300  | 3.61024700  | -1.75040600 |
| H | 1.96373700  | 1.84220500  | -1.96879400 |
| C | 1.89986200  | 2.56523700  | 1.05647800  |
| H | 2.41124000  | 3.52346000  | 0.92853800  |
| H | 1.52690600  | 2.48572800  | 2.07838600  |
| H | 2.60437500  | 1.74991100  | 0.89136400  |
| H | 1.37365500  | -1.35933200 | 2.86958300  |
| C | 1.89237500  | -1.07446100 | 0.29869500  |
| C | 1.79165100  | -1.51235300 | -1.03579100 |
| C | 3.17722800  | -1.10829100 | 0.87950100  |
| C | 2.89479900  | -1.99289200 | -1.73640000 |
| H | 0.82480300  | -1.46246300 | -1.52480900 |
| C | 4.28350900  | -1.58081900 | 0.17945800  |
| H | 3.30559600  | -0.74545400 | 1.89321700  |
| C | 4.15047400  | -2.03233100 | -1.13289200 |
| H | 2.77483200  | -2.33071700 | -2.76076500 |
| H | 5.25721100  | -1.58927100 | 0.65890600  |
| H | 5.01321200  | -2.39609600 | -1.67974400 |
| C | -0.50269100 | -0.28627900 | 3.24686100  |
| H | -1.01053100 | -1.11599500 | 3.75749100  |
| H | -0.11820700 | 0.36578500  | 4.04224100  |
| H | -1.24738500 | 0.27748600  | 2.67904800  |
| C | -2.30319200 | 1.50713300  | -1.25221300 |
| H | -3.00438400 | 0.85398100  | -1.78024800 |
| H | -2.88685100 | 2.12735500  | -0.56155400 |
| H | -1.86594900 | 2.16615400  | -2.01014300 |

#### M4<sub>Me</sub>'-Ac-b

|                                          |                             |
|------------------------------------------|-----------------------------|
| Zero-point correction=                   | 0.415217 (Hartree/Particle) |
| Thermal correction to Energy=            | 0.443191                    |
| Thermal correction to Enthalpy=          | 0.444136                    |
| Thermal correction to Gibbs Free Energy= | 0.356703                    |

|                                              |             |             |              |
|----------------------------------------------|-------------|-------------|--------------|
| Sum of electronic and zero-point Energies=   |             |             | -1437.065765 |
| Sum of electronic and thermal Energies=      |             |             | -1437.037790 |
| Sum of electronic and thermal Enthalpies=    |             |             | -1437.036846 |
| Sum of electronic and thermal Free Energies= |             |             | -1437.124279 |
| Pd                                           | 0.65364200  | -0.17315900 | 0.62653100   |
| C                                            | -2.26492700 | 0.13013800  | 1.58799000   |
| C                                            | -0.95382900 | 0.29595100  | 1.84214200   |
| P                                            | 2.68030100  | -0.91661800 | -0.48307700  |
| P                                            | 0.30600600  | 1.91105000  | -0.59776700  |
| C                                            | 4.20723500  | -0.14656300 | 0.22157000   |
| H                                            | 4.16552800  | 0.93700900  | 0.09807900   |
| H                                            | 4.24980100  | -0.36037900 | 1.29109700   |
| H                                            | 5.11387800  | -0.52738700 | -0.25710500  |
| C                                            | 2.92348500  | -0.64727400 | -2.30061600  |
| H                                            | 2.85596300  | 0.41542300  | -2.53821500  |
| H                                            | 3.89484200  | -1.02166600 | -2.63518500  |
| H                                            | 2.13649700  | -1.16763800 | -2.85051300  |
| C                                            | 3.08760900  | -2.71352200 | -0.36057000  |
| H                                            | 2.32115800  | -3.29667800 | -0.87460600  |
| H                                            | 4.06164400  | -2.92948400 | -0.80782700  |
| H                                            | 3.09350700  | -3.01990800 | 0.68565900   |
| C                                            | 1.75537300  | 3.00778600  | -0.97121700  |
| H                                            | 2.23152800  | 3.31061000  | -0.03628000  |
| H                                            | 2.49415900  | 2.47447400  | -1.57139900  |
| H                                            | 1.44556600  | 3.90433100  | -1.51554600  |
| C                                            | -0.84698100 | 3.13754400  | 0.15681100   |
| H                                            | -0.44620500 | 3.47453900  | 1.11450800   |
| H                                            | -0.98526800 | 4.00144400  | -0.49905800  |
| H                                            | -1.80605600 | 2.65648400  | 0.34636200   |
| C                                            | -0.44089500 | 1.68920600  | -2.27361400  |
| H                                            | -0.61655800 | 2.65047600  | -2.76480100  |
| H                                            | 0.21868200  | 1.08397200  | -2.89808500  |
| H                                            | -1.38693900 | 1.15618400  | -2.16755600  |
| C                                            | -0.53775900 | 0.90032200  | 3.16089800   |
| H                                            | -1.40119500 | 1.19209000  | 3.77429900   |
| H                                            | 0.06460900  | 0.19072600  | 3.73827100   |
| H                                            | 0.09264600  | 1.78611400  | 3.02011700   |
| H                                            | -2.96388700 | 0.48138300  | 2.35431800   |
| C                                            | -2.94529100 | -0.43262000 | 0.41170300   |
| C                                            | -2.30367200 | -1.19378300 | -0.58263200  |
| C                                            | -4.32841700 | -0.21720600 | 0.26242500   |
| C                                            | -3.00653200 | -1.69177400 | -1.67506800  |
| H                                            | -1.24398400 | -1.40058700 | -0.47615300  |
| C                                            | -5.03191700 | -0.71326300 | -0.83034800  |

|   |             |             |             |
|---|-------------|-------------|-------------|
| H | -4.85390900 | 0.35279800  | 1.02274100  |
| C | -4.37429900 | -1.45277000 | -1.81163700 |
| H | -2.48491000 | -2.28249100 | -2.42168900 |
| H | -6.09719200 | -0.52486800 | -0.91437500 |
| H | -4.91960500 | -1.84550100 | -2.66269600 |
| C | 0.69067900  | -1.93500200 | 1.80102600  |
| H | 1.61789800  | -1.95185900 | 2.38368200  |
| H | -0.15661100 | -1.98918500 | 2.48104300  |
| H | 0.66312300  | -2.80461900 | 1.13995600  |

### TS3<sub>Me'</sub>-Ac

|                                              |             |             |                             |
|----------------------------------------------|-------------|-------------|-----------------------------|
| Zero-point correction=                       |             |             | 0.413875 (Hartree/Particle) |
| Thermal correction to Energy=                |             |             | 0.441707                    |
| Thermal correction to Enthalpy=              |             |             | 0.442652                    |
| Thermal correction to Gibbs Free Energy=     |             |             | 0.354644                    |
| Sum of electronic and zero-point Energies=   |             |             | -1437.038362                |
| Sum of electronic and thermal Energies=      |             |             | -1437.010529                |
| Sum of electronic and thermal Enthalpies=    |             |             | -1437.009585                |
| Sum of electronic and thermal Free Energies= |             |             | -1437.097593                |
| Pd                                           | 0.64228400  | 0.03105800  | 0.60512000                  |
| C                                            | -2.28935200 | 0.63350300  | 1.28967800                  |
| C                                            | -1.00646400 | 0.59727000  | 1.75676800                  |
| P                                            | 2.47650700  | -1.41710800 | -0.17239100                 |
| P                                            | 0.76242000  | 1.95578100  | -0.84025300                 |
| C                                            | 4.20243300  | -0.83494600 | 0.17427000                  |
| H                                            | 4.37181200  | 0.12310700  | -0.32074600                 |
| H                                            | 4.32141800  | -0.68056900 | 1.24865500                  |
| H                                            | 4.95478500  | -1.55154600 | -0.16872500                 |
| C                                            | 2.59445900  | -1.80728900 | -1.98144900                 |
| H                                            | 2.69589000  | -0.87953300 | -2.54858500                 |
| H                                            | 3.44559200  | -2.45618600 | -2.20850900                 |
| H                                            | 1.67596100  | -2.30030300 | -2.30654100                 |
| C                                            | 2.54125100  | -3.12424400 | 0.54738600                  |
| H                                            | 1.62069500  | -3.65711200 | 0.30061700                  |
| H                                            | 3.39652200  | -3.69529700 | 0.17478100                  |
| H                                            | 2.60687200  | -3.05962100 | 1.63565300                  |
| C                                            | 2.38285200  | 2.70241100  | -1.35056300                 |
| H                                            | 2.92633400  | 3.02995500  | -0.46185800                 |
| H                                            | 2.98954700  | 1.95039800  | -1.85954400                 |
| H                                            | 2.24787300  | 3.55698100  | -2.02054800                 |
| C                                            | -0.15529300 | 3.46459900  | -0.29182100                 |
| H                                            | 0.36505200  | 3.92353600  | 0.55132300                  |
| H                                            | -0.24318600 | 4.19969600  | -1.09669400                 |
| H                                            | -1.15126700 | 3.16765600  | 0.04281500                  |

|   |             |             |             |
|---|-------------|-------------|-------------|
| C | -0.02508900 | 1.64535600  | -2.48712600 |
| H | -0.01726000 | 2.54124200  | -3.11522100 |
| H | 0.50552100  | 0.84284200  | -3.00346100 |
| H | -1.05519100 | 1.32000700  | -2.33217200 |
| C | -0.63216100 | 1.57211500  | 2.85969000  |
| H | -1.52074300 | 2.03276300  | 3.30747700  |
| H | -0.06538500 | 1.08596800  | 3.65841100  |
| H | 0.00324200  | 2.37538000  | 2.47549600  |
| H | -2.95557600 | 1.34406100  | 1.78191100  |
| C | -2.94966000 | -0.17515000 | 0.27155600  |
| C | -2.27886100 | -1.00629300 | -0.65049700 |
| C | -4.35822000 | -0.13407600 | 0.18026500  |
| C | -2.97821800 | -1.76742800 | -1.58188000 |
| H | -1.19301700 | -1.03501300 | -0.63648800 |
| C | -5.05432800 | -0.88669200 | -0.75632600 |
| H | -4.90675000 | 0.49911000  | 0.87094600  |
| C | -4.36997400 | -1.71666800 | -1.64514000 |
| H | -2.42966700 | -2.39793200 | -2.27487400 |
| H | -6.13732900 | -0.82866100 | -0.79276000 |
| H | -4.91076400 | -2.30468200 | -2.37815800 |
| C | -0.37311500 | -1.18922800 | 2.24153300  |
| H | 0.61950300  | -1.61653900 | 2.41939400  |
| H | -0.78416700 | -0.96949700 | 3.22376100  |
| H | -1.00686100 | -1.90838600 | 1.72972800  |

### M5<sub>Me</sub>'-Ac

|                                              |             |             |                             |
|----------------------------------------------|-------------|-------------|-----------------------------|
| Zero-point correction=                       |             |             | 0.417273 (Hartree/Particle) |
| Thermal correction to Energy=                |             |             | 0.446036                    |
| Thermal correction to Enthalpy=              |             |             | 0.446980                    |
| Thermal correction to Gibbs Free Energy=     |             |             | 0.351233                    |
| Sum of electronic and zero-point Energies=   |             |             | -1437.113467                |
| Sum of electronic and thermal Energies=      |             |             | -1437.084704                |
| Sum of electronic and thermal Enthalpies=    |             |             | -1437.083760                |
| Sum of electronic and thermal Free Energies= |             |             | -1437.179507                |
| Pd                                           | 1.66555700  | 0.35347600  | -0.15378700                 |
| C                                            | -3.51218100 | 0.08666200  | 1.28926600                  |
| C                                            | -2.67862100 | -0.06140000 | 2.33402700                  |
| P                                            | 2.68749000  | -1.70666200 | 0.15922600                  |
| P                                            | 0.74934300  | 2.46690200  | -0.48443000                 |
| C                                            | 4.52123900  | -1.75877600 | -0.09675800                 |
| H                                            | 4.75178400  | -1.43887700 | -1.11454000                 |
| H                                            | 5.00180500  | -1.05981800 | 0.59016400                  |
| H                                            | 4.92729400  | -2.76213600 | 0.06663400                  |
| C                                            | 2.14832700  | -3.11302000 | -0.91926600                 |



|   |             |             |             |
|---|-------------|-------------|-------------|
| H | 2.31157900  | -2.84767900 | -1.96553200 |
| H | 2.69652500  | -4.03295900 | -0.69281000 |
| H | 1.07993800  | -3.28855800 | -0.78089900 |
| C | 2.54814400  | -2.47881700 | 1.83659100  |
| H | 1.49452500  | -2.63004300 | 2.07795600  |
| H | 3.07099400  | -3.43890800 | 1.89035300  |
| H | 2.96779900  | -1.79969500 | 2.58111700  |
| C | 1.95021700  | 3.87327200  | -0.59201600 |
| H | 2.53315900  | 3.92218700  | 0.32951400  |
| H | 2.64235700  | 3.69554100  | -1.41708000 |
| H | 1.44190100  | 4.83007000  | -0.74785500 |
| C | -0.42054400 | 3.10576100  | 0.80054300  |
| H | 0.09084000  | 3.14415700  | 1.76441400  |
| H | -0.79033800 | 4.10523500  | 0.55082100  |
| H | -1.26672500 | 2.42262800  | 0.89442100  |
| C | -0.24037800 | 2.72967000  | -2.02624400 |
| H | -0.61433700 | 3.75579700  | -2.09795600 |
| H | 0.38299800  | 2.51345900  | -2.89591800 |
| H | -1.08444800 | 2.03775000  | -2.03714300 |
| C | -2.91699400 | 0.70494700  | 3.61082700  |
| H | -3.77915500 | 1.37043700  | 3.53583300  |
| H | -3.08094700 | 0.02113800  | 4.45221100  |
| H | -2.04002400 | 1.31054200  | 3.86959700  |
| H | -4.37474000 | 0.73392800  | 1.43929400  |
| C | -3.46037700 | -0.54499900 | -0.04239400 |
| C | -2.26441500 | -0.79581600 | -0.73706900 |
| C | -4.66942000 | -0.87312700 | -0.68035900 |
| C | -2.28325600 | -1.37750600 | -2.00300700 |
| H | -1.31011000 | -0.50652600 | -0.31019400 |
| C | -4.68677900 | -1.45993400 | -1.94069800 |
| H | -5.60565900 | -0.67004400 | -0.17004200 |
| C | -3.49055300 | -1.71925200 | -2.60834200 |
| H | -1.34518400 | -1.54855700 | -2.51992500 |
| H | -5.63442800 | -1.71102800 | -2.40480600 |
| H | -3.50092900 | -2.17043900 | -3.59427300 |
| C | -1.48392600 | -0.98017700 | 2.36199000  |
| H | -0.55460700 | -0.43581400 | 2.15120100  |
| H | -1.37774800 | -1.42676900 | 3.35606300  |
| H | -1.56511300 | -1.78341300 | 1.62904800  |

**Com6<sub>ph-d</sub>**

|                                 |                             |
|---------------------------------|-----------------------------|
| Zero-point correction=          | 0.424114 (Hartree/Particle) |
| Thermal correction to Energy=   | 0.455317                    |
| Thermal correction to Enthalpy= | 0.456261                    |

|                                              |             |             |              |
|----------------------------------------------|-------------|-------------|--------------|
| Thermal correction to Gibbs Free Energy=     |             |             | 0.357908     |
| Sum of electronic and zero-point Energies=   |             |             | -1587.614001 |
| Sum of electronic and thermal Energies=      |             |             | -1587.582798 |
| Sum of electronic and thermal Enthalpies=    |             |             | -1587.581854 |
| Sum of electronic and thermal Free Energies= |             |             | -1587.680207 |
| Pd                                           | -0.38289000 | -0.27822200 | -0.04859600  |
| C                                            | 0.52591300  | -1.62974400 | -1.55921200  |
| C                                            | 1.38201800  | -0.52311200 | -1.39469500  |
| P                                            | -2.37303000 | -1.38237000 | 0.66723900   |
| P                                            | -0.00295200 | 1.84441100  | 1.05664700   |
| C                                            | -2.08934200 | -2.77985400 | 1.85082200   |
| H                                            | -1.41626600 | -3.50885500 | 1.39611500   |
| H                                            | -1.61129100 | -2.39822500 | 2.75522900   |
| H                                            | -3.02443500 | -3.27774300 | 2.12468200   |
| C                                            | -3.37546700 | -2.22175700 | -0.64488000  |
| H                                            | -2.75034800 | -2.95271000 | -1.16119400  |
| H                                            | -4.25337600 | -2.72758300 | -0.23160600  |
| H                                            | -3.69717500 | -1.48109600 | -1.37937600  |
| C                                            | -3.70244200 | -0.44602400 | 1.55857300   |
| H                                            | -4.04961800 | 0.37766300  | 0.93176500   |
| H                                            | -4.55391100 | -1.08476700 | 1.81276500   |
| H                                            | -3.29176900 | -0.01994100 | 2.47609000   |
| C                                            | 1.02184100  | 1.69171900  | 2.59264900   |
| H                                            | 0.49861100  | 1.06985600  | 3.32228000   |
| H                                            | 1.96657000  | 1.20382800  | 2.34581500   |
| H                                            | 1.22807000  | 2.66858300  | 3.04042100   |
| C                                            | -1.41463300 | 2.87817600  | 1.66171400   |
| H                                            | -2.02626200 | 2.29958600  | 2.35685300   |
| H                                            | -1.06408500 | 3.78430100  | 2.16532400   |
| H                                            | -2.02810700 | 3.16012000  | 0.80478600   |
| C                                            | 0.95743000  | 3.10310100  | 0.10295300   |
| H                                            | 1.16708200  | 3.99382000  | 0.70318600   |
| H                                            | 1.89976200  | 2.66247000  | -0.22765100  |
| H                                            | 0.37413900  | 3.38955800  | -0.77338600  |
| C                                            | -2.48779800 | 2.12564600  | -2.49309100  |
| O                                            | -2.27893300 | 0.81401000  | -2.39375900  |
| O                                            | -2.03584700 | 2.98134000  | -1.77688100  |
| H                                            | -3.15315100 | 2.33033200  | -3.34604900  |
| H                                            | -0.14965700 | -1.55544200 | -2.40887100  |
| H                                            | 1.27980100  | 0.26355700  | -2.13830900  |
| H                                            | -1.66989900 | 0.60872600  | -1.62962700  |
| C                                            | 2.69655000  | -0.49844700 | -0.70812300  |
| C                                            | 3.76443900  | 0.18226900  | -1.31773500  |
| C                                            | 2.94746600  | -1.10590500 | 0.53545300   |

|   |             |             |             |
|---|-------------|-------------|-------------|
| C | 5.02483800  | 0.23881600  | -0.72853800 |
| H | 3.59993800  | 0.66672500  | -2.27498200 |
| C | 4.20773500  | -1.05618500 | 1.12280400  |
| H | 2.13482000  | -1.59294100 | 1.06100000  |
| C | 5.25700900  | -0.38593800 | 0.49425300  |
| H | 5.82723400  | 0.77095500  | -1.22835300 |
| H | 4.36881000  | -1.53424000 | 2.08337300  |
| H | 6.23722900  | -0.34518300 | 0.95549300  |
| C | 0.82299900  | -3.06063900 | -1.16519600 |
| H | 1.38063000  | -3.56492000 | -1.96608100 |
| H | 1.41704600  | -3.14792200 | -0.25703300 |
| H | -0.10081800 | -3.62647200 | -1.01694100 |

#### TS4<sub>Ph-c</sub>

|                                              |             |             |                             |
|----------------------------------------------|-------------|-------------|-----------------------------|
| Zero-point correction=                       |             |             | 0.419572 (Hartree/Particle) |
| Thermal correction to Energy=                |             |             | 0.449680                    |
| Thermal correction to Enthalpy=              |             |             | 0.450625                    |
| Thermal correction to Gibbs Free Energy=     |             |             | 0.356736                    |
| Sum of electronic and zero-point Energies=   |             |             | -1587.572985                |
| Sum of electronic and thermal Energies=      |             |             | -1587.542877                |
| Sum of electronic and thermal Enthalpies=    |             |             | -1587.541932                |
| Sum of electronic and thermal Free Energies= |             |             | -1587.635821                |
| Pd                                           | -0.39360700 | -0.08995600 | -0.17360300                 |
| C                                            | 0.35111300  | -2.22895700 | -0.54271100                 |
| C                                            | 1.29560700  | -1.15570700 | -0.87334400                 |
| P                                            | -2.42280200 | 0.27207000  | 1.16008500                  |
| P                                            | 0.38120200  | 2.09466700  | -0.56672800                 |
| C                                            | -2.30361200 | 1.39496200  | 2.62998400                  |
| H                                            | -1.54480300 | 1.01552700  | 3.31755900                  |
| H                                            | -2.00428100 | 2.39685900  | 2.31517700                  |
| H                                            | -3.25737600 | 1.46525000  | 3.16081400                  |
| C                                            | -3.13217600 | -1.24905200 | 1.92576300                  |
| H                                            | -2.40792800 | -1.66850300 | 2.62773600                  |
| H                                            | -4.06330800 | -1.03334000 | 2.45780100                  |
| H                                            | -3.30318000 | -1.98209200 | 1.13681300                  |
| C                                            | -3.86060100 | 0.98148600  | 0.24810700                  |
| H                                            | -3.97671600 | 0.43740700  | -0.68946300                 |
| H                                            | -4.77997800 | 0.93016100  | 0.83803400                  |
| H                                            | -3.65341100 | 2.02491300  | 0.00221700                  |
| C                                            | 1.41240900  | 2.86173900  | 0.75647200                  |
| H                                            | 0.82856600  | 2.93842800  | 1.67574300                  |
| H                                            | 2.27328800  | 2.22101100  | 0.95441400                  |
| H                                            | 1.76054100  | 3.85765800  | 0.46817800                  |
| C                                            | -0.90460300 | 3.38465200  | -0.87241400                 |

|   |             |             |             |
|---|-------------|-------------|-------------|
| H | -1.52159100 | 3.51402300  | 0.01837800  |
| H | -0.45053000 | 4.34572900  | -1.12976700 |
| H | -1.54936100 | 3.05936400  | -1.69069400 |
| C | 1.44871400  | 2.28793200  | -2.05809900 |
| H | 1.74915900  | 3.32972400  | -2.20156800 |
| H | 2.34134200  | 1.67092200  | -1.94604300 |
| H | 0.89944600  | 1.94677600  | -2.93743100 |
| C | -2.80210700 | -1.87016300 | -1.89424000 |
| O | -2.29935800 | -2.52736400 | -0.91657100 |
| O | -2.48396300 | -0.74241200 | -2.28419400 |
| H | -3.62273100 | -2.40752300 | -2.42155600 |
| H | 0.09855900  | -2.77257500 | -1.45497100 |
| H | 1.39277100  | -0.98994800 | -1.94448500 |
| H | -1.00493300 | -1.94513800 | -0.54096200 |
| C | 2.56434500  | -0.87719400 | -0.15661000 |
| C | 3.73611900  | -0.68674700 | -0.91038500 |
| C | 2.67579200  | -0.78497700 | 1.24316300  |
| C | 4.96123300  | -0.42650300 | -0.30152600 |
| H | 3.68264200  | -0.75998500 | -1.99202800 |
| C | 3.89914900  | -0.52736500 | 1.85259000  |
| H | 1.78912300  | -0.88906600 | 1.85485300  |
| C | 5.05070600  | -0.34756200 | 1.08579900  |
| H | 5.84667100  | -0.29031600 | -0.91295700 |
| H | 3.95373100  | -0.46211200 | 2.93402600  |
| H | 6.00258100  | -0.14770800 | 1.56442200  |
| C | 0.55850500  | -3.19630400 | 0.61773500  |
| H | 1.46597200  | -3.79246800 | 0.47273600  |
| H | 0.63980100  | -2.69895800 | 1.58359000  |
| H | -0.29113500 | -3.88031700 | 0.66921600  |

### M6<sub>ph-g</sub>

|                                              |             |             |                             |
|----------------------------------------------|-------------|-------------|-----------------------------|
| Zero-point correction=                       |             |             | 0.427057 (Hartree/Particle) |
| Thermal correction to Energy=                |             |             | 0.456817                    |
| Thermal correction to Enthalpy=              |             |             | 0.457762                    |
| Thermal correction to Gibbs Free Energy=     |             |             | 0.365986                    |
| Sum of electronic and zero-point Energies=   |             |             | -1587.602581                |
| Sum of electronic and thermal Energies=      |             |             | -1587.572821                |
| Sum of electronic and thermal Enthalpies=    |             |             | -1587.571877                |
| Sum of electronic and thermal Free Energies= |             |             | -1587.663652                |
| Pd                                           | -0.36309000 | -0.08256500 | 0.26827200                  |
| C                                            | 1.63477900  | 0.01376700  | 1.03508500                  |
| C                                            | 2.44292900  | -0.11321600 | -0.21423300                 |
| C                                            | 3.13057200  | 0.99792200  | -0.73723500                 |
| C                                            | 2.55142200  | -1.32989200 | -0.91577800                 |

|   |             |             |             |
|---|-------------|-------------|-------------|
| C | 3.88699600  | 0.90734300  | -1.90195800 |
| H | 3.08990500  | 1.94350300  | -0.20436600 |
| C | 3.30833900  | -1.41979800 | -2.07944200 |
| H | 2.00375400  | -2.19140500 | -0.55582700 |
| C | 3.98024100  | -0.30542300 | -2.58201900 |
| H | 4.41434400  | 1.78060500  | -2.27187400 |
| H | 3.37285800  | -2.36938300 | -2.60046700 |
| H | 4.57215000  | -0.38251800 | -3.48726100 |
| C | 1.87354900  | -1.03088000 | 2.12711000  |
| P | -0.59529500 | 2.20424500  | 0.47320900  |
| P | -2.48320300 | -0.54275900 | -0.96526500 |
| C | 0.49423400  | 3.17795900  | 1.60181800  |
| H | 0.47394300  | 2.74377400  | 2.60265500  |
| H | 1.52375900  | 3.17050200  | 1.24447100  |
| H | 0.14760300  | 4.21338500  | 1.65272900  |
| C | -2.25461100 | 2.69512200  | 1.11553200  |
| H | -2.39468000 | 2.25890100  | 2.10608000  |
| H | -2.34392000 | 3.78263400  | 1.18400600  |
| H | -3.04183400 | 2.31464900  | 0.46544300  |
| C | -0.44395500 | 3.15860900  | -1.09738900 |
| H | -1.18235600 | 2.80547700  | -1.81761100 |
| H | -0.58798800 | 4.22953700  | -0.93004300 |
| H | 0.54811000  | 2.98767300  | -1.51933200 |
| C | -3.26170000 | 0.65483300  | -2.15013600 |
| H | -3.59797000 | 1.55538600  | -1.63285600 |
| H | -2.53365200 | 0.94524200  | -2.91057100 |
| H | -4.12405000 | 0.20346500  | -2.64874500 |
| C | -3.91920200 | -1.04524200 | 0.07382100  |
| H | -4.27093000 | -0.18341400 | 0.64528800  |
| H | -4.74115100 | -1.43120700 | -0.53586800 |
| H | -3.57707100 | -1.79631000 | 0.78644700  |
| C | -2.22139900 | -1.98792200 | -2.07855400 |
| H | -3.16249300 | -2.32675800 | -2.52019100 |
| H | -1.53125600 | -1.70087900 | -2.87466200 |
| H | -1.75528800 | -2.79085000 | -1.51042000 |
| C | -0.85607100 | -2.83761600 | 1.23487300  |
| O | -1.66831300 | -2.33837300 | 2.00750900  |
| O | -0.17229400 | -2.24737100 | 0.31659300  |
| H | -0.65342800 | -3.92973300 | 1.27836300  |
| H | 1.80053100  | 0.99885600  | 1.46820100  |
| H | 1.07960500  | -0.95799200 | 2.87594000  |
| H | 1.80602000  | -2.03501100 | 1.71065700  |
| C | 3.23830700  | -0.84752000 | 2.81364100  |
| H | 3.32126900  | 0.13936800  | 3.28158600  |

|   |            |             |            |
|---|------------|-------------|------------|
| H | 3.38259900 | -1.59826100 | 3.59658400 |
| H | 4.05950200 | -0.94584600 | 2.09834400 |

### M6<sub>ph-e</sub>

Zero-point correction= 0.427271 (Hartree/Particle)

Thermal correction to Energy= 0.457028

Thermal correction to Enthalpy= 0.457972

Thermal correction to Gibbs Free Energy= 0.366715

Sum of electronic and zero-point Energies= -1587.608752

Sum of electronic and thermal Energies= -1587.578995

Sum of electronic and thermal Enthalpies= -1587.578050

Sum of electronic and thermal Free Energies= -1587.669308

|    |             |             |             |
|----|-------------|-------------|-------------|
| Pd | -0.61853600 | 0.22068800  | 0.04382000  |
| C  | 1.16464300  | -0.35735100 | 1.03270100  |
| C  | 2.33550000  | -0.45649800 | 0.08563200  |
| C  | 3.55460300  | 0.17082500  | 0.39471100  |
| C  | 2.28333200  | -1.18855000 | -1.11088900 |
| C  | 4.66195000  | 0.07764000  | -0.44708700 |
| H  | 3.63888900  | 0.73283900  | 1.31903400  |
| C  | 3.38573600  | -1.28837000 | -1.95445700 |
| H  | 1.35424500  | -1.66469700 | -1.39205500 |
| C  | 4.58331900  | -0.65319500 | -1.62938000 |
| H  | 5.58742500  | 0.57408400  | -0.17477100 |
| H  | 3.30673100  | -1.85742200 | -2.87482700 |
| H  | 5.44083000  | -0.72636900 | -2.28872800 |
| C  | 0.99328000  | -1.58302900 | 1.94741300  |
| P  | -0.00887900 | 2.51210000  | 0.10000600  |
| P  | -1.59555900 | -1.98130500 | -0.28404000 |
| C  | -0.05348500 | 3.18892000  | -1.60739800 |
| H  | 0.75141800  | 2.74318700  | -2.19449700 |
| H  | -1.01020000 | 2.90544500  | -2.04607800 |
| H  | 0.05678100  | 4.27670900  | -1.60696400 |
| C  | 1.59290300  | 3.14064900  | 0.75705600  |
| H  | 2.42316900  | 2.66997300  | 0.23061100  |
| H  | 1.65180500  | 4.22449300  | 0.62737500  |
| H  | 1.68124000  | 2.90936700  | 1.82025300  |
| C  | -1.22750200 | 3.54705900  | 1.01182300  |
| H  | -1.23211200 | 3.26651000  | 2.06648100  |
| H  | -0.98076900 | 4.60853800  | 0.92183400  |
| H  | -2.21877200 | 3.36460100  | 0.60080300  |
| C  | -2.90716400 | -1.97268700 | -1.57960600 |
| H  | -3.76169600 | -1.41618400 | -1.20062400 |
| H  | -2.53915700 | -1.48517900 | -2.48279800 |
| H  | -3.20916300 | -2.99710800 | -1.81301300 |

|   |             |             |             |
|---|-------------|-------------|-------------|
| C | -2.49339300 | -2.63252600 | 1.18452200  |
| H | -3.19341800 | -1.85859500 | 1.49964100  |
| H | -3.03553600 | -3.54848700 | 0.93359700  |
| H | -1.79348900 | -2.84155900 | 1.99421900  |
| C | -0.61354200 | -3.44929900 | -0.84889700 |
| H | -1.25928400 | -4.33096700 | -0.88462900 |
| H | -0.22558900 | -3.26527700 | -1.85270800 |
| H | 0.22741900  | -3.65561400 | -0.18860400 |
| C | -3.52590800 | 1.04053600  | -0.39567400 |
| O | -3.86490800 | 0.29056300  | 0.51641000  |
| O | -2.36148700 | 1.17199200  | -0.92293400 |
| H | -4.28750400 | 1.69965100  | -0.86875800 |
| H | 1.35331500  | 0.48702600  | 1.70245600  |
| H | 0.06534600  | -1.46728500 | 2.51556400  |
| H | 0.88986000  | -2.49220900 | 1.35082000  |
| C | 2.15138200  | -1.78024400 | 2.94061800  |
| H | 2.26831500  | -0.90429600 | 3.58675100  |
| H | 1.96576000  | -2.64474300 | 3.58535500  |
| H | 3.10060400  | -1.94373600 | 2.42473600  |

#### TS5<sub>Ph-a</sub>

|                                              |             |             |                             |
|----------------------------------------------|-------------|-------------|-----------------------------|
| Zero-point correction=                       |             |             | 0.426900 (Hartree/Particle) |
| Thermal correction to Energy=                |             |             | 0.455793                    |
| Thermal correction to Enthalpy=              |             |             | 0.456737                    |
| Thermal correction to Gibbs Free Energy=     |             |             | 0.367623                    |
| Sum of electronic and zero-point Energies=   |             |             | -1587.606864                |
| Sum of electronic and thermal Energies=      |             |             | -1587.577970                |
| Sum of electronic and thermal Enthalpies=    |             |             | -1587.577026                |
| Sum of electronic and thermal Free Energies= |             |             | -1587.666140                |
| Pd                                           | -0.66155900 | -0.03525700 | 0.00653200                  |
| C                                            | 1.08959000  | 0.70570400  | 0.95671600                  |
| C                                            | 2.31996700  | 0.64588600  | 0.07082500                  |
| C                                            | 3.62398400  | 0.54843500  | 0.58206800                  |
| C                                            | 2.19883500  | 0.78964900  | -1.32299400                 |
| C                                            | 4.74183300  | 0.57693300  | -0.25096100                 |
| H                                            | 3.78442100  | 0.46308300  | 1.64986000                  |
| C                                            | 3.31085000  | 0.82368100  | -2.15889500                 |
| H                                            | 1.20440300  | 0.84971000  | -1.75285800                 |
| C                                            | 4.59492900  | 0.71217500  | -1.62786100                 |
| H                                            | 5.73257100  | 0.49684400  | 0.18410500                  |
| H                                            | 3.17252400  | 0.92918300  | -3.22985500                 |
| H                                            | 5.46370800  | 0.73048900  | -2.27615200                 |
| C                                            | 1.20802300  | 0.15388000  | 2.39752200                  |
| P                                            | -1.63785900 | 2.12519600  | -0.20581900                 |

|   |             |             |             |
|---|-------------|-------------|-------------|
| P | 0.13140000  | -2.30752200 | 0.02366300  |
| C | -2.06838300 | 2.46077700  | -1.96117600 |
| H | -1.15471900 | 2.57643400  | -2.54724300 |
| H | -2.61843400 | 1.59546700  | -2.33059500 |
| H | -2.67466600 | 3.36565700  | -2.05668700 |
| C | -0.77723800 | 3.67162900  | 0.31368700  |
| H | 0.18001500  | 3.75825200  | -0.20404100 |
| H | -1.38787800 | 4.54693400  | 0.07758700  |
| H | -0.58568700 | 3.65656700  | 1.38808900  |
| C | -3.25667900 | 2.24569600  | 0.65952700  |
| H | -3.10652300 | 2.16540500  | 1.73749900  |
| H | -3.75738100 | 3.19087500  | 0.43308200  |
| H | -3.87411400 | 1.41058100  | 0.33097000  |
| C | -0.41770700 | -3.27666200 | -1.44205000 |
| H | -1.50160300 | -3.36774000 | -1.40216600 |
| H | -0.13017100 | -2.76013100 | -2.35908400 |
| H | 0.03664800  | -4.27125300 | -1.43124800 |
| C | -0.45390400 | -3.32359900 | 1.44185600  |
| H | -1.54250900 | -3.29587000 | 1.43558900  |
| H | -0.09865600 | -4.35367000 | 1.34725400  |
| H | -0.08248400 | -2.90641000 | 2.37955700  |
| C | 1.94694200  | -2.63571800 | 0.03008000  |
| H | 2.12726600  | -3.71378500 | 0.00305500  |
| H | 2.41968100  | -2.16788000 | -0.83387200 |
| H | 2.40498100  | -2.22084400 | 0.92746700  |
| C | -3.33581100 | -1.45946500 | -0.72496500 |
| O | -3.12473800 | -2.38995000 | 0.04763900  |
| O | -2.56483900 | -0.47445900 | -1.01636100 |
| H | -4.30012200 | -1.42397700 | -1.27887400 |
| H | 0.85897100  | 1.76850300  | 1.04486000  |
| H | 0.58750000  | -0.73658400 | 2.52075300  |
| H | 2.22913700  | -0.17776500 | 2.61093900  |
| C | 0.79281800  | 1.17145300  | 3.46745600  |
| H | -0.24234900 | 1.49483700  | 3.31942400  |
| H | 0.86243300  | 0.74538700  | 4.47262800  |
| H | 1.42997600  | 2.06094700  | 3.43659000  |

### M6<sub>ph</sub>'-a

|                                            |                             |
|--------------------------------------------|-----------------------------|
| Zero-point correction=                     | 0.426912 (Hartree/Particle) |
| Thermal correction to Energy=              | 0.456569                    |
| Thermal correction to Enthalpy=            | 0.457514                    |
| Thermal correction to Gibbs Free Energy=   | 0.366778                    |
| Sum of electronic and zero-point Energies= | -1587.613093                |
| Sum of electronic and thermal Energies=    | -1587.583435                |



|    |                                              |             |              |
|----|----------------------------------------------|-------------|--------------|
|    | Sum of electronic and thermal Enthalpies=    |             | -1587.582491 |
|    | Sum of electronic and thermal Free Energies= |             | -1587.673227 |
| Pd | 0.60885900                                   | 0.03830300  | -0.03626700  |
| C  | -1.04160200                                  | -0.71964200 | 1.08000700   |
| C  | -2.30714400                                  | -0.80200100 | 0.26537800   |
| C  | -3.55522700                                  | -0.37898400 | 0.74928400   |
| C  | -2.28586200                                  | -1.37611300 | -1.01967600  |
| C  | -4.71726700                                  | -0.51331600 | -0.01142300  |
| H  | -3.63230100                                  | 0.05642100  | 1.73794800   |
| C  | -3.44105500                                  | -1.51607700 | -1.77909100  |
| H  | -1.33465200                                  | -1.69388600 | -1.43311300  |
| C  | -4.66971400                                  | -1.08082700 | -1.27994400  |
| H  | -5.66373400                                  | -0.17376200 | 0.39621400   |
| H  | -3.38330900                                  | -1.96005100 | -2.76737900  |
| H  | -5.57195100                                  | -1.18418200 | -1.87206600  |
| C  | -1.16279300                                  | -0.04907800 | 2.44951900   |
| P  | 1.71001700                                   | -2.07686600 | -0.10068000  |
| P  | -0.27016700                                  | 2.26190500  | -0.20840900  |
| C  | 2.12686400                                   | -2.52361000 | -1.83483200  |
| H  | 1.21181000                                   | -2.74016600 | -2.38947100  |
| H  | 2.61404300                                   | -1.65831600 | -2.28391200  |
| H  | 2.78605500                                   | -3.39492000 | -1.87398900  |
| C  | 0.94762100                                   | -3.62496400 | 0.55398400   |
| H  | -0.01956000                                  | -3.79777700 | 0.07819100   |
| H  | 1.59684300                                   | -4.48259300 | 0.35986300   |
| H  | 0.78861500                                   | -3.54298900 | 1.63077800   |
| C  | 3.34789600                                   | -2.05417400 | 0.73793400   |
| H  | 3.21205800                                   | -1.89560400 | 1.80914700   |
| H  | 3.88746100                                   | -2.99172700 | 0.57797800   |
| H  | 3.92706300                                   | -1.22421000 | 0.33501200   |
| C  | 0.34523700                                   | 3.13714100  | -1.70723700  |
| H  | 1.41509900                                   | 3.29925500  | -1.59434900  |
| H  | 0.16495000                                   | 2.52902500  | -2.59455100  |
| H  | -0.16383500                                  | 4.09861500  | -1.81656200  |
| C  | 0.19967200                                   | 3.39733200  | 1.15988000   |
| H  | 1.28782600                                   | 3.40329700  | 1.21427900   |
| H  | -0.17628500                                  | 4.40706300  | 0.97294300   |
| H  | -0.20815100                                  | 3.03364900  | 2.10438500   |
| C  | -2.08817100                                  | 2.52328700  | -0.36092300  |
| H  | -2.29751900                                  | 3.58092900  | -0.54342600  |
| H  | -2.48028400                                  | 1.92794300  | -1.18646400  |
| H  | -2.60231300                                  | 2.21001100  | 0.54649000   |
| C  | 3.20791600                                   | 1.48462600  | -0.84011200  |
| O  | 2.99379900                                   | 2.36855200  | -0.01441500  |

|   |             |             |             |
|---|-------------|-------------|-------------|
| O | 2.44549300  | 0.50576400  | -1.17283700 |
| H | 4.16381100  | 1.49424500  | -1.40936900 |
| H | -0.72207000 | -1.74837600 | 1.25772500  |
| H | -1.48280800 | 0.99357100  | 2.34522800  |
| H | -1.95942100 | -0.54625500 | 3.02321900  |
| C | 0.12198000  | -0.09979900 | 3.28336100  |
| H | 0.94228200  | 0.42468900  | 2.78620700  |
| H | -0.02947900 | 0.35575600  | 4.26634500  |
| H | 0.44003000  | -1.13453200 | 3.44866500  |

### M6<sub>ph</sub>-b

|                                              |             |             |                             |
|----------------------------------------------|-------------|-------------|-----------------------------|
| Zero-point correction=                       |             |             | 0.426815 (Hartree/Particle) |
| Thermal correction to Energy=                |             |             | 0.456746                    |
| Thermal correction to Enthalpy=              |             |             | 0.457691                    |
| Thermal correction to Gibbs Free Energy=     |             |             | 0.365424                    |
| Sum of electronic and zero-point Energies=   |             |             | -1587.606891                |
| Sum of electronic and thermal Energies=      |             |             | -1587.576959                |
| Sum of electronic and thermal Enthalpies=    |             |             | -1587.576015                |
| Sum of electronic and thermal Free Energies= |             |             | -1587.668282                |
| Pd                                           | 0.36215500  | 0.08326400  | 0.26196900                  |
| C                                            | -1.63343500 | 0.00173500  | 1.03445800                  |
| C                                            | -2.44808900 | 0.11398500  | -0.21196100                 |
| C                                            | -3.14326400 | -1.00111400 | -0.71605600                 |
| C                                            | -2.55706000 | 1.32212400  | -0.92802800                 |
| C                                            | -3.90780500 | -0.92238400 | -1.87628200                 |
| H                                            | -3.10328100 | -1.93987900 | -0.17142300                 |
| C                                            | -3.32265800 | 1.40044200  | -2.08670400                 |
| H                                            | -2.00257100 | 2.18546500  | -0.58307200                 |
| C                                            | -4.00235800 | 0.28233200  | -2.57024700                 |
| H                                            | -4.44091300 | -1.79831600 | -2.23133700                 |
| H                                            | -3.38805400 | 2.34374200  | -2.61889800                 |
| H                                            | -4.60116100 | 0.35048200  | -3.47166800                 |
| C                                            | -1.86477000 | 1.06225700  | 2.11322100                  |
| P                                            | 0.58676500  | -2.20128900 | 0.48640900                  |
| P                                            | 2.49530700  | 0.52464500  | -0.96397400                 |
| C                                            | -0.51272700 | -3.17004200 | 1.60950400                  |
| H                                            | -0.50362200 | -2.73170500 | 2.60872100                  |
| H                                            | -1.53833700 | -3.16544100 | 1.24106400                  |
| H                                            | -0.16506500 | -4.20467600 | 1.66850300                  |
| C                                            | 2.24045900  | -2.68463800 | 1.14898300                  |
| H                                            | 2.36397100  | -2.25148200 | 2.14312700                  |
| H                                            | 2.33742700  | -3.77169400 | 1.21443000                  |
| H                                            | 3.03273800  | -2.29427400 | 0.51116400                  |
| C                                            | 0.45047100  | -3.16650700 | -1.07887200                 |

|   |             |             |             |
|---|-------------|-------------|-------------|
| H | 1.19613500  | -2.82052900 | -1.79489200 |
| H | 0.59103800  | -4.23618600 | -0.90137200 |
| H | -0.53761800 | -2.99768300 | -1.51092200 |
| C | 3.91236200  | 1.04934500  | 0.09025300  |
| H | 3.55533400  | 1.80840800  | 0.78691600  |
| H | 4.25708200  | 0.19728500  | 0.68041400  |
| H | 4.74300200  | 1.42900900  | -0.51164800 |
| C | 2.24311700  | 1.94831900  | -2.10678600 |
| H | 1.75142000  | 2.75307700  | -1.56311500 |
| H | 3.19064600  | 2.29298900  | -2.52962200 |
| H | 1.57836500  | 1.63914700  | -2.91618200 |
| C | 3.29649100  | -0.69116400 | -2.11425700 |
| H | 4.16396500  | -0.24556700 | -2.60918700 |
| H | 3.62913500  | -1.57967200 | -1.57423100 |
| H | 2.58074000  | -0.99974400 | -2.87928200 |
| C | 0.86020500  | 2.85985900  | 1.19037700  |
| O | 1.67041400  | 2.37786000  | 1.97584000  |
| O | 0.18275500  | 2.25122000  | 0.27934800  |
| H | 0.65387900  | 3.95194900  | 1.21284500  |
| H | -1.80000300 | -0.97667400 | 1.48257200  |
| H | -1.06536300 | 1.00091100  | 2.85728100  |
| H | -1.80080100 | 2.06022300  | 1.68134400  |
| C | -3.22392700 | 0.88795700  | 2.81306300  |
| H | -3.30172200 | -0.09178800 | 3.29671100  |
| H | -3.36281300 | 1.65017700  | 3.58584800  |
| H | -4.05119800 | 0.97430000  | 2.10328200  |

### TS6<sub>Ph-b</sub>

|                                              |             |             |                             |
|----------------------------------------------|-------------|-------------|-----------------------------|
| Zero-point correction=                       |             |             | 0.420043 (Hartree/Particle) |
| Thermal correction to Energy=                |             |             | 0.449896                    |
| Thermal correction to Enthalpy=              |             |             | 0.450840                    |
| Thermal correction to Gibbs Free Energy=     |             |             | 0.358675                    |
| Sum of electronic and zero-point Energies=   |             |             | -1587.579924                |
| Sum of electronic and thermal Energies=      |             |             | -1587.550071                |
| Sum of electronic and thermal Enthalpies=    |             |             | -1587.549127                |
| Sum of electronic and thermal Free Energies= |             |             | -1587.641292                |
| Pd                                           | 0.49381300  | 0.20418600  | 0.34950400                  |
| C                                            | -1.26367800 | -0.55892800 | 1.29929800                  |
| P                                            | -0.30688200 | 2.36901300  | -0.16002600                 |
| P                                            | 2.87806500  | 0.17997100  | -0.26188100                 |
| C                                            | 0.85226000  | 3.68716700  | -0.73996500                 |
| H                                            | 1.60292100  | 3.88897800  | 0.02546200                  |
| H                                            | 1.36288100  | 3.35568300  | -1.64573800                 |
| H                                            | 0.31110500  | 4.61163400  | -0.96003500                 |

|   |             |             |             |
|---|-------------|-------------|-------------|
| C | -1.19764400 | 3.25850100  | 1.19051200  |
| H | -0.52232400 | 3.41275800  | 2.03424800  |
| H | -1.57154100 | 4.22768700  | 0.84882000  |
| H | -2.03905300 | 2.65350800  | 1.52823700  |
| C | -1.54779300 | 2.35107600  | -1.52267100 |
| H | -2.37030600 | 1.68623200  | -1.25798300 |
| H | -1.93729200 | 3.35451300  | -1.71627800 |
| H | -1.07923000 | 1.96618900  | -2.43024900 |
| C | 3.87411300  | 1.73849200  | -0.13785000 |
| H | 3.51528400  | 2.47865400  | -0.85382700 |
| H | 3.78026600  | 2.15780800  | 0.86622500  |
| H | 4.93118000  | 1.54204900  | -0.33829200 |
| C | 3.26784100  | -0.38255100 | -1.97324300 |
| H | 2.80383300  | 0.28573300  | -2.70148100 |
| H | 4.34703500  | -0.41192900 | -2.14878200 |
| H | 2.84748000  | -1.38070100 | -2.09080300 |
| C | 3.88831300  | -0.96503400 | 0.77226300  |
| H | 4.94140500  | -0.93479400 | 0.47722700  |
| H | 3.80383000  | -0.68358100 | 1.82398200  |
| H | 3.48645900  | -1.96871000 | 0.63519200  |
| C | 0.92896300  | -3.56074100 | -1.04186200 |
| O | -0.28403800 | -3.64957200 | -1.21845600 |
| O | 1.55749100  | -2.69980800 | -0.31954700 |
| H | 1.60270800  | -4.29151000 | -1.54554500 |
| H | -1.36163700 | 0.02508700  | 2.21443700  |
| C | -0.34042200 | -1.68455800 | 1.36413700  |
| H | -0.73227600 | -2.56792800 | 0.85535100  |
| H | 0.65832500  | -1.78556800 | 0.44117700  |
| C | -2.49799300 | -0.57812000 | 0.48447800  |
| C | -2.62968500 | -1.37245500 | -0.67038700 |
| C | -3.59438400 | 0.20947200  | 0.87512600  |
| C | -3.80910900 | -1.35044500 | -1.40676000 |
| H | -1.81685500 | -2.02232900 | -0.98185100 |
| C | -4.77409900 | 0.22638900  | 0.13507700  |
| H | -3.52659400 | 0.80001900  | 1.78403900  |
| C | -4.88438100 | -0.54993000 | -1.01611500 |
| H | -3.89101100 | -1.97313800 | -2.29094500 |
| H | -5.60815200 | 0.83720400  | 0.46369700  |
| H | -5.80132200 | -0.54338900 | -1.59477200 |
| C | 0.29730300  | -2.01051000 | 2.71173800  |
| H | 0.63331600  | -1.10796000 | 3.22917800  |
| H | -0.41851500 | -2.52443200 | 3.36239300  |
| H | 1.15969700  | -2.66701200 | 2.57968100  |

**M7<sub>ph</sub>-b**

|                                              |             |             |                             |
|----------------------------------------------|-------------|-------------|-----------------------------|
| Zero-point correction=                       |             |             | 0.424013 (Hartree/Particle) |
| Thermal correction to Energy=                |             |             | 0.455217                    |
| Thermal correction to Enthalpy=              |             |             | 0.456161                    |
| Thermal correction to Gibbs Free Energy=     |             |             | 0.358726                    |
| Sum of electronic and zero-point Energies=   |             |             | -1587.616793                |
| Sum of electronic and thermal Energies=      |             |             | -1587.585589                |
| Sum of electronic and thermal Enthalpies=    |             |             | -1587.584645                |
| Sum of electronic and thermal Free Energies= |             |             | -1587.682079                |
| Pd                                           | 0.54910000  | 0.21200000  | 0.54620000                  |
| C                                            | -1.23600000 | -0.42920000 | 1.77820000                  |
| P                                            | -0.05740000 | 2.34390000  | -0.39470000                 |
| P                                            | 2.75510000  | -0.53950000 | 0.02810000                  |
| C                                            | 1.17030000  | 3.32630000  | -1.37900000                 |
| H                                            | 2.05910000  | 3.51210000  | -0.77200000                 |
| H                                            | 1.47150000  | 2.75160000  | -2.25710000                 |
| H                                            | 0.75790000  | 4.28540000  | -1.70720000                 |
| C                                            | -0.56360000 | 3.60590000  | 0.86480000                  |
| H                                            | 0.25950000  | 3.77900000  | 1.56110000                  |
| H                                            | -0.84420000 | 4.55600000  | 0.39990000                  |
| H                                            | -1.41250000 | 3.22250000  | 1.43330000                  |
| C                                            | -1.51390000 | 2.36830000  | -1.53460000                 |
| H                                            | -2.37370000 | 1.92780000  | -1.02640000                 |
| H                                            | -1.76060000 | 3.38520000  | -1.85470000                 |
| H                                            | -1.29460000 | 1.75610000  | -2.41090000                 |
| C                                            | 4.03250000  | -0.02310000 | 1.26730000                  |
| H                                            | 4.08540000  | 1.06670000  | 1.30420000                  |
| H                                            | 3.74340000  | -0.37960000 | 2.25760000                  |
| H                                            | 5.02120000  | -0.42070000 | 1.01920000                  |
| C                                            | 3.57640000  | -0.01000000 | -1.54820000                 |
| H                                            | 3.64660000  | 1.07940000  | -1.57000000                 |
| H                                            | 4.57960000  | -0.43520000 | -1.64920000                 |
| H                                            | 2.96860000  | -0.32390000 | -2.39870000                 |
| C                                            | 3.02840000  | -2.36820000 | -0.03700000                 |
| H                                            | 4.06530000  | -2.61970000 | -0.28020000                 |
| H                                            | 2.77400000  | -2.80260000 | 0.93180000                  |
| H                                            | 2.35880000  | -2.80310000 | -0.78090000                 |
| C                                            | -0.04870000 | -1.92370000 | -2.86730000                 |
| O                                            | 0.12960000  | -2.83790000 | -2.10580000                 |
| O                                            | 0.02160000  | -0.62400000 | -2.57400000                 |
| H                                            | -0.29320000 | -2.04860000 | -3.93310000                 |
| H                                            | -1.35870000 | 0.32600000  | 2.55240000                  |
| C                                            | -0.19540000 | -1.34820000 | 1.95150000                  |
| H                                            | -0.23770000 | -2.28440000 | 1.40160000                  |

|   |             |             |             |
|---|-------------|-------------|-------------|
| H | 0.20200000  | -0.49220000 | -1.60420000 |
| C | -2.43670000 | -0.62410000 | 0.93970000  |
| C | -2.54900000 | -1.63890000 | -0.02840000 |
| C | -3.54790000 | 0.21620000  | 1.12790000  |
| C | -3.71430000 | -1.79540000 | -0.77000000 |
| H | -1.71440000 | -2.30460000 | -0.21350000 |
| C | -4.71430000 | 0.05950000  | 0.38400000  |
| H | -3.49500000 | 0.99760000  | 1.88030000  |
| C | -4.80580000 | -0.94830000 | -0.57320000 |
| H | -3.77130000 | -2.58880000 | -1.50790000 |
| H | -5.55540000 | 0.72220000  | 0.55850000  |
| H | -5.71300000 | -1.07640000 | -1.15280000 |
| C | 0.59970000  | -1.40500000 | 3.23810000  |
| H | 0.68430000  | -0.41930000 | 3.70310000  |
| H | 0.11430000  | -2.07160000 | 3.96390000  |
| H | 1.61120000  | -1.78910000 | 3.08060000  |

#### M6<sub>ph</sub>-al-a

|                                              |             |             |                             |
|----------------------------------------------|-------------|-------------|-----------------------------|
| Zero-point correction=                       |             |             | 0.426355 (Hartree/Particle) |
| Thermal correction to Energy=                |             |             | 0.456377                    |
| Thermal correction to Enthalpy=              |             |             | 0.457321                    |
| Thermal correction to Gibbs Free Energy=     |             |             | 0.364617                    |
| Sum of electronic and zero-point Energies=   |             |             | -1587.597423                |
| Sum of electronic and thermal Energies=      |             |             | -1587.567401                |
| Sum of electronic and thermal Enthalpies=    |             |             | -1587.566457                |
| Sum of electronic and thermal Free Energies= |             |             | -1587.659161                |
| Pd                                           | 0.35705500  | 0.09018300  | 0.24354800                  |
| C                                            | -1.49306300 | 0.90892700  | 0.96530800                  |
| P                                            | 1.15121400  | 2.16589500  | -0.37692200                 |
| P                                            | 2.35400000  | -1.32197000 | -0.39342700                 |
| C                                            | 2.73044900  | 2.65862000  | 0.44055400                  |
| H                                            | 2.56749700  | 2.73255900  | 1.51717000                  |
| H                                            | 3.49675600  | 1.90592200  | 0.26195200                  |
| H                                            | 3.08202900  | 3.62334900  | 0.06491700                  |
| C                                            | 0.15774200  | 3.70318600  | -0.13900000                 |
| H                                            | -0.06246100 | 3.84710500  | 0.91962900                  |
| H                                            | 0.71777200  | 4.56733300  | -0.50545900                 |
| H                                            | -0.78707000 | 3.63899600  | -0.67926700                 |
| C                                            | 1.55577000  | 2.27449200  | -2.17381000                 |
| H                                            | 0.64529200  | 2.11950000  | -2.75527700                 |
| H                                            | 1.98309000  | 3.24844000  | -2.42703600                 |
| H                                            | 2.26463500  | 1.49143000  | -2.44374800                 |
| C                                            | 4.04525400  | -0.67525600 | -0.80190700                 |
| H                                            | 4.00928400  | 0.00344100  | -1.65676000                 |

|   |             |             |             |
|---|-------------|-------------|-------------|
| H | 4.45504900  | -0.13483000 | 0.05384700  |
| H | 4.72314200  | -1.49852900 | -1.04324600 |
| C | 2.03514700  | -2.43641900 | -1.83151300 |
| H | 1.77467700  | -1.85042000 | -2.71491900 |
| H | 2.91636900  | -3.04571700 | -2.05114000 |
| H | 1.20496700  | -3.10093800 | -1.58891800 |
| C | 2.72316500  | -2.51504600 | 0.95802700  |
| H | 3.55847800  | -3.16567300 | 0.68412700  |
| H | 2.97061200  | -1.97027600 | 1.87106200  |
| H | 1.82621300  | -3.10864900 | 1.14075700  |
| C | -0.71890700 | -2.75122200 | 0.17272400  |
| O | -0.43054100 | -3.93518500 | 0.28142100  |
| O | -0.29623700 | -1.80495800 | 0.95322900  |
| H | -1.39120100 | -2.42077300 | -0.64743500 |
| H | -1.43547500 | 1.99107300  | 0.86066600  |
| C | -1.60156700 | 0.54464300  | 2.44412000  |
| H | -2.62046900 | 0.78596900  | 2.78335100  |
| H | -1.47342100 | -0.53179700 | 2.57220100  |
| C | -2.56398300 | 0.39861300  | 0.06176200  |
| C | -3.35831400 | -0.71690400 | 0.37773000  |
| C | -2.84342600 | 1.06303900  | -1.14795100 |
| C | -4.37441600 | -1.14404000 | -0.47378800 |
| H | -3.17840000 | -1.25724600 | 1.29741700  |
| C | -3.85273900 | 0.63606900  | -2.00155700 |
| H | -2.25626600 | 1.93526700  | -1.41861000 |
| C | -4.62737300 | -0.47557900 | -1.66872800 |
| H | -4.96965900 | -2.00850500 | -0.20017100 |
| H | -4.04225800 | 1.17412600  | -2.92449400 |
| H | -5.41817100 | -0.81147500 | -2.32987100 |
| C | -0.60039800 | 1.28308100  | 3.33799500  |
| H | 0.42864000  | 1.01396400  | 3.08221900  |
| H | -0.70080400 | 2.37035300  | 3.24132000  |
| H | -0.75737300 | 1.03261500  | 4.39074500  |

### TS6<sub>ph</sub>-al-a

|                                              |            |             |                             |
|----------------------------------------------|------------|-------------|-----------------------------|
| Zero-point correction=                       |            |             | 0.425066 (Hartree/Particle) |
| Thermal correction to Energy=                |            |             | 0.454440                    |
| Thermal correction to Enthalpy=              |            |             | 0.455384                    |
| Thermal correction to Gibbs Free Energy=     |            |             | 0.365061                    |
| Sum of electronic and zero-point Energies=   |            |             | -1587.571785                |
| Sum of electronic and thermal Energies=      |            |             | -1587.542412                |
| Sum of electronic and thermal Enthalpies=    |            |             | -1587.541468                |
| Sum of electronic and thermal Free Energies= |            |             | -1587.631791                |
| Pd                                           | 0.31226900 | -0.02430100 | 0.17688200                  |

|   |             |             |             |
|---|-------------|-------------|-------------|
| C | -1.57490900 | 0.47319100  | 1.08959400  |
| P | 0.91782000  | 2.19629100  | 0.17644200  |
| P | 2.34567000  | -0.98118800 | -0.94059900 |
| C | 2.64620000  | 2.46937500  | 0.76206600  |
| H | 2.72142100  | 2.15303800  | 1.80383400  |
| H | 3.34431600  | 1.87344900  | 0.17533500  |
| H | 2.92533500  | 3.52378700  | 0.68539500  |
| C | 0.02425700  | 3.47067600  | 1.16887200  |
| H | -0.00990700 | 3.17105000  | 2.21728000  |
| H | 0.54256600  | 4.42953800  | 1.08667600  |
| H | -0.99847100 | 3.59390400  | 0.81257800  |
| C | 0.90481400  | 2.95468700  | -1.50373500 |
| H | -0.10718800 | 2.90079000  | -1.90855200 |
| H | 1.22748200  | 3.99910400  | -1.47189100 |
| H | 1.56301600  | 2.39492800  | -2.16818900 |
| C | 3.25703600  | -0.05878500 | -2.27071700 |
| H | 2.58170000  | 0.13241100  | -3.10798100 |
| H | 3.62498000  | 0.90116900  | -1.90321700 |
| H | 4.11115300  | -0.63466400 | -2.63790500 |
| C | 2.06094700  | -2.58918000 | -1.79881900 |
| H | 1.29757300  | -2.47065600 | -2.56956200 |
| H | 2.98606100  | -2.94512100 | -2.26058100 |
| H | 1.71398800  | -3.31926600 | -1.06994300 |
| C | 3.68554100  | -1.39251200 | 0.25305100  |
| H | 4.50674100  | -1.92294900 | -0.23671600 |
| H | 4.07474100  | -0.48341400 | 0.71547400  |
| H | 3.23854200  | -2.01732400 | 1.02609400  |
| C | -0.20971700 | -2.64374900 | 0.72393000  |
| O | -1.10021300 | -3.43205000 | 1.01452700  |
| O | 0.89789600  | -2.37350500 | 1.25637200  |
| H | -0.43313100 | -1.99794200 | -0.22732300 |
| H | -1.57045600 | 1.53246500  | 1.33374400  |
| C | -1.76042800 | -0.32435100 | 2.37885500  |
| H | -2.76372200 | -0.07222700 | 2.75668700  |
| H | -1.77507500 | -1.39791600 | 2.19388600  |
| C | -2.52679300 | 0.23151400  | -0.02909400 |
| C | -3.06917200 | -1.03738300 | -0.31261400 |
| C | -2.93222600 | 1.30835200  | -0.84308000 |
| C | -3.96770000 | -1.20818000 | -1.36167900 |
| H | -2.77428400 | -1.90120100 | 0.27159200  |
| C | -3.82906500 | 1.13521400  | -1.88980500 |
| H | -2.54803200 | 2.30227100  | -0.63383900 |
| C | -4.35253500 | -0.12975200 | -2.15636400 |
| H | -4.36932600 | -2.19631300 | -1.55759100 |



|   |             |             |             |
|---|-------------|-------------|-------------|
| H | -4.12859200 | 1.98672600  | -2.49162600 |
| H | -5.05566600 | -0.27057300 | -2.96963300 |
| C | -0.72695800 | -0.01171800 | 3.46497500  |
| H | 0.26629200  | -0.35189000 | 3.16430900  |
| H | -0.68224400 | 1.06213700  | 3.68176500  |
| H | -0.98375100 | -0.52395300 | 4.39584800  |

### M7<sub>ph</sub>-al-a

|                                              |             |             |                             |
|----------------------------------------------|-------------|-------------|-----------------------------|
| Zero-point correction=                       |             |             | 0.421537 (Hartree/Particle) |
| Thermal correction to Energy=                |             |             | 0.452860                    |
| Thermal correction to Enthalpy=              |             |             | 0.453804                    |
| Thermal correction to Gibbs Free Energy=     |             |             | 0.353000                    |
| Sum of electronic and zero-point Energies=   |             |             | -1587.605576                |
| Sum of electronic and thermal Energies=      |             |             | -1587.574254                |
| Sum of electronic and thermal Enthalpies=    |             |             | -1587.573309                |
| Sum of electronic and thermal Free Energies= |             |             | -1587.674113                |
| Pd                                           | 0.35283900  | 0.34160100  | 0.26177800                  |
| C                                            | -1.37079800 | -0.61978700 | 1.14577700                  |
| P                                            | -0.65473200 | 2.56444500  | 0.37086200                  |
| P                                            | 2.46348600  | 0.71958700  | -0.81389000                 |
| C                                            | 0.43774000  | 4.05520700  | 0.49520200                  |
| H                                            | 1.06788800  | 3.97468100  | 1.38345000                  |
| H                                            | 1.08565000  | 4.11492300  | -0.37945200                 |
| H                                            | -0.15077800 | 4.97458900  | 0.56087100                  |
| C                                            | -1.83040300 | 2.92190000  | 1.75292500                  |
| H                                            | -1.31556300 | 2.80048200  | 2.70803900                  |
| H                                            | -2.22093300 | 3.94071800  | 1.68279100                  |
| H                                            | -2.66413600 | 2.22057200  | 1.72905900                  |
| C                                            | -1.67428300 | 2.97901200  | -1.11309100                 |
| H                                            | -2.43708100 | 2.21021200  | -1.24717100                 |
| H                                            | -2.15303800 | 3.95790500  | -1.01895700                 |
| H                                            | -1.03763400 | 2.97622300  | -2.00016300                 |
| C                                            | 3.07869400  | 2.33918500  | -1.48273300                 |
| H                                            | 2.37155500  | 2.73100300  | -2.21709600                 |
| H                                            | 3.17218700  | 3.06417900  | -0.67237900                 |
| H                                            | 4.05455000  | 2.22380100  | -1.96345400                 |
| C                                            | 2.68404400  | -0.36232900 | -2.29414700                 |
| H                                            | 1.91809300  | -0.12712600 | -3.03544000                 |
| H                                            | 3.67324100  | -0.23438900 | -2.74297300                 |
| H                                            | 2.55591600  | -1.40123700 | -1.99086200                 |
| C                                            | 3.88979700  | 0.21957100  | 0.24637500                  |
| H                                            | 4.84044000  | 0.31296100  | -0.28651300                 |
| H                                            | 3.91616100  | 0.84571700  | 1.14032600                  |
| H                                            | 3.74992200  | -0.81556100 | 0.55803100                  |

|   |             |             |             |
|---|-------------|-------------|-------------|
| C | 2.12923500  | -3.97277900 | 0.25408200  |
| O | 1.14595700  | -4.53594400 | 0.49799100  |
| O | 3.12019600  | -3.41398900 | 0.01766900  |
| H | 0.88705800  | -1.14884400 | 0.24764800  |
| H | -1.86582600 | 0.16024700  | 1.73107700  |
| C | -1.06533700 | -1.77246600 | 2.11485800  |
| H | -2.01956300 | -2.14898600 | 2.51778600  |
| H | -0.61020500 | -2.61053000 | 1.58289300  |
| C | -2.27578900 | -0.99541000 | 0.01221700  |
| C | -1.97779900 | -2.05000700 | -0.87186800 |
| C | -3.48984100 | -0.31805600 | -0.19985500 |
| C | -2.83788500 | -2.39790100 | -1.90624100 |
| H | -1.04684900 | -2.59000800 | -0.74628300 |
| C | -4.35015900 | -0.65489700 | -1.24439400 |
| H | -3.77711500 | 0.47460300  | 0.48482700  |
| C | -4.02937800 | -1.69821000 | -2.10772600 |
| H | -2.57576400 | -3.21870700 | -2.56625600 |
| H | -5.27971500 | -0.10917800 | -1.37224800 |
| H | -4.69631900 | -1.96782700 | -2.91900400 |
| C | -0.16947800 | -1.37161200 | 3.28870900  |
| H | 0.80944300  | -1.04077300 | 2.93040300  |
| H | -0.61002400 | -0.54561600 | 3.85813600  |
| H | -0.02285900 | -2.20723700 | 3.98070900  |

#### M6-E

|                                              |             |             |                             |
|----------------------------------------------|-------------|-------------|-----------------------------|
| Zero-point correction=                       |             |             | 0.426932 (Hartree/Particle) |
| Thermal correction to Energy=                |             |             | 0.456801                    |
| Thermal correction to Enthalpy=              |             |             | 0.457745                    |
| Thermal correction to Gibbs Free Energy=     |             |             | 0.365760                    |
| Sum of electronic and zero-point Energies=   |             |             | -1587.607235                |
| Sum of electronic and thermal Energies=      |             |             | -1587.577366                |
| Sum of electronic and thermal Enthalpies=    |             |             | -1587.576422                |
| Sum of electronic and thermal Free Energies= |             |             | -1587.668407                |
| Pd                                           | 0.36174900  | -0.08955800 | 0.29411100                  |
| C                                            | -1.86253700 | -1.03917800 | 2.15999700                  |
| C                                            | -1.65098400 | -0.01201800 | 1.04523000                  |
| P                                            | 2.55392100  | -0.46311600 | -0.85445400                 |
| P                                            | 0.50259600  | 2.21425900  | 0.43550200                  |
| C                                            | 2.98683400  | 0.66283800  | -2.26730200                 |
| H                                            | 2.18872600  | 0.62942700  | -3.01229900                 |
| H                                            | 3.09619800  | 1.69542600  | -1.93100400                 |
| H                                            | 3.92244300  | 0.35574700  | -2.74292200                 |
| C                                            | 2.66212000  | -2.09759300 | -1.70230200                 |
| H                                            | 1.75580900  | -2.27772600 | -2.28099500                 |

|   |             |             |             |
|---|-------------|-------------|-------------|
| H | 3.53290400  | -2.12938700 | -2.36285400 |
| H | 2.75359900  | -2.87171200 | -0.94289500 |
| C | 4.09670700  | -0.44497500 | 0.15479900  |
| H | 3.96346800  | -1.17973500 | 0.94868700  |
| H | 4.97099400  | -0.69738300 | -0.45193100 |
| H | 4.24790400  | 0.53773300  | 0.60488100  |
| C | 0.12342400  | 3.09513800  | -1.13897100 |
| H | 0.81305800  | 2.77014700  | -1.91867400 |
| H | -0.88776600 | 2.83309900  | -1.45513500 |
| H | 0.19922300  | 4.17931300  | -1.01889200 |
| C | 2.17158200  | 2.86184700  | 0.88778900  |
| H | 2.91984500  | 2.53410600  | 0.16745300  |
| H | 2.16754600  | 3.95450800  | 0.92020400  |
| H | 2.45187200  | 2.47577300  | 1.86943200  |
| C | -0.53296800 | 3.14671900  | 1.64842400  |
| H | -0.23455500 | 4.19812700  | 1.66051200  |
| H | -1.58838600 | 3.08639200  | 1.38524800  |
| H | -0.40292700 | 2.72568800  | 2.64673700  |
| C | 0.99003600  | -2.92083400 | 1.01166900  |
| O | 0.12492400  | -2.23346200 | 0.35790100  |
| O | 2.06163700  | -2.54266500 | 1.48097500  |
| H | 0.69054400  | -3.98529000 | 1.12055300  |
| H | -1.83259400 | 0.97612300  | 1.46431200  |
| H | -1.73320900 | -2.04880700 | 1.77383200  |
| H | -1.08785500 | -0.90315100 | 2.92167000  |
| C | -2.47571100 | -0.17009900 | -0.19007800 |
| C | -3.18672400 | 0.92466300  | -0.71643000 |
| C | -2.58452700 | -1.39839800 | -0.87042700 |
| C | -3.96306500 | 0.80862300  | -1.86602300 |
| H | -3.15006700 | 1.87800400  | -0.19700300 |
| C | -3.36099700 | -1.51394500 | -2.01881700 |
| H | -2.02243300 | -2.24813100 | -0.50576400 |
| C | -4.05405700 | -0.41485300 | -2.52646600 |
| H | -4.50753200 | 1.67020500  | -2.23851100 |
| H | -3.42468400 | -2.47216800 | -2.52392700 |
| H | -4.66093100 | -0.51229300 | -3.41974700 |
| C | -3.24593500 | -0.90441100 | 2.82021000  |
| H | -3.36474600 | -1.63723900 | 3.62421000  |
| H | -3.38769100 | 0.09094600  | 3.25507700  |
| H | -4.04866900 | -1.06733700 | 2.09610800  |

**TS5-E**

Zero-point correction=

0.419209 (Hartree/Particle)

Thermal correction to Energy=

0.449384

|                                              |             |             |              |
|----------------------------------------------|-------------|-------------|--------------|
| Thermal correction to Enthalpy=              |             |             | 0.450328     |
| Thermal correction to Gibbs Free Energy=     |             |             | 0.356333     |
| Sum of electronic and zero-point Energies=   |             |             | -1587.574720 |
| Sum of electronic and thermal Energies=      |             |             | -1587.544545 |
| Sum of electronic and thermal Enthalpies=    |             |             | -1587.543601 |
| Sum of electronic and thermal Free Energies= |             |             | -1587.637596 |
| Pd                                           | -0.55805400 | -0.34031400 | 0.42450400   |
| C                                            | 0.49413800  | 1.40052600  | 1.60143500   |
| C                                            | 1.35964600  | 0.28007800  | 1.34595500   |
| P                                            | -2.53443200 | 0.46458900  | -0.73257000  |
| P                                            | -0.25208400 | -2.65748100 | 0.21582200   |
| C                                            | -3.93090700 | -0.67245700 | -1.16318600  |
| H                                            | -3.56850900 | -1.47164000 | -1.81315100  |
| H                                            | -4.33412500 | -1.12541900 | -0.25520000  |
| H                                            | -4.73328300 | -0.13747000 | -1.67946400  |
| C                                            | -2.11567600 | 1.21964800  | -2.36211700  |
| H                                            | -1.59274400 | 0.49419000  | -2.98788500  |
| H                                            | -3.01514100 | 1.56265000  | -2.88222300  |
| H                                            | -1.45751700 | 2.06999600  | -2.17258100  |
| C                                            | -3.41279900 | 1.85945500  | 0.09782800   |
| H                                            | -2.70655300 | 2.68772600  | 0.18459500   |
| H                                            | -4.28146400 | 2.18508000  | -0.48225100  |
| H                                            | -3.73943700 | 1.55897200  | 1.09516700   |
| C                                            | 0.61987100  | -3.15168600 | -1.33377500  |
| H                                            | 0.03847100  | -2.82524600 | -2.19784600  |
| H                                            | 1.59021800  | -2.65337800 | -1.37155500  |
| H                                            | 0.76545600  | -4.23459100 | -1.38658100  |
| C                                            | -1.76760200 | -3.71493200 | 0.16646700   |
| H                                            | -2.40517200 | -3.40384000 | -0.66214800  |
| H                                            | -1.51464100 | -4.77227800 | 0.04569100   |
| H                                            | -2.33060500 | -3.58704300 | 1.09304300   |
| C                                            | 0.74361000  | -3.53460600 | 1.50393400   |
| H                                            | 0.82090300  | -4.60529300 | 1.29250500   |
| H                                            | 1.74594000  | -3.10604600 | 1.53821000   |
| H                                            | 0.27851700  | -3.39575600 | 2.48163400   |
| C                                            | 0.42746000  | 4.20534800  | 0.01444700   |
| O                                            | -0.41059900 | 3.50125100  | -0.56946400  |
| O                                            | 1.24451900  | 3.84142600  | 0.92708400   |
| H                                            | 0.51115100  | 5.27895200  | -0.25932600  |
| H                                            | 1.65547000  | -0.30459600 | 2.21583700   |
| H                                            | 0.96541100  | 2.55359900  | 1.25723100   |
| H                                            | -0.21572700 | 1.62473300  | 0.74075700   |
| C                                            | 2.32040600  | 0.20808800  | 0.22827100   |
| C                                            | 3.39704900  | -0.69358000 | 0.30040200   |

|   |             |             |             |
|---|-------------|-------------|-------------|
| C | 2.21187500  | 1.01827100  | -0.91851200 |
| C | 4.32122600  | -0.79955100 | -0.73405200 |
| H | 3.51671700  | -1.30357800 | 1.19068300  |
| C | 3.13598500  | 0.90725600  | -1.95120700 |
| H | 1.40537600  | 1.73721500  | -0.99769500 |
| C | 4.19183900  | -0.00133200 | -1.86945800 |
| H | 5.14844800  | -1.49600400 | -0.64917700 |
| H | 3.03650100  | 1.54355400  | -2.82373500 |
| H | 4.91242100  | -0.07684000 | -2.67596200 |
| C | -0.13399900 | 1.52061600  | 2.98674500  |
| H | -0.98215700 | 2.20831200  | 2.96735300  |
| H | -0.48554100 | 0.56371800  | 3.38568900  |
| H | 0.59578300  | 1.92984900  | 3.69242000  |

### M7'-E

|                                              |             |             |                             |
|----------------------------------------------|-------------|-------------|-----------------------------|
| Zero-point correction=                       |             |             | 0.423977 (Hartree/Particle) |
| Thermal correction to Energy=                |             |             | 0.455658                    |
| Thermal correction to Enthalpy=              |             |             | 0.456602                    |
| Thermal correction to Gibbs Free Energy=     |             |             | 0.354387                    |
| Sum of electronic and zero-point Energies=   |             |             | -1587.610105                |
| Sum of electronic and thermal Energies=      |             |             | -1587.578424                |
| Sum of electronic and thermal Enthalpies=    |             |             | -1587.577480                |
| Sum of electronic and thermal Free Energies= |             |             | -1587.679695                |
| Pd                                           | -0.86666400 | 0.12497700  | 0.30690400                  |
| C                                            | 0.90498300  | 1.30644000  | 0.88790900                  |
| C                                            | 1.22465400  | -0.05043300 | 1.09179200                  |
| P                                            | -2.35396100 | 1.75338500  | -0.57164800                 |
| P                                            | -1.73899800 | -2.10797900 | 0.26062500                  |
| C                                            | -3.65882500 | 1.26150400  | -1.79538000                 |
| H                                            | -3.18426200 | 0.80153600  | -2.66467100                 |
| H                                            | -4.32253900 | 0.52312900  | -1.34148900                 |
| H                                            | -4.25355600 | 2.11833700  | -2.12700900                 |
| C                                            | -1.58549600 | 3.17874400  | -1.47284000                 |
| H                                            | -1.03681500 | 2.80373900  | -2.33915400                 |
| H                                            | -2.33286000 | 3.90385300  | -1.80967300                 |
| H                                            | -0.86955300 | 3.67940100  | -0.81867600                 |
| C                                            | -3.38622600 | 2.64691100  | 0.68192900                  |
| H                                            | -2.73354200 | 3.12014800  | 1.41782900                  |
| H                                            | -4.01900700 | 3.41148100  | 0.22083300                  |
| H                                            | -4.01898100 | 1.92965200  | 1.20839700                  |
| C                                            | -1.06450900 | -3.14842700 | -1.11346800                 |
| H                                            | -1.34494800 | -2.70780000 | -2.07224700                 |
| H                                            | 0.02525400  | -3.15544900 | -1.05371500                 |
| H                                            | -1.43723200 | -4.17641700 | -1.06908800                 |

|   |             |             |             |
|---|-------------|-------------|-------------|
| C | -3.55799800 | -2.43152300 | 0.08322800  |
| H | -3.91507000 | -1.99269200 | -0.85065300 |
| H | -3.78601700 | -3.50195400 | 0.08134800  |
| H | -4.09417000 | -1.95653400 | 0.90778500  |
| C | -1.35963500 | -3.17472500 | 1.72825300  |
| H | -1.74629600 | -4.19156400 | 1.60850800  |
| H | -0.27772200 | -3.21825200 | 1.86409100  |
| H | -1.79678800 | -2.72995800 | 2.62462200  |
| C | 4.36572900  | 2.70999300  | 0.03280900  |
| O | 3.60015300  | 2.90192500  | -0.87271600 |
| O | 4.19162600  | 1.85112200  | 1.04443100  |
| H | 5.32881200  | 3.22698000  | 0.15472100  |
| H | 1.17101900  | -0.42150100 | 2.11326500  |
| H | 3.34342400  | 1.38438100  | 0.92299000  |
| H | 1.27032400  | 1.79937900  | -0.00923500 |
| C | 2.01638200  | -0.90738900 | 0.18307600  |
| C | 2.52265700  | -2.13084500 | 0.65904100  |
| C | 2.31797500  | -0.55692900 | -1.14715900 |
| C | 3.27791200  | -2.97192500 | -0.15264000 |
| H | 2.32301800  | -2.41750900 | 1.68715000  |
| C | 3.07558200  | -1.39674300 | -1.95574700 |
| H | 1.95507500  | 0.37969400  | -1.55204400 |
| C | 3.55855700  | -2.61210900 | -1.46931800 |
| H | 3.65472400  | -3.90728000 | 0.24769400  |
| H | 3.29265900  | -1.09777500 | -2.97576000 |
| H | 4.14916400  | -3.26280400 | -2.10400200 |
| C | 0.65064700  | 2.23567000  | 2.05839500  |
| H | -0.01776700 | 3.05689300  | 1.78689600  |
| H | 0.20093200  | 1.70462300  | 2.90095300  |
| H | 1.58507100  | 2.69057800  | 2.41510000  |

### M8<sub>ph</sub>-al-a

|                                              |             |             |                             |
|----------------------------------------------|-------------|-------------|-----------------------------|
| Zero-point correction=                       |             |             | 0.409231 (Hartree/Particle) |
| Thermal correction to Energy=                |             |             | 0.436040                    |
| Thermal correction to Enthalpy=              |             |             | 0.436984                    |
| Thermal correction to Gibbs Free Energy=     |             |             | 0.350052                    |
| Sum of electronic and zero-point Energies=   |             |             | -1398.973674                |
| Sum of electronic and thermal Energies=      |             |             | -1398.946866                |
| Sum of electronic and thermal Enthalpies=    |             |             | -1398.945922                |
| Sum of electronic and thermal Free Energies= |             |             | -1399.032854                |
| Pd                                           | 0.50810000  | -0.27620000 | 0.34770000                  |
| C                                            | -1.45360000 | -0.33860000 | 1.25190000                  |
| P                                            | 0.47000000  | 2.14750000  | 0.04990000                  |
| P                                            | 2.57620000  | -0.96960000 | -0.63570000                 |

|   |             |             |             |
|---|-------------|-------------|-------------|
| C | 2.06860000  | 3.08130000  | -0.01050000 |
| H | 2.62550000  | 2.91260000  | 0.91370000  |
| H | 2.67480000  | 2.72540000  | -0.84420000 |
| H | 1.89900000  | 4.15500000  | -0.13080000 |
| C | -0.44310000 | 3.15990000  | 1.29900000  |
| H | 0.00100000  | 3.00700000  | 2.28470000  |
| H | -0.40550000 | 4.22370000  | 1.04930000  |
| H | -1.48490000 | 2.84340000  | 1.34700000  |
| C | -0.32750000 | 2.68050000  | -1.52900000 |
| H | -1.33730000 | 2.26890000  | -1.57430000 |
| H | -0.37140000 | 3.76980000  | -1.61670000 |
| H | 0.23640000  | 2.27610000  | -2.37210000 |
| C | 3.82420000  | 0.11640000  | -1.48000000 |
| H | 3.35170000  | 0.64620000  | -2.31000000 |
| H | 4.20980000  | 0.85520000  | -0.77520000 |
| H | 4.66300000  | -0.46790000 | -1.86990000 |
| C | 2.30820000  | -2.25270000 | -1.93680000 |
| H | 1.74980000  | -1.81640000 | -2.76720000 |
| H | 3.25410000  | -2.65520000 | -2.31050000 |
| H | 1.70650000  | -3.05910000 | -1.51680000 |
| C | 3.65590000  | -1.86040000 | 0.56920000  |
| H | 4.53890000  | -2.28700000 | 0.08480000  |
| H | 3.97480000  | -1.16920000 | 1.35190000  |
| H | 3.07640000  | -2.65530000 | 1.03980000  |
| H | 0.40170000  | -1.83340000 | 0.59530000  |
| H | -1.59280000 | 0.64190000  | 1.71720000  |
| C | -1.64210000 | -1.38620000 | 2.36120000  |
| H | -2.67030000 | -1.30110000 | 2.74920000  |
| H | -1.55400000 | -2.39510000 | 1.95020000  |
| C | -2.43480000 | -0.46490000 | 0.12610000  |
| C | -2.54800000 | -1.63910000 | -0.64290000 |
| C | -3.31230000 | 0.58650000  | -0.19290000 |
| C | -3.47810000 | -1.75020000 | -1.66920000 |
| H | -1.87540000 | -2.46360000 | -0.43650000 |
| C | -4.23860000 | 0.48450000  | -1.23070000 |
| H | -3.28370000 | 1.49490000  | 0.40190000  |
| C | -4.32810000 | -0.68610000 | -1.97780000 |
| H | -3.53750000 | -2.67150000 | -2.24010000 |
| H | -4.90060000 | 1.31790000  | -1.44390000 |
| H | -5.04920000 | -0.77270000 | -2.78300000 |
| C | -0.66860000 | -1.23010000 | 3.53090000  |
| H | 0.36250000  | -1.36390000 | 3.19270000  |
| H | -0.74540000 | -0.23240000 | 3.97740000  |
| H | -0.87350000 | -1.96110000 | 4.31970000  |

**TS7<sub>ph</sub>-al-a**

|                                              |             |             |                             |
|----------------------------------------------|-------------|-------------|-----------------------------|
| Zero-point correction=                       |             |             | 0.407258 (Hartree/Particle) |
| Thermal correction to Energy=                |             |             | 0.434243                    |
| Thermal correction to Enthalpy=              |             |             | 0.435188                    |
| Thermal correction to Gibbs Free Energy=     |             |             | 0.346896                    |
| Sum of electronic and zero-point Energies=   |             |             | -1398.963830                |
| Sum of electronic and thermal Energies=      |             |             | -1398.936844                |
| Sum of electronic and thermal Enthalpies=    |             |             | -1398.935900                |
| Sum of electronic and thermal Free Energies= |             |             | -1399.024192                |
| Pd                                           | 0.53607600  | -0.18867200 | 0.27952500                  |
| C                                            | -1.48033200 | -0.67888100 | 1.20137400                  |
| P                                            | 0.60698800  | 2.26322300  | 0.22862100                  |
| P                                            | 2.52212800  | -1.06843100 | -0.68821300                 |
| C                                            | 2.21560300  | 3.18706900  | 0.20955200                  |
| H                                            | 2.79478000  | 2.92730500  | 1.09836200                  |
| H                                            | 2.79372900  | 2.89300600  | -0.66832500                 |
| H                                            | 2.06500400  | 4.27059000  | 0.18836300                  |
| C                                            | -0.25213800 | 3.14195500  | 1.61622600                  |
| H                                            | 0.24228700  | 2.89966100  | 2.55937200                  |
| H                                            | -0.24808600 | 4.22732700  | 1.47925900                  |
| H                                            | -1.28559000 | 2.79730200  | 1.68192700                  |
| C                                            | -0.23961200 | 3.00295300  | -1.24196100                 |
| H                                            | -1.26257100 | 2.62554600  | -1.29265100                 |
| H                                            | -0.25603200 | 4.09619100  | -1.20072700                 |
| H                                            | 0.27625900  | 2.68776500  | -2.15127000                 |
| C                                            | 3.83716700  | -0.01140500 | -1.46494400                 |
| H                                            | 3.40180300  | 0.56884900  | -2.28149300                 |
| H                                            | 4.22919000  | 0.68722200  | -0.72306100                 |
| H                                            | 4.66412100  | -0.61039900 | -1.85907400                 |
| C                                            | 2.23146600  | -2.28680400 | -2.05174500                 |
| H                                            | 1.70844300  | -1.79360900 | -2.87335600                 |
| H                                            | 3.16676200  | -2.71429100 | -2.42618800                 |
| H                                            | 1.58991100  | -3.08765700 | -1.68093300                 |
| C                                            | 3.55045900  | -2.07592500 | 0.47642500                  |
| H                                            | 4.41624000  | -2.52200000 | -0.02266600                 |
| H                                            | 3.89679400  | -1.44309400 | 1.29592900                  |
| H                                            | 2.93198800  | -2.86711300 | 0.90316100                  |
| H                                            | -0.15723600 | -1.56490600 | 0.58881900                  |
| H                                            | -1.49521000 | 0.22731900  | 1.81198400                  |
| C                                            | -1.77278400 | -1.85386800 | 2.15483100                  |
| H                                            | -2.78999900 | -1.72725100 | 2.55404300                  |
| H                                            | -1.77878100 | -2.80288000 | 1.60858200                  |
| C                                            | -2.46985400 | -0.53383300 | 0.08617500                  |



|   |             |             |             |
|---|-------------|-------------|-------------|
| C | -2.67089600 | -1.54621900 | -0.86794900 |
| C | -3.26864200 | 0.61638200  | -0.02362000 |
| C | -3.61714600 | -1.41312500 | -1.87844900 |
| H | -2.06244300 | -2.44277300 | -0.82137700 |
| C | -4.21232200 | 0.75757600  | -1.03902100 |
| H | -3.15585500 | 1.40761400  | 0.71155900  |
| C | -4.39306800 | -0.25784800 | -1.97511700 |
| H | -3.74698900 | -2.21360400 | -2.59954300 |
| H | -4.81492800 | 1.65862900  | -1.09125400 |
| H | -5.12807100 | -0.15349200 | -2.76529700 |
| C | -0.78889600 | -1.94517200 | 3.32245500  |
| H | 0.23237600  | -2.09220200 | 2.95963300  |
| H | -0.79743800 | -1.02496900 | 3.91597200  |
| H | -1.04073400 | -2.77416600 | 3.99056100  |

### M9<sub>ph</sub>-al-a

|                                              |             |             |                             |
|----------------------------------------------|-------------|-------------|-----------------------------|
| Zero-point correction=                       |             |             | 0.412548 (Hartree/Particle) |
| Thermal correction to Energy=                |             |             | 0.440614                    |
| Thermal correction to Enthalpy=              |             |             | 0.441558                    |
| Thermal correction to Gibbs Free Energy=     |             |             | 0.343484                    |
| Sum of electronic and zero-point Energies=   |             |             | -1399.020801                |
| Sum of electronic and thermal Energies=      |             |             | -1398.992735                |
| Sum of electronic and thermal Enthalpies=    |             |             | -1398.991791                |
| Sum of electronic and thermal Free Energies= |             |             | -1399.089865                |
| Pd                                           | 1.60630000  | 0.23540000  | 0.00880000                  |
| C                                            | -2.84740000 | -0.70350000 | 1.44860000                  |
| P                                            | 1.16910000  | 2.45550000  | 0.55090000                  |
| P                                            | 2.20130000  | -1.93300000 | -0.56340000                 |
| C                                            | 2.59830000  | 3.43760000  | 1.20150000                  |
| H                                            | 2.97560000  | 2.96750000  | 2.11150000                  |
| H                                            | 3.40370000  | 3.43440000  | 0.46480000                  |
| H                                            | 2.31470000  | 4.47180000  | 1.42100000                  |
| C                                            | -0.11090000 | 2.80230000  | 1.84310000                  |
| H                                            | 0.17150000  | 2.30860000  | 2.77480000                  |
| H                                            | -0.22360000 | 3.87560000  | 2.02500000                  |
| H                                            | -1.06920000 | 2.39190000  | 1.51970000                  |
| C                                            | 0.58290000  | 3.55230000  | -0.82070000                 |
| H                                            | -0.35470000 | 3.16000000  | -1.21850000                 |
| H                                            | 0.42650000  | 4.58090000  | -0.48070000                 |
| H                                            | 1.31940000  | 3.54860000  | -1.62640000                 |
| C                                            | 2.83020000  | -2.18800000 | -2.28660000                 |
| H                                            | 2.05680000  | -1.89740000 | -2.99990000                 |
| H                                            | 3.69660000  | -1.54530000 | -2.45280000                 |
| H                                            | 3.11350000  | -3.22960000 | -2.46810000                 |

|   |             |             |             |
|---|-------------|-------------|-------------|
| C | 0.91430000  | -3.26160000 | -0.46450000 |
| H | 0.07570000  | -3.00300000 | -1.11360000 |
| H | 1.31210000  | -4.23680000 | -0.76220000 |
| H | 0.53900000  | -3.32540000 | 0.55860000  |
| C | 3.56730000  | -2.70090000 | 0.42420000  |
| H | 3.80100000  | -3.71310000 | 0.07940000  |
| H | 4.46110000  | -2.07920000 | 0.34720000  |
| H | 3.27580000  | -2.73780000 | 1.47550000  |
| H | -1.80020000 | -0.46580000 | 1.66310000  |
| H | -3.44860000 | -0.22060000 | 2.22820000  |
| C | -3.04230000 | -2.22900000 | 1.54560000  |
| H | -4.08590000 | -2.47320000 | 1.31800000  |
| H | -2.44010000 | -2.71270000 | 0.76900000  |
| C | -3.22140000 | -0.13840000 | 0.09590000  |
| C | -2.24270000 | 0.10960000  | -0.87340000 |
| C | -4.55850000 | 0.12020000  | -0.22910000 |
| C | -2.59250000 | 0.59630000  | -2.13260000 |
| H | -1.19420000 | -0.06370000 | -0.63690000 |
| C | -4.91100000 | 0.60610000  | -1.48580000 |
| H | -5.33150000 | -0.05650000 | 0.51320000  |
| C | -3.92750000 | 0.84440000  | -2.44450000 |
| H | -1.81680000 | 0.78360000  | -2.86750000 |
| H | -5.95270000 | 0.80290000  | -1.71550000 |
| H | -4.19980000 | 1.22430000  | -3.42300000 |
| C | -2.66650000 | -2.78980000 | 2.91970000  |
| H | -1.61850000 | -2.58310000 | 3.15810000  |
| H | -3.27820000 | -2.34390000 | 3.71040000  |
| H | -2.81020000 | -3.87300000 | 2.96040000  |

### Com6<sub>ph</sub>w-b

|                                              |             |             |                             |
|----------------------------------------------|-------------|-------------|-----------------------------|
| Zero-point correction=                       |             |             | 0.449047 (Hartree/Particle) |
| Thermal correction to Energy=                |             |             | 0.483242                    |
| Thermal correction to Enthalpy=              |             |             | 0.484187                    |
| Thermal correction to Gibbs Free Energy=     |             |             | 0.380252                    |
| Sum of electronic and zero-point Energies=   |             |             | -1664.052215                |
| Sum of electronic and thermal Energies=      |             |             | -1664.018020                |
| Sum of electronic and thermal Enthalpies=    |             |             | -1664.017076                |
| Sum of electronic and thermal Free Energies= |             |             | -1664.121010                |
| Pd                                           | -0.19608000 | -0.41633500 | -0.01587300                 |
| C                                            | 0.83699300  | -1.78419200 | -1.43209800                 |
| C                                            | 1.60436300  | -0.60549800 | -1.33719300                 |
| P                                            | -2.19694700 | -1.54748500 | 0.69052700                  |
| P                                            | 0.07790200  | 1.73243800  | 1.08230600                  |
| C                                            | -3.04994600 | -0.97390100 | 2.22907400                  |

|   |             |             |             |
|---|-------------|-------------|-------------|
| H | -2.34454000 | -0.97554700 | 3.06271100  |
| H | -3.40594000 | 0.04389500  | 2.06357400  |
| H | -3.89927100 | -1.61700000 | 2.48055200  |
| C | -2.00293200 | -3.35531300 | 1.05423500  |
| H | -1.24599000 | -3.49535500 | 1.82881100  |
| H | -2.94357200 | -3.79995300 | 1.39323000  |
| H | -1.66482600 | -3.87460300 | 0.15622200  |
| C | -3.62304700 | -1.56967100 | -0.49000100 |
| H | -3.29127200 | -1.91492000 | -1.47085400 |
| H | -4.42421400 | -2.22332000 | -0.13150400 |
| H | -4.01079700 | -0.55308700 | -0.57666700 |
| C | 1.58014100  | 1.81350600  | 2.16142100  |
| H | 1.48517300  | 1.08419900  | 2.96865600  |
| H | 2.46469000  | 1.55512300  | 1.57774300  |
| H | 1.70881400  | 2.80940300  | 2.59629400  |
| C | -1.20664800 | 2.42296200  | 2.22236100  |
| H | -1.32990700 | 1.74857400  | 3.07271400  |
| H | -0.92002300 | 3.41142000  | 2.59505400  |
| H | -2.16466000 | 2.48539600  | 1.70283100  |
| C | 0.36367600  | 3.17894400  | -0.03834700 |
| H | 0.56223400  | 4.09469500  | 0.52685100  |
| H | 1.21780000  | 2.96747100  | -0.68456100 |
| H | -0.51673200 | 3.32862200  | -0.66593500 |
| C | -2.11725300 | 1.57584000  | -2.94830000 |
| O | -1.37864600 | 0.49136100  | -2.80968400 |
| O | -2.56018600 | 2.27397100  | -2.06368600 |
| H | -2.29092700 | 1.78268900  | -4.01412600 |
| H | 0.19261400  | -1.82431400 | -2.30601900 |
| H | 1.42293100  | 0.12077900  | -2.12557700 |
| H | -1.16042300 | 0.30013600  | -1.84891600 |
| C | 2.90475700  | -0.39165700 | -0.66966400 |
| C | 3.73383600  | 0.64137000  | -1.14814200 |
| C | 3.38854300  | -1.14587400 | 0.41610600  |
| C | 4.97520800  | 0.90847000  | -0.58058000 |
| H | 3.39281800  | 1.23807900  | -1.98849000 |
| C | 4.63173700  | -0.88144600 | 0.98217800  |
| H | 2.78116000  | -1.93423900 | 0.83730000  |
| C | 5.43597000  | 0.14583200  | 0.49095600  |
| H | 5.58603800  | 1.71139300  | -0.97960800 |
| H | 4.97303800  | -1.48193400 | 1.81892000  |
| H | 6.40375700  | 0.34793500  | 0.93552400  |
| C | 1.21450200  | -3.15521100 | -0.90221100 |
| H | 2.18872600  | -3.47695700 | -1.29204400 |
| H | 1.26862200  | -3.20854800 | 0.18600500  |

|   |             |             |             |
|---|-------------|-------------|-------------|
| H | 0.47526100  | -3.89356900 | -1.22143500 |
| O | -4.00511200 | 1.77466600  | 0.34173200  |
| H | -3.44029800 | 1.95744800  | -0.42700500 |
| H | -4.73276500 | 2.39825700  | 0.26175100  |

#### TS4<sub>PhW-e</sub>

Zero-point correction= 0.444312 (Hartree/Particle)

Thermal correction to Energy= 0.477495

Thermal correction to Enthalpy= 0.478439

Thermal correction to Gibbs Free Energy= 0.377983

Sum of electronic and zero-point Energies= -1664.021230

Sum of electronic and thermal Energies= -1663.988047

Sum of electronic and thermal Enthalpies= -1663.987103

Sum of electronic and thermal Free Energies= -1664.087559

|    |             |             |             |
|----|-------------|-------------|-------------|
| Pd | 0.27383700  | -0.10441400 | -0.01470200 |
| C  | -0.43383600 | -2.11086600 | 0.81279000  |
| C  | -1.35713400 | -0.99213800 | 1.00447100  |
| P  | 2.23673500  | -0.02887500 | -1.46760300 |
| P  | -0.43478700 | 2.15663800  | 0.18843800  |
| C  | 2.20450400  | 1.15010000  | -2.89543900 |
| H  | 1.29250900  | 1.00048700  | -3.47697100 |
| H  | 2.21463700  | 2.17745500  | -2.52943200 |
| H  | 3.06978400  | 1.00383900  | -3.54819400 |
| C  | 2.61459100  | -1.61947500 | -2.32561300 |
| H  | 1.77281700  | -1.90135100 | -2.96183900 |
| H  | 3.51493000  | -1.53662000 | -2.94155300 |
| H  | 2.75301700  | -2.38838000 | -1.56518000 |
| C  | 3.84597500  | 0.38054200  | -0.66332800 |
| H  | 4.16348100  | -0.48084400 | -0.07554000 |
| H  | 4.61550000  | 0.61298900  | -1.40461700 |
| H  | 3.70883700  | 1.21675200  | 0.02323800  |
| C  | -1.90041100 | 2.67116800  | -0.80796200 |
| H  | -1.66029500 | 2.60404200  | -1.87102700 |
| H  | -2.73478400 | 1.99813200  | -0.60621700 |
| H  | -2.19734700 | 3.69737200  | -0.57347100 |
| C  | 0.77741600  | 3.50252800  | -0.15235800 |
| H  | 1.05285200  | 3.50627400  | -1.20782300 |
| H  | 0.35582500  | 4.47881200  | 0.10390300  |
| H  | 1.66090600  | 3.31154500  | 0.45799800  |
| C  | -0.93435300 | 2.56154900  | 1.91451800  |
| H  | -1.25687500 | 3.60335600  | 1.99967100  |
| H  | -1.74901100 | 1.90807600  | 2.22904500  |
| H  | -0.06525900 | 2.39031100  | 2.55182300  |
| C  | 2.80150400  | -2.02471600 | 1.85316000  |

|   |             |             |             |
|---|-------------|-------------|-------------|
| O | 2.23402600  | -2.46509300 | 0.79531800  |
| O | 2.51890600  | -1.00737300 | 2.49638600  |
| H | 3.64248900  | -2.65811400 | 2.20912400  |
| H | -0.07157700 | -2.44088400 | 1.78732800  |
| H | -1.37224900 | -0.62052600 | 2.02689300  |
| H | 0.95748600  | -1.86456500 | 0.57983800  |
| C | -2.66963200 | -0.82697800 | 0.33576400  |
| C | -3.77492500 | -0.43044700 | 1.10919400  |
| C | -2.88354000 | -1.02859700 | -1.04036400 |
| C | -5.03453600 | -0.25210400 | 0.54314200  |
| H | -3.64134900 | -0.27201600 | 2.17459500  |
| C | -4.14120400 | -0.85250200 | -1.60652000 |
| H | -2.04934300 | -1.29699200 | -1.67529300 |
| C | -5.22603600 | -0.46488000 | -0.81976600 |
| H | -5.86704900 | 0.04962100  | 1.16946500  |
| H | -4.27496900 | -1.01318700 | -2.67089800 |
| H | -6.20519600 | -0.32900700 | -1.26461700 |
| C | -0.73575800 | -3.30221100 | -0.09041000 |
| H | -1.62257300 | -3.84119200 | 0.26058500  |
| H | -0.90835200 | -3.02330100 | -1.12909200 |
| H | 0.11107100  | -3.99067400 | -0.07042900 |
| O | 2.36568800  | 1.73700100  | 2.17746600  |
| H | 2.30146100  | 0.75942400  | 2.20939700  |
| H | 2.99819500  | 1.94366300  | 2.87202700  |

### M6<sub>ph</sub>w-f

Zero-point correction= 0.450746 (Hartree/Particle)

|                                              |              |
|----------------------------------------------|--------------|
| Thermal correction to Energy=                | 0.484240     |
| Thermal correction to Enthalpy=              | 0.485184     |
| Thermal correction to Gibbs Free Energy=     | 0.384067     |
| Sum of electronic and zero-point Energies=   | -1664.045487 |
| Sum of electronic and thermal Energies=      | -1664.011992 |
| Sum of electronic and thermal Enthalpies=    | -1664.011048 |
| Sum of electronic and thermal Free Energies= | -1664.112165 |

|    |             |             |             |
|----|-------------|-------------|-------------|
| Pd | -0.35370000 | 0.00770000  | -0.24920000 |
| C  | 1.76460000  | -1.08350000 | -2.15730000 |
| C  | 1.59070000  | 0.03740000  | -1.13200000 |
| P  | -2.30280000 | -0.50030000 | 1.21530000  |
| P  | -0.45640000 | 2.31100000  | -0.26190000 |
| C  | -3.13840000 | 0.69150000  | 2.36330000  |
| H  | -2.39960000 | 1.15650000  | 3.01910000  |
| H  | -3.64770000 | 1.47620000  | 1.80090000  |
| H  | -3.87790000 | 0.17740000  | 2.98360000  |
| C  | -1.76920000 | -1.81500000 | 2.39260000  |

|   |             |             |             |
|---|-------------|-------------|-------------|
| H | -1.05250000 | -1.38860000 | 3.09790000  |
| H | -2.62030000 | -2.22120000 | 2.94690000  |
| H | -1.26160000 | -2.60830000 | 1.84210000  |
| C | -3.74130000 | -1.25120000 | 0.34390000  |
| H | -3.38690000 | -2.10430000 | -0.23330000 |
| H | -4.51190000 | -1.57480000 | 1.04890000  |
| H | -4.16110000 | -0.53000000 | -0.35910000 |
| C | -0.19620000 | 3.21740000  | 1.32200000  |
| H | -0.88810000 | 2.84440000  | 2.07760000  |
| H | 0.82130000  | 3.03390000  | 1.67250000  |
| H | -0.34850000 | 4.29290000  | 1.19620000  |
| C | -2.14740000 | 2.80870000  | -0.80180000 |
| H | -2.86960000 | 2.56970000  | -0.02110000 |
| H | -2.19810000 | 3.87970000  | -1.01560000 |
| H | -2.40760000 | 2.22810000  | -1.68920000 |
| C | 0.58990000  | 3.28960000  | -1.42460000 |
| H | 0.29840000  | 4.34260000  | -1.39060000 |
| H | 1.64330000  | 3.20860000  | -1.15790000 |
| H | 0.45810000  | 2.91510000  | -2.44090000 |
| C | -0.58230000 | -3.12410000 | -0.83020000 |
| O | 0.12220000  | -3.48000000 | 0.10750000  |
| O | -0.91660000 | -1.92290000 | -1.15290000 |
| H | -1.01540000 | -3.88680000 | -1.51290000 |
| H | 0.94170000  | -1.05270000 | -2.87620000 |
| H | 1.76120000  | 0.99110000  | -1.63010000 |
| H | 1.70860000  | -2.05710000 | -1.66950000 |
| C | 2.43180000  | -0.05240000 | 0.09850000  |
| C | 3.23820000  | 1.02870000  | 0.50140000  |
| C | 2.44400000  | -1.21010000 | 0.90300000  |
| C | 4.01630000  | 0.96740000  | 1.65360000  |
| H | 3.27740000  | 1.92000000  | -0.11740000 |
| C | 3.22210000  | -1.26740000 | 2.05560000  |
| H | 1.82160000  | -2.05770000 | 0.63590000  |
| C | 4.00980000  | -0.18300000 | 2.44090000  |
| H | 4.63820000  | 1.81260000  | 1.93000000  |
| H | 3.21110000  | -2.17000000 | 2.65730000  |
| H | 4.61700000  | -0.23610000 | 3.33770000  |
| C | 3.10280000  | -0.96800000 | -2.90830000 |
| H | 3.17640000  | -0.01760000 | -3.44770000 |
| H | 3.95030000  | -1.02770000 | -2.22030000 |
| H | 3.20690000  | -1.77470000 | -3.64030000 |
| O | -2.47510000 | -0.22320000 | -2.78300000 |
| H | -1.98780000 | -0.91360000 | -2.29340000 |
| H | -2.09330000 | -0.24990000 | -3.66500000 |

**M6<sub>ph</sub>W-1**

|                                              |             |             |                             |
|----------------------------------------------|-------------|-------------|-----------------------------|
| Zero-point correction=                       |             |             | 0.451058 (Hartree/Particle) |
| Thermal correction to Energy=                |             |             | 0.482783                    |
| Thermal correction to Enthalpy=              |             |             | 0.483727                    |
| Thermal correction to Gibbs Free Energy=     |             |             | 0.388004                    |
| Sum of electronic and zero-point Energies=   |             |             | -1664.047275                |
| Sum of electronic and thermal Energies=      |             |             | -1664.015550                |
| Sum of electronic and thermal Enthalpies=    |             |             | -1664.014606                |
| Sum of electronic and thermal Free Energies= |             |             | -1664.110329                |
| Pd                                           | -0.34912200 | 0.13706300  | -0.12280800                 |
| C                                            | 1.36192500  | -0.23715500 | 1.05471300                  |
| C                                            | 2.58694500  | -0.26833900 | 0.17503800                  |
| C                                            | 3.71149300  | 0.50863400  | 0.49981800                  |
| C                                            | 2.68335400  | -1.08639300 | -0.96190100                 |
| C                                            | 4.87185500  | 0.47618900  | -0.27167900                 |
| H                                            | 3.68092500  | 1.13761000  | 1.38309500                  |
| C                                            | 3.83945200  | -1.12400300 | -1.73557500                 |
| H                                            | 1.83074900  | -1.68423500 | -1.25400000                 |
| C                                            | 4.94178000  | -0.34097600 | -1.39652000                 |
| H                                            | 5.72261500  | 1.08690600  | 0.01129700                  |
| H                                            | 3.87786900  | -1.76274800 | -2.61162600                 |
| H                                            | 5.84124300  | -0.36795800 | -2.00108600                 |
| C                                            | 1.23136800  | -1.44068700 | 2.00134800                  |
| P                                            | -0.02803500 | 2.49631300  | 0.03923000                  |
| P                                            | -1.15767000 | -2.16659400 | -0.32827500                 |
| C                                            | -0.10826300 | 3.27820800  | -1.62104500                 |
| H                                            | 0.76386900  | 2.97917700  | -2.20569800                 |
| H                                            | -1.00618400 | 2.91216400  | -2.11709200                 |
| H                                            | -0.13518600 | 4.36810200  | -1.54101700                 |
| C                                            | 1.46670800  | 3.27460600  | 0.78256100                  |
| H                                            | 2.36200900  | 2.95998400  | 0.24588500                  |
| H                                            | 1.37981100  | 4.36296000  | 0.73088300                  |
| H                                            | 1.56754500  | 2.98257400  | 1.82918600                  |
| C                                            | -1.39587200 | 3.28028300  | 0.98495900                  |
| H                                            | -1.28961200 | 3.01709600  | 2.03974200                  |
| H                                            | -1.35718200 | 4.36873800  | 0.88346000                  |
| H                                            | -2.36184600 | 2.90508100  | 0.64080800                  |
| C                                            | -2.48623200 | -2.30613100 | -1.59758200                 |
| H                                            | -3.32856000 | -1.69760400 | -1.25993800                 |
| H                                            | -2.12490400 | -1.97538800 | -2.57450800                 |
| H                                            | -2.80999900 | -3.34690000 | -1.68334600                 |
| C                                            | -2.02415700 | -2.81045200 | 1.16096600                  |
| H                                            | -2.87153400 | -2.14898000 | 1.35367100                  |

|   |             |             |             |
|---|-------------|-------------|-------------|
| H | -2.39431800 | -3.82192300 | 0.97161300  |
| H | -1.35762600 | -2.82882900 | 2.02248500  |
| C | -0.06045100 | -3.57063100 | -0.83174200 |
| H | -0.64166200 | -4.49600300 | -0.86323000 |
| H | 0.34519500  | -3.38188000 | -1.82780600 |
| H | 0.77183800  | -3.70216000 | -0.14122900 |
| C | -4.57696600 | 0.50492600  | 0.59212200  |
| O | -4.37342900 | -0.70570700 | 0.45044300  |
| O | -3.96884800 | 1.46816000  | 0.01072400  |
| H | -5.37299800 | 0.83398100  | 1.29432200  |
| H | 1.43544400  | 0.64250000  | 1.69882500  |
| H | 0.27524200  | -1.36644100 | 2.52685600  |
| H | 1.21259700  | -2.37543700 | 1.43609800  |
| C | 2.35836800  | -1.52270600 | 3.04502000  |
| H | 2.39005200  | -0.61912800 | 3.66211000  |
| H | 2.20393600  | -2.37471100 | 3.71373500  |
| H | 3.33644900  | -1.63843800 | 2.57223100  |
| O | -2.06046100 | 0.83953900  | -1.38676800 |
| H | -2.94251300 | 1.06971200  | -0.78107800 |
| H | -2.34401800 | 0.20333400  | -2.04798400 |

#### TS5<sub>ph</sub>W-a

|                                              |             |             |                             |
|----------------------------------------------|-------------|-------------|-----------------------------|
| Zero-point correction=                       |             |             | 0.450543 (Hartree/Particle) |
| Thermal correction to Energy=                |             |             | 0.481591                    |
| Thermal correction to Enthalpy=              |             |             | 0.482536                    |
| Thermal correction to Gibbs Free Energy=     |             |             | 0.387986                    |
| Sum of electronic and zero-point Energies=   |             |             | -1664.042487                |
| Sum of electronic and thermal Energies=      |             |             | -1664.011439                |
| Sum of electronic and thermal Enthalpies=    |             |             | -1664.010495                |
| Sum of electronic and thermal Free Energies= |             |             | -1664.105044                |
| Pd                                           | -0.29028000 | 0.11656500  | -0.10860900                 |
| C                                            | 1.41225700  | -0.32881600 | 1.06060400                  |
| C                                            | 2.61497400  | -0.38575800 | 0.14830800                  |
| C                                            | 3.77313400  | 0.34075100  | 0.47216200                  |
| C                                            | 2.66449700  | -1.18528800 | -1.00452300                 |
| C                                            | 4.92139900  | 0.27731800  | -0.31551500                 |
| H                                            | 3.77828200  | 0.95483000  | 1.36670100                  |
| C                                            | 3.80803200  | -1.25248400 | -1.79507700                 |
| H                                            | 1.78599600  | -1.74685500 | -1.29265100                 |
| C                                            | 4.94450300  | -0.51971500 | -1.45659900                 |
| H                                            | 5.79890600  | 0.84939700  | -0.03335500                 |
| H                                            | 3.81001800  | -1.87559500 | -2.68312700                 |
| H                                            | 5.83432100  | -0.57006500 | -2.07377700                 |
| C                                            | 1.32771000  | -1.52871200 | 2.04555400                  |



|   |             |             |             |
|---|-------------|-------------|-------------|
| P | 0.10886500  | 2.46779200  | 0.05016800  |
| P | -1.19953400 | -2.12959700 | -0.26719600 |
| C | 0.12702800  | 3.24896500  | -1.61218000 |
| H | 1.01550800  | 2.92278900  | -2.15620100 |
| H | -0.75813000 | 2.90894100  | -2.14817500 |
| H | 0.12857100  | 4.33939200  | -1.53498600 |
| C | 1.59313000  | 3.19600200  | 0.86178100  |
| H | 2.49951100  | 2.85257200  | 0.36258200  |
| H | 1.54655000  | 4.28688200  | 0.81181100  |
| H | 1.63791300  | 2.89659000  | 1.91033700  |
| C | -1.27582400 | 3.29361900  | 0.93373700  |
| H | -1.23167500 | 3.01895100  | 1.98993100  |
| H | -1.19486100 | 4.38067800  | 0.84413100  |
| H | -2.23613700 | 2.95680400  | 0.53852500  |
| C | -2.40031200 | -2.32247700 | -1.65094700 |
| H | -3.25193100 | -1.66892900 | -1.44580300 |
| H | -1.93237000 | -2.07046800 | -2.60568600 |
| H | -2.75266500 | -3.35636000 | -1.69848900 |
| C | -2.24399100 | -2.57891000 | 1.18059700  |
| H | -3.10576400 | -1.90733200 | 1.17998100  |
| H | -2.59260100 | -3.61157700 | 1.09030800  |
| H | -1.69074600 | -2.46878900 | 2.11356500  |
| C | -0.12025500 | -3.61180100 | -0.51143000 |
| H | -0.72635200 | -4.52044000 | -0.46598100 |
| H | 0.35643000  | -3.56173800 | -1.49219500 |
| H | 0.65885700  | -3.66526500 | 0.24770300  |
| C | -4.63827000 | 0.65708000  | 0.26107800  |
| O | -4.51088200 | -0.55739500 | 0.07405100  |
| O | -3.89216400 | 1.59421400  | -0.18867700 |
| H | -5.48530900 | 1.01766800  | 0.88295400  |
| H | 1.52315000  | 0.56087100  | 1.68149500  |
| H | 0.42590400  | -2.12038400 | 1.89628700  |
| H | 2.16666600  | -2.20819900 | 1.85731000  |
| C | 1.36286500  | -1.08638000 | 3.51383300  |
| H | 0.52506100  | -0.41981400 | 3.74138700  |
| H | 1.29922600  | -1.94467100 | 4.18930200  |
| H | 2.28883700  | -0.55085800 | 3.74397800  |
| O | -1.92251800 | 0.86597900  | -1.43066100 |
| H | -2.84024000 | 1.14728400  | -0.88722000 |
| H | -2.18873600 | 0.23602000  | -2.10520100 |

**M6<sub>ph</sub>'w-a**

Zero-point correction=

0.450381 (Hartree/Particle)

Thermal correction to Energy=

0.482257

|                                              |             |             |              |
|----------------------------------------------|-------------|-------------|--------------|
| Thermal correction to Enthalpy=              |             |             | 0.483202     |
| Thermal correction to Gibbs Free Energy=     |             |             | 0.386505     |
| Sum of electronic and zero-point Energies=   |             |             | -1664.051248 |
| Sum of electronic and thermal Energies=      |             |             | -1664.019372 |
| Sum of electronic and thermal Enthalpies=    |             |             | -1664.018428 |
| Sum of electronic and thermal Free Energies= |             |             | -1664.115124 |
| Pd                                           | -0.30967000 | 0.17235900  | -0.16539400  |
| C                                            | 1.35445600  | 0.53801400  | 1.10282700   |
| C                                            | 2.63821500  | 0.35095100  | 0.33754400   |
| C                                            | 3.70610900  | -0.42407100 | 0.81597200   |
| C                                            | 2.83255300  | 1.01656100  | -0.88779200  |
| C                                            | 4.90103400  | -0.53706500 | 0.10428100   |
| H                                            | 3.61778300  | -0.93929700 | 1.76446600   |
| C                                            | 4.02085200  | 0.90767300  | -1.59897100  |
| H                                            | 2.02341300  | 1.61559600  | -1.29165300  |
| C                                            | 5.06652300  | 0.12435900  | -1.10748500  |
| H                                            | 5.70623500  | -1.14278700 | 0.50646500   |
| H                                            | 4.13301300  | 1.43354200  | -2.54115900  |
| H                                            | 5.99468200  | 0.03662500  | -1.66064100  |
| C                                            | 1.26422000  | -0.16991800 | 2.45387000   |
| P                                            | -1.02490000 | 2.46157900  | -0.09059900  |
| P                                            | -0.00123600 | -2.21702700 | -0.26101900  |
| C                                            | -1.35853700 | 3.12222800  | -1.77310600  |
| H                                            | -0.41913700 | 3.22617000  | -2.31982200  |
| H                                            | -1.98629300 | 2.40006600  | -2.29379500  |
| H                                            | -1.85662600 | 4.09400500  | -1.72373100  |
| C                                            | -0.00616300 | 3.79389000  | 0.67844000   |
| H                                            | 0.97140700  | 3.85152200  | 0.19592900   |
| H                                            | -0.50879900 | 4.75911600  | 0.57728600   |
| H                                            | 0.14651900  | 3.59031100  | 1.73966800   |
| C                                            | -2.63480500 | 2.62204300  | 0.78235400   |
| H                                            | -2.47934900 | 2.43506000  | 1.84687300   |
| H                                            | -3.04761100 | 3.62633200  | 0.65154500   |
| H                                            | -3.33882000 | 1.87506500  | 0.40916300   |
| C                                            | -0.90008000 | -2.96325400 | -1.68516200  |
| H                                            | -1.96876300 | -2.80417500 | -1.52170000  |
| H                                            | -0.57439900 | -2.51202500 | -2.62536500  |
| H                                            | -0.70488100 | -4.03804800 | -1.72896500  |
| C                                            | -0.71852800 | -3.15055000 | 1.15219600   |
| H                                            | -1.79739900 | -2.98011200 | 1.14641800   |
| H                                            | -0.52105000 | -4.22008500 | 1.03658400   |
| H                                            | -0.29396100 | -2.80925000 | 2.09657500   |
| C                                            | 1.68679500  | -2.92810400 | -0.44816100  |
| H                                            | 1.62153200  | -4.01099500 | -0.58328900  |

|   |             |             |             |
|---|-------------|-------------|-------------|
| H | 2.18371100  | -2.48372900 | -1.31179800 |
| H | 2.29350500  | -2.71269400 | 0.42996600  |
| C | -4.31296000 | -1.33624400 | 0.19077700  |
| O | -3.63358900 | -2.34915200 | -0.00655000 |
| O | -4.10494600 | -0.16109100 | -0.27102200 |
| H | -5.21505600 | -1.41251600 | 0.83490800  |
| H | 1.25396500  | 1.60737700  | 1.29176600  |
| H | 1.35776300  | -1.25430500 | 2.33293700  |
| H | 2.12644200  | 0.13245300  | 3.06695300  |
| C | -0.01231700 | 0.14462700  | 3.23969500  |
| H | -0.90544400 | -0.17610500 | 2.69759300  |
| H | -0.00695300 | -0.35273600 | 4.21374700  |
| H | -0.10327200 | 1.22019700  | 3.42346900  |
| O | -2.04446900 | 0.06477000  | -1.56448400 |
| H | -2.97891600 | -0.08481100 | -1.00392800 |
| H | -1.98655800 | -0.66962200 | -2.18129900 |

#### M6<sub>ph</sub>'w-g

|                                              |             |             |                             |
|----------------------------------------------|-------------|-------------|-----------------------------|
| Zero-point correction=                       |             |             | 0.452171 (Hartree/Particle) |
| Thermal correction to Energy=                |             |             | 0.484822                    |
| Thermal correction to Enthalpy=              |             |             | 0.485766                    |
| Thermal correction to Gibbs Free Energy=     |             |             | 0.388701                    |
| Sum of electronic and zero-point Energies=   |             |             | -1664.058929                |
| Sum of electronic and thermal Energies=      |             |             | -1664.026278                |
| Sum of electronic and thermal Enthalpies=    |             |             | -1664.025333                |
| Sum of electronic and thermal Free Energies= |             |             | -1664.122398                |
| Pd                                           | 0.48418000  | -0.02455900 | -0.19666400                 |
| C                                            | -0.94015100 | -0.97530900 | 1.06889400                  |
| C                                            | -2.29103300 | -1.01185000 | 0.41571800                  |
| C                                            | -3.43148300 | -0.40669800 | 0.96777500                  |
| C                                            | -2.46503400 | -1.71899100 | -0.78999000                 |
| C                                            | -4.67529100 | -0.48664700 | 0.33854700                  |
| H                                            | -3.35940500 | 0.11769300  | 1.91229700                  |
| C                                            | -3.70078000 | -1.80410100 | -1.41678000                 |
| H                                            | -1.60186000 | -2.19449800 | -1.24446600                 |
| C                                            | -4.81928000 | -1.18117700 | -0.85760200                 |
| H                                            | -5.53570000 | -0.00896200 | 0.79548200                  |
| H                                            | -3.79554200 | -2.35662600 | -2.34559900                 |
| H                                            | -5.78538800 | -1.24446200 | -1.34523600                 |
| C                                            | -0.89399100 | -0.43515400 | 2.49928300                  |
| P                                            | 1.90742800  | -1.94088400 | -0.22658200                 |
| P                                            | -0.75624400 | 2.02512800  | -0.44063100                 |
| C                                            | 2.42188600  | -2.33753200 | -1.94856500                 |
| H                                            | 1.55855400  | -2.70967700 | -2.50388200                 |

|   |             |             |             |
|---|-------------|-------------|-------------|
| H | 2.76117700  | -1.41913700 | -2.42623900 |
| H | 3.21353400  | -3.09137500 | -1.96578700 |
| C | 1.37543000  | -3.58946900 | 0.41084600  |
| H | 0.47726300  | -3.92458100 | -0.11148800 |
| H | 2.16792700  | -4.32708000 | 0.26039100  |
| H | 1.14909100  | -3.52957500 | 1.47648600  |
| C | 3.49142700  | -1.66485800 | 0.66818000  |
| H | 3.28528900  | -1.62323300 | 1.73921400  |
| H | 4.20449900  | -2.46928300 | 0.46754700  |
| H | 3.91155900  | -0.70241700 | 0.37600700  |
| C | 0.28741800  | 3.40053900  | -1.07445400 |
| H | 1.04389400  | 3.63145700  | -0.32454000 |
| H | 0.77767800  | 3.08822800  | -1.99536600 |
| H | -0.32824300 | 4.28457500  | -1.26160900 |
| C | -1.57867800 | 2.82590600  | 0.99605500  |
| H | -0.81915500 | 2.98445100  | 1.76264400  |
| H | -2.00605000 | 3.78675000  | 0.69633600  |
| H | -2.37385600 | 2.19269000  | 1.38693500  |
| C | -2.08484500 | 1.91650800  | -1.71297700 |
| H | -2.56421500 | 2.88873400  | -1.85797600 |
| H | -1.64402100 | 1.59169400  | -2.65733500 |
| H | -2.83375700 | 1.18462500  | -1.41222700 |
| C | 3.02185500  | 1.40886100  | -1.22027300 |
| O | 3.36265200  | 1.66612500  | -0.05760000 |
| O | 1.97490100  | 0.80306700  | -1.62146600 |
| H | 3.69607000  | 1.72354700  | -2.04466100 |
| H | -0.57603800 | -2.00289500 | 1.08703200  |
| H | -1.20640000 | 0.61077800  | 2.53114600  |
| H | -1.63219100 | -0.99098800 | 3.09838400  |
| C | 0.47285700  | -0.54741200 | 3.18174900  |
| H | 1.19933500  | 0.12097800  | 2.71599200  |
| H | 0.39701300  | -0.26925400 | 4.23725200  |
| H | 0.85432100  | -1.57387000 | 3.14438800  |
| O | 1.67922800  | 2.59670200  | 1.92256400  |
| H | 2.29642000  | 3.04480100  | 2.50791100  |
| H | 2.25204900  | 2.17010300  | 1.24926500  |

### M6w-E<sub>1</sub>

|                                            |                             |
|--------------------------------------------|-----------------------------|
| Zero-point correction=                     | 0.450615 (Hartree/Particle) |
| Thermal correction to Energy=              | 0.482736                    |
| Thermal correction to Enthalpy=            | 0.483680                    |
| Thermal correction to Gibbs Free Energy=   | 0.385646                    |
| Sum of electronic and zero-point Energies= | -1664.046895                |
| Sum of electronic and thermal Energies=    | -1664.014775                |

|                                              |             |             |              |
|----------------------------------------------|-------------|-------------|--------------|
| Sum of electronic and thermal Enthalpies=    |             |             | -1664.013831 |
| Sum of electronic and thermal Free Energies= |             |             | -1664.111864 |
| Pd                                           | -0.55052100 | 0.12740200  | 0.05548700   |
| C                                            | 1.54973500  | 0.78290000  | -1.98412300  |
| C                                            | 1.22026700  | 1.19972300  | -0.54919200  |
| P                                            | -2.28603300 | -1.46952700 | 0.84731500   |
| P                                            | -1.88867500 | 1.91833100  | -0.52118100  |
| C                                            | -4.06040800 | -1.08818900 | 1.23483200   |
| H                                            | -4.11678600 | -0.34274800 | 2.03096800   |
| H                                            | -4.57388300 | -0.69447100 | 0.35522700   |
| H                                            | -4.58751100 | -1.98702500 | 1.56697900   |
| C                                            | -1.72488700 | -2.24626400 | 2.41706600   |
| H                                            | -1.74577900 | -1.50531100 | 3.21905800   |
| H                                            | -2.35549000 | -3.09610400 | 2.69219700   |
| H                                            | -0.69415500 | -2.56304100 | 2.26202300   |
| C                                            | -2.46070600 | -2.89657100 | -0.30514500  |
| H                                            | -1.47466700 | -3.28316400 | -0.56408200  |
| H                                            | -3.06152000 | -3.69291100 | 0.14342900   |
| H                                            | -2.94541900 | -2.56104400 | -1.22477300  |
| C                                            | -2.90801000 | 2.61942400  | 0.84820600   |
| H                                            | -3.52493100 | 1.83679300  | 1.28932800   |
| H                                            | -2.24717300 | 3.00905500  | 1.62456000   |
| H                                            | -3.55379500 | 3.42534500  | 0.48922100   |
| C                                            | -3.15303300 | 1.47899900  | -1.79255400  |
| H                                            | -3.75868400 | 0.64247400  | -1.44357000  |
| H                                            | -3.80670300 | 2.32723800  | -2.01300600  |
| H                                            | -2.64622800 | 1.16957500  | -2.70828600  |
| C                                            | -1.17412900 | 3.45343800  | -1.25444000  |
| H                                            | -1.97493300 | 4.13639000  | -1.54895500  |
| H                                            | -0.53120300 | 3.95583500  | -0.53043200  |
| H                                            | -0.57426900 | 3.20767300  | -2.13180200  |
| C                                            | 1.86311100  | -3.33027400 | -2.01406000  |
| O                                            | 0.80095200  | -3.33416000 | -1.25093600  |
| O                                            | 2.78174800  | -2.53427100 | -1.99423300  |
| H                                            | 1.84638800  | -4.17512400 | -2.72732800  |
| H                                            | 0.94924500  | 2.25444100  | -0.52493300  |
| H                                            | 1.81836100  | -0.27387700 | -2.02542700  |
| H                                            | 0.64885700  | 0.88514600  | -2.60040700  |
| C                                            | 2.26953500  | 0.98138300  | 0.48729800   |
| C                                            | 2.30926900  | 1.81663300  | 1.62073200   |
| C                                            | 3.24947600  | -0.02671400 | 0.39078900   |
| C                                            | 3.26915600  | 1.65737400  | 2.61138000   |
| H                                            | 1.56848000  | 2.60513000  | 1.71652800   |
| C                                            | 4.21434700  | -0.18253100 | 1.38678900   |

|   |            |             |             |
|---|------------|-------------|-------------|
| H | 3.26421800 | -0.69291900 | -0.46457400 |
| C | 4.23100100 | 0.65169300  | 2.50098100  |
| H | 3.27268700 | 2.32047300  | 3.47023600  |
| H | 4.95852300 | -0.96493300 | 1.28317500  |
| H | 4.98403800 | 0.52607700  | 3.27085700  |
| C | 2.67459900 | 1.62176600  | -2.61885200 |
| H | 2.85995800 | 1.30309900  | -3.64882300 |
| H | 2.41708400 | 2.68657200  | -2.63692000 |
| H | 3.60973200 | 1.51714800  | -2.06443000 |
| O | 0.59929400 | -1.59139200 | 0.47511300  |
| H | 1.46091300 | -1.31332500 | 0.80505700  |
| H | 0.78736900 | -2.53315400 | -0.52327800 |

### TS5w-E<sub>1</sub>

|                                              |             |             |                             |
|----------------------------------------------|-------------|-------------|-----------------------------|
| Zero-point correction=                       |             |             | 0.444220 (Hartree/Particle) |
| Thermal correction to Energy=                |             |             | 0.477462                    |
| Thermal correction to Enthalpy=              |             |             | 0.478406                    |
| Thermal correction to Gibbs Free Energy=     |             |             | 0.376600                    |
| Sum of electronic and zero-point Energies=   |             |             | -1664.019701                |
| Sum of electronic and thermal Energies=      |             |             | -1663.986459                |
| Sum of electronic and thermal Enthalpies=    |             |             | -1663.985515                |
| Sum of electronic and thermal Free Energies= |             |             | -1664.087321                |
| Pd                                           | -0.77865900 | -0.17401400 | -0.40789200                 |
| C                                            | 1.34756000  | -0.56019200 | -1.38885500                 |
| C                                            | 0.98519000  | 0.83307600  | -1.18918700                 |
| P                                            | -1.78622900 | -2.16115400 | 0.57506600                  |
| P                                            | -2.24001200 | 1.64773900  | -0.31967700                 |
| C                                            | -3.56037100 | -2.56819300 | 0.23803900                  |
| H                                            | -4.20364300 | -1.75103800 | 0.56858900                  |
| H                                            | -3.70494300 | -2.70020400 | -0.83630100                 |
| H                                            | -3.86183100 | -3.48635000 | 0.75037200                  |
| C                                            | -1.72003600 | -2.15618500 | 2.41891300                  |
| H                                            | -2.27717900 | -1.30473500 | 2.81425900                  |
| H                                            | -2.12632900 | -3.08010800 | 2.84057800                  |
| H                                            | -0.67268700 | -2.05529700 | 2.70570800                  |
| C                                            | -0.94871800 | -3.75694900 | 0.18240600                  |
| H                                            | 0.07448000  | -3.69301600 | 0.55933300                  |
| H                                            | -1.46363000 | -4.60101900 | 0.65148500                  |
| H                                            | -0.92447000 | -3.90922800 | -0.89834200                 |
| C                                            | -1.97583000 | 2.73478200  | 1.14659200                  |
| H                                            | -2.13419800 | 2.15617600  | 2.05834800                  |
| H                                            | -0.94516700 | 3.09280600  | 1.14816400                  |
| H                                            | -2.65840600 | 3.58953800  | 1.13945500                  |
| C                                            | -4.05234700 | 1.29771000  | -0.21309200                 |

|   |             |             |             |
|---|-------------|-------------|-------------|
| H | -4.26099800 | 0.72316800  | 0.69097600  |
| H | -4.63482600 | 2.22316200  | -0.18561400 |
| H | -4.36455700 | 0.70524500  | -1.07492200 |
| C | -2.19712100 | 2.85782600  | -1.71597500 |
| H | -2.91252300 | 3.67110400  | -1.56274400 |
| H | -1.19439800 | 3.27812800  | -1.79982400 |
| H | -2.43252000 | 2.34546000  | -2.65059200 |
| C | 4.49150800  | -1.77190600 | -0.69018600 |
| O | 3.94503900  | -2.55682900 | 0.10012200  |
| O | 3.98009800  | -0.79346500 | -1.32072400 |
| H | 5.57296700  | -1.92045200 | -0.89680600 |
| H | 0.78819100  | 1.39756700  | -2.09940800 |
| H | 2.58831100  | -0.67086900 | -1.22131100 |
| H | 1.12396800  | -1.21669300 | -0.51087400 |
| C | 1.53600900  | 1.65960000  | -0.09654400 |
| C | 1.60801300  | 3.05438100  | -0.25708200 |
| C | 2.00914400  | 1.10557400  | 1.10865500  |
| C | 2.11622300  | 3.87266400  | 0.74689900  |
| H | 1.28119400  | 3.49630800  | -1.19351900 |
| C | 2.51383800  | 1.92784800  | 2.10981300  |
| H | 1.98276800  | 0.03254000  | 1.26395600  |
| C | 2.56793400  | 3.31177600  | 1.93998300  |
| H | 2.17147800  | 4.94493400  | 0.59318600  |
| H | 2.87842200  | 1.48320200  | 3.02947500  |
| H | 2.96991400  | 3.94401700  | 2.72365600  |
| C | 1.05942700  | -1.18616000 | -2.75590400 |
| H | 1.15901300  | -2.27252100 | -2.70500700 |
| H | 0.06158400  | -0.95668900 | -3.14182500 |
| H | 1.79350500  | -0.83035100 | -3.48491500 |
| O | 1.72872100  | -2.38718800 | 1.56461700  |
| H | 2.10996800  | -2.51427800 | 2.43837200  |
| H | 2.51506300  | -2.44870000 | 0.95931700  |

### M7w'-E<sub>1</sub>

|                                              |             |             |                             |
|----------------------------------------------|-------------|-------------|-----------------------------|
| Zero-point correction=                       |             |             | 0.448810 (Hartree/Particle) |
| Thermal correction to Energy=                |             |             | 0.483504                    |
| Thermal correction to Enthalpy=              |             |             | 0.484448                    |
| Thermal correction to Gibbs Free Energy=     |             |             | 0.377353                    |
| Sum of electronic and zero-point Energies=   |             |             | -1664.050359                |
| Sum of electronic and thermal Energies=      |             |             | -1664.015664                |
| Sum of electronic and thermal Enthalpies=    |             |             | -1664.014720                |
| Sum of electronic and thermal Free Energies= |             |             | -1664.121815                |
| Pd                                           | -0.93639900 | -0.13757600 | -0.44739800                 |
| C                                            | 1.00319900  | -0.89727100 | -1.16324800                 |

|   |             |             |             |
|---|-------------|-------------|-------------|
| C | 1.07910400  | 0.51041200  | -1.18839000 |
| P | -2.00196500 | -2.06897400 | 0.45370400  |
| P | -2.27430000 | 1.82827500  | -0.20444000 |
| C | -3.65154400 | -2.58125100 | -0.22223100 |
| H | -4.36017400 | -1.75678900 | -0.12185300 |
| H | -3.55079700 | -2.80953400 | -1.28539000 |
| H | -4.04925400 | -3.46084400 | 0.29354700  |
| C | -2.38543300 | -1.94812200 | 2.26306000  |
| H | -3.04736800 | -1.09920900 | 2.44459200  |
| H | -2.85937400 | -2.85953200 | 2.64047200  |
| H | -1.45668500 | -1.77759100 | 2.81041600  |
| C | -1.09082000 | -3.67866700 | 0.41565400  |
| H | -0.11978600 | -3.55073000 | 0.89957700  |
| H | -1.65154100 | -4.47251200 | 0.91947400  |
| H | -0.91968800 | -3.97447600 | -0.62173700 |
| C | -1.82988600 | 2.87308200  | 1.25769700  |
| H | -1.98802200 | 2.30008200  | 2.17347600  |
| H | -0.77044700 | 3.13004900  | 1.20275800  |
| H | -2.42467000 | 3.79070600  | 1.30208200  |
| C | -4.11542000 | 1.70766200  | -0.00190300 |
| H | -4.34491800 | 1.10349500  | 0.87843500  |
| H | -4.58268800 | 2.69086100  | 0.11156900  |
| H | -4.54442600 | 1.20985500  | -0.87427100 |
| C | -2.17971000 | 3.07991800  | -1.56939400 |
| H | -2.78924600 | 3.96458900  | -1.35985600 |
| H | -1.14016500 | 3.38582600  | -1.69934000 |
| H | -2.51839900 | 2.62621000  | -2.50309000 |
| C | 4.85307700  | -1.48723200 | -0.69045200 |
| O | 4.37644300  | -2.06181400 | 0.25739900  |
| O | 4.21958300  | -0.67393900 | -1.52642800 |
| H | 5.90782400  | -1.57590900 | -0.98396300 |
| H | 0.96187600  | 0.99531900  | -2.15508900 |
| H | 3.28119500  | -0.56900600 | -1.26518900 |
| H | 1.41666700  | -1.43770300 | -0.31648500 |
| C | 1.69107000  | 1.36930500  | -0.15269200 |
| C | 1.93697600  | 2.72462700  | -0.43958500 |
| C | 2.06973200  | 0.89761200  | 1.11996100  |
| C | 2.51540300  | 3.57455300  | 0.49793200  |
| H | 1.67253300  | 3.11002400  | -1.41965800 |
| C | 2.65003600  | 1.74927700  | 2.05380000  |
| H | 1.90534500  | -0.14190600 | 1.37861900  |
| C | 2.87470500  | 3.09363400  | 1.75572700  |
| H | 2.69255900  | 4.61403500  | 0.24231800  |
| H | 2.93172300  | 1.35960100  | 3.02675800  |



|   |            |             |             |
|---|------------|-------------|-------------|
| H | 3.32752600 | 3.75178200  | 2.48843800  |
| C | 0.88367900 | -1.69779500 | -2.44531000 |
| H | 0.34763600 | -2.63571900 | -2.28529500 |
| H | 0.35165300 | -1.13642200 | -3.21730300 |
| H | 1.87096300 | -1.95969700 | -2.85129200 |
| O | 2.00531600 | -2.72134400 | 1.78392000  |
| H | 2.22416100 | -2.39624600 | 2.66196400  |
| H | 2.80858900 | -2.56131400 | 1.26378500  |

### M6<sub>ph</sub>w-m

|                                              |             |             |                             |
|----------------------------------------------|-------------|-------------|-----------------------------|
| Zero-point correction=                       |             |             | 0.452168 (Hartree/Particle) |
| Thermal correction to Energy=                |             |             | 0.484899                    |
| Thermal correction to Enthalpy=              |             |             | 0.485843                    |
| Thermal correction to Gibbs Free Energy=     |             |             | 0.387961                    |
| Sum of electronic and zero-point Energies=   |             |             | -1664.049623                |
| Sum of electronic and thermal Energies=      |             |             | -1664.016892                |
| Sum of electronic and thermal Enthalpies=    |             |             | -1664.015947                |
| Sum of electronic and thermal Free Energies= |             |             | -1664.113830                |
| Pd                                           | 0.38554500  | 0.06040200  | -0.31426100                 |
| C                                            | -1.58730700 | 0.49287400  | -1.06451100                 |
| C                                            | -2.52096200 | 0.07021000  | 0.01942100                  |
| C                                            | -3.01595900 | 1.02007800  | 0.93439700                  |
| C                                            | -2.95788300 | -1.25795600 | 0.17960000                  |
| C                                            | -3.87956700 | 0.66758100  | 1.96541000                  |
| H                                            | -2.72718100 | 2.06082200  | 0.82162500                  |
| C                                            | -3.82443300 | -1.61347200 | 1.21041600                  |
| H                                            | -2.58639500 | -2.01928300 | -0.49175200                 |
| C                                            | -4.28829600 | -0.65749600 | 2.11356800                  |
| H                                            | -4.24366400 | 1.42838200  | 2.64785500                  |
| H                                            | -4.13886300 | -2.64713300 | 1.30814400                  |
| H                                            | -4.96497400 | -0.93812000 | 2.91266700                  |
| C                                            | -1.75872600 | -0.15285200 | -2.44098200                 |
| P                                            | 0.75915200  | 2.31354800  | 0.02719900                  |
| P                                            | 2.59012000  | -0.73195500 | 0.57964100                  |
| C                                            | 0.54669500  | 2.82838400  | 1.78436700                  |
| H                                            | -0.47443900 | 2.60571300  | 2.09790500                  |
| H                                            | 1.22226400  | 2.25695700  | 2.42095600                  |
| H                                            | 0.74292200  | 3.89638600  | 1.91203200                  |
| C                                            | -0.23517000 | 3.59348300  | -0.86035600                 |
| H                                            | -1.27875700 | 3.56477900  | -0.54857000                 |
| H                                            | 0.16746600  | 4.58629100  | -0.64429000                 |
| H                                            | -0.19294100 | 3.41737400  | -1.93652700                 |
| C                                            | 2.45710900  | 2.91260300  | -0.38165000                 |
| H                                            | 2.64756600  | 2.75437400  | -1.44465500                 |

|   |             |             |             |
|---|-------------|-------------|-------------|
| H | 2.55295400  | 3.97777100  | -0.15572000 |
| H | 3.20864600  | 2.36449000  | 0.18417300  |
| C | 4.00668500  | -0.58899100 | -0.59333400 |
| H | 3.72722400  | -1.13516200 | -1.49503900 |
| H | 4.18815100  | 0.45341300  | -0.85943200 |
| H | 4.92046200  | -1.01304000 | -0.16766000 |
| C | 2.66436600  | -2.50992300 | 1.05525700  |
| H | 2.54721900  | -3.12076600 | 0.16195100  |
| H | 3.63273900  | -2.72992800 | 1.51354900  |
| H | 1.86210800  | -2.73062400 | 1.75936400  |
| C | 3.24572700  | 0.03744300  | 2.13452700  |
| H | 4.19648400  | -0.41866800 | 2.42381900  |
| H | 3.40082100  | 1.11146500  | 2.01998700  |
| H | 2.52196000  | -0.12519100 | 2.93592200  |
| O | -0.11207600 | -2.01314400 | -0.68180400 |
| H | -1.67123700 | 1.57028400  | -1.18776800 |
| H | -0.91449700 | 0.13429400  | -3.07568000 |
| H | -1.71644600 | -1.23870200 | -2.36289000 |
| C | -3.06913500 | 0.26695800  | -3.13061200 |
| H | -3.11826600 | 1.35274900  | -3.26497400 |
| H | -3.15248800 | -0.19380100 | -4.11958300 |
| H | -3.94163600 | -0.03381600 | -2.54476300 |
| O | 1.59628500  | -2.27805400 | -2.13314500 |
| C | 0.59501800  | -2.66516000 | -1.54466700 |
| H | 0.20565200  | -3.68920700 | -1.72298100 |
| H | -0.38210100 | -2.33020300 | 1.15561800  |
| O | -0.38873800 | -2.26631300 | 2.12697400  |
| H | -1.24765300 | -1.87677000 | 2.31879300  |

### M6<sub>ph</sub>w-al-a

|                                              |             |             |                             |
|----------------------------------------------|-------------|-------------|-----------------------------|
| Zero-point correction=                       |             |             | 0.451983 (Hartree/Particle) |
| Thermal correction to Energy=                |             |             | 0.484673                    |
| Thermal correction to Enthalpy=              |             |             | 0.485618                    |
| Thermal correction to Gibbs Free Energy=     |             |             | 0.387458                    |
| Sum of electronic and zero-point Energies=   |             |             | -1664.043086                |
| Sum of electronic and thermal Energies=      |             |             | -1664.010395                |
| Sum of electronic and thermal Enthalpies=    |             |             | -1664.009451                |
| Sum of electronic and thermal Free Energies= |             |             | -1664.107611                |
| Pd                                           | -0.29314500 | -0.19180100 | 0.13623100                  |
| C                                            | 1.57166200  | -0.68451900 | 1.09458500                  |
| P                                            | -0.89131200 | -2.41870000 | -0.00165900                 |
| P                                            | -2.42030300 | 0.76591400  | -0.84046900                 |
| C                                            | -2.54198500 | -2.79764200 | 0.73271200                  |
| H                                            | -2.50492000 | -2.60553300 | 1.80653200                  |

|   |             |             |             |
|---|-------------|-------------|-------------|
| H | -3.31009700 | -2.15675700 | 0.30139900  |
| H | -2.81497000 | -3.84309000 | 0.56627700  |
| C | 0.12660100  | -3.75213100 | 0.76794700  |
| H | 0.23072900  | -3.57422200 | 1.83901400  |
| H | -0.35640200 | -4.72033000 | 0.61323800  |
| H | 1.12306000  | -3.78132300 | 0.32625800  |
| C | -1.03676300 | -3.03438700 | -1.73406800 |
| H | -0.06505900 | -2.95048600 | -2.22395700 |
| H | -1.36177100 | -4.07800500 | -1.75639500 |
| H | -1.74815100 | -2.42516400 | -2.29034800 |
| C | -3.47214900 | -0.14706300 | -2.06624800 |
| H | -2.89659000 | -0.33743000 | -2.97488900 |
| H | -3.81076500 | -1.10388300 | -1.66505600 |
| H | -4.35238100 | 0.44492600  | -2.33106500 |
| C | -2.20792700 | 2.38260800  | -1.69675600 |
| H | -1.49239200 | 2.29270500  | -2.51572700 |
| H | -3.16618600 | 2.73025300  | -2.09225600 |
| H | -1.83121700 | 3.10854400  | -0.97736900 |
| C | -3.62572700 | 1.19993000  | 0.48531300  |
| H | -4.56352600 | 1.56269000  | 0.05471500  |
| H | -3.83243900 | 0.33368500  | 1.11633400  |
| H | -3.18447000 | 1.99461800  | 1.09312700  |
| C | 0.74627500  | 2.67744000  | -0.38737800 |
| O | 0.70521900  | 3.89470800  | -0.30609700 |
| O | 0.19285800  | 1.86073800  | 0.46328700  |
| H | 1.27715200  | 2.18722100  | -1.22679200 |
| H | 1.58524700  | -1.76285100 | 1.23809100  |
| C | 1.60099700  | 0.00538900  | 2.45578700  |
| H | 2.61511100  | -0.10099800 | 2.87011300  |
| H | 1.42176800  | 1.07550900  | 2.33986500  |
| C | 2.64190700  | -0.32010400 | 0.12244600  |
| C | 3.37151700  | 0.87808400  | 0.20509200  |
| C | 2.98589100  | -1.21057500 | -0.91346800 |
| C | 4.38492700  | 1.17094100  | -0.70489600 |
| H | 3.14820200  | 1.58916100  | 0.98947600  |
| C | 3.99317600  | -0.91950600 | -1.82422700 |
| H | 2.45228900  | -2.15247500 | -0.99843500 |
| C | 4.70050000  | 0.27949600  | -1.72647600 |
| H | 4.92817300  | 2.10509700  | -0.61313100 |
| H | 4.23394700  | -1.63024800 | -2.60781400 |
| H | 5.48894800  | 0.51063800  | -2.43366300 |
| C | 0.59846300  | -0.56689300 | 3.46257200  |
| H | -0.43030500 | -0.42318600 | 3.11991500  |
| H | 0.75729700  | -1.63958900 | 3.62224800  |

|   |             |             |            |
|---|-------------|-------------|------------|
| H | 0.69583000  | -0.07378200 | 4.43334100 |
| O | -1.63701000 | 3.59284000  | 1.64519500 |
| H | -0.96347700 | 2.91673200  | 1.43905700 |
| H | -1.22643500 | 4.36951100  | 1.24648500 |

**TS6<sub>ph</sub>W-a**

Zero-point correction= 0.445026 (Hartree/Particle)

Thermal correction to Energy= 0.477769

Thermal correction to Enthalpy= 0.478713

Thermal correction to Gibbs Free Energy= 0.381252

Sum of electronic and zero-point Energies= -1664.025934

Sum of electronic and thermal Energies= -1663.993191

Sum of electronic and thermal Enthalpies= -1663.992247

Sum of electronic and thermal Free Energies= -1664.089708

|    |             |             |             |
|----|-------------|-------------|-------------|
| Pd | 0.43516400  | 0.02901800  | -0.51782900 |
| C  | -1.35041100 | -0.76350700 | -1.36765300 |
| C  | -2.60523800 | -0.68332200 | -0.58681700 |
| C  | -3.72797100 | -0.05825300 | -1.15341900 |
| C  | -2.73097300 | -1.22006400 | 0.70739400  |
| C  | -4.93469600 | 0.02604900  | -0.46248000 |
| H  | -3.65549900 | 0.35375000  | -2.15554300 |
| C  | -3.93719700 | -1.13708100 | 1.39311200  |
| H  | -1.86847900 | -1.66576700 | 1.19089100  |
| C  | -5.04605100 | -0.51546100 | 0.81550900  |
| H  | -5.78806300 | 0.50931600  | -0.92611900 |
| H  | -4.01001000 | -1.55314900 | 2.39216800  |
| H  | -5.98328300 | -0.45348500 | 1.35705900  |
| C  | -0.45571000 | -1.90907100 | -1.30928600 |
| P  | -0.31491900 | 2.23543300  | -0.07173200 |
| P  | 2.87024100  | 0.07627100  | -0.17334100 |
| C  | -1.65170900 | 2.29894500  | 1.18988700  |
| H  | -2.50321900 | 1.70106000  | 0.86621100  |
| H  | -1.24839300 | 1.87541800  | 2.11117300  |
| H  | -1.97257600 | 3.33095500  | 1.36004100  |
| C  | -1.04128200 | 3.15979700  | -1.49718200 |
| H  | -1.88474200 | 2.59456100  | -1.89698200 |
| H  | -1.39089600 | 4.15033600  | -1.19271200 |
| H  | -0.29617000 | 3.27050600  | -2.28737200 |
| C  | 0.87844500  | 3.46009900  | 0.62157500  |
| H  | 1.66714300  | 3.67708900  | -0.09993500 |
| H  | 0.37030700  | 4.39323300  | 0.88099800  |
| H  | 1.31803600  | 3.02834000  | 1.52214400  |
| C  | 3.74887700  | -1.20788900 | -1.16984200 |
| H  | 3.37795200  | -2.18637000 | -0.86422600 |

|   |             |             |             |
|---|-------------|-------------|-------------|
| H | 3.53043900  | -1.06544600 | -2.23020900 |
| H | 4.83109200  | -1.15927100 | -1.01749300 |
| C | 3.54536400  | -0.22351600 | 1.51831800  |
| H | 3.38416800  | -1.27126300 | 1.77267900  |
| H | 4.61647800  | -0.00686800 | 1.55956600  |
| H | 3.00197100  | 0.38651800  | 2.24081000  |
| C | 3.79221800  | 1.60390900  | -0.67161000 |
| H | 4.87235900  | 1.43342200  | -0.65042100 |
| H | 3.50091700  | 1.90259300  | -1.68065100 |
| H | 3.55446100  | 2.41881200  | 0.01291100  |
| O | 0.27871600  | -1.91660600 | 2.22684600  |
| H | -1.42532800 | -0.27920100 | -2.34146600 |
| H | 0.61141900  | -1.93451500 | -0.34496700 |
| H | -0.85741300 | -2.71586200 | -0.69562900 |
| C | 0.15602800  | -2.42297200 | -2.60853400 |
| H | 0.49360100  | -1.59977700 | -3.24320700 |
| H | 1.01344200  | -3.06955400 | -2.40924200 |
| H | -0.57596200 | -3.00753100 | -3.17744200 |
| O | 1.36646200  | -2.82234500 | 0.46976900  |
| C | 1.01971100  | -2.75540900 | 1.69606700  |
| H | 1.45032000  | -3.55914500 | 2.33060000  |
| H | 0.48753000  | -0.13993000 | 2.66123300  |
| O | 0.66143800  | 0.75091400  | 3.02621600  |
| H | 0.62164900  | 0.62162300  | 3.97851200  |

### TS6<sub>ph</sub>w-al-a

|                                              |             |             |                             |
|----------------------------------------------|-------------|-------------|-----------------------------|
| Zero-point correction=                       |             |             | 0.449935 (Hartree/Particle) |
| Thermal correction to Energy=                |             |             | 0.482531                    |
| Thermal correction to Enthalpy=              |             |             | 0.483475                    |
| Thermal correction to Gibbs Free Energy=     |             |             | 0.385217                    |
| Sum of electronic and zero-point Energies=   |             |             | -1664.015719                |
| Sum of electronic and thermal Energies=      |             |             | -1663.983123                |
| Sum of electronic and thermal Enthalpies=    |             |             | -1663.982179                |
| Sum of electronic and thermal Free Energies= |             |             | -1664.080437                |
| Pd                                           | -0.30556800 | -0.09403100 | 0.03214800                  |
| C                                            | 1.50001900  | -0.58803000 | 1.08550200                  |
| P                                            | -1.34542400 | -1.95371700 | 0.92422300                  |
| P                                            | -2.18496400 | 0.76292600  | -1.40802200                 |
| C                                            | -3.04765000 | -1.60691100 | 1.54302800                  |
| H                                            | -2.99241700 | -0.88790500 | 2.36193300                  |
| H                                            | -3.65874200 | -1.17507700 | 0.75125000                  |
| H                                            | -3.52465000 | -2.52359100 | 1.90021400                  |
| C                                            | -0.64865600 | -2.89927600 | 2.34642100                  |
| H                                            | -0.47740000 | -2.23041600 | 3.19041300                  |

|   |             |             |             |
|---|-------------|-------------|-------------|
| H | -1.34957400 | -3.68327800 | 2.64460700  |
| H | 0.30003500  | -3.36353400 | 2.07590200  |
| C | -1.60715500 | -3.28951700 | -0.31901000 |
| H | -0.63788400 | -3.63762000 | -0.67958400 |
| H | -2.15415400 | -4.13074200 | 0.11568000  |
| H | -2.16271200 | -2.90008300 | -1.17173600 |
| C | -3.27002200 | -0.42124800 | -2.33928800 |
| H | -2.65999100 | -1.01937400 | -3.01993100 |
| H | -3.78504200 | -1.09877900 | -1.65520400 |
| H | -4.02407600 | 0.11229800  | -2.92439500 |
| C | -1.67073300 | 1.88825900  | -2.77699900 |
| H | -0.95459800 | 1.38423500  | -3.42819000 |
| H | -2.53887200 | 2.19549200  | -3.36659300 |
| H | -1.19651900 | 2.76825700  | -2.34579500 |
| C | -3.41122600 | 1.78941400  | -0.49485200 |
| H | -4.15681600 | 2.21302100  | -1.17323700 |
| H | -3.91991200 | 1.19210000  | 0.26395100  |
| H | -2.85442300 | 2.58476900  | -0.00024000 |
| C | 0.63408500  | 2.52049300  | -0.33158900 |
| O | 1.69254000  | 3.14623100  | -0.25620600 |
| O | -0.48189800 | 2.70030200  | 0.21772400  |
| H | 0.67703100  | 1.58290400  | -1.00991100 |
| H | 1.35949900  | -1.52024100 | 1.62609100  |
| C | 1.83062400  | 0.53230500  | 2.06486100  |
| H | 2.84952700  | 0.33892300  | 2.43495200  |
| H | 1.87916200  | 1.50543400  | 1.57947200  |
| C | 2.39300800  | -0.81926500 | -0.07725300 |
| C | 3.11963900  | 0.21437400  | -0.70109100 |
| C | 2.54943400  | -2.12690900 | -0.58363200 |
| C | 3.95566400  | -0.05802100 | -1.78002000 |
| H | 3.01963400  | 1.23649300  | -0.35650000 |
| C | 3.38492600  | -2.39473900 | -1.65917400 |
| H | 2.01704900  | -2.94414200 | -0.10600100 |
| C | 4.09385700  | -1.35664800 | -2.26588700 |
| H | 4.50424900  | 0.75539100  | -2.24171400 |
| H | 3.49355400  | -3.41187000 | -2.02001800 |
| H | 4.75103400  | -1.56115700 | -3.10364100 |
| C | 0.88108000  | 0.63443000  | 3.26126200  |
| H | -0.14762400 | 0.79832900  | 2.92853500  |
| H | 0.90870600  | -0.26856000 | 3.88221200  |
| H | 1.15478500  | 1.49103700  | 3.87850800  |
| O | 0.96832500  | 3.97397800  | 2.44369200  |
| H | 0.16881900  | 3.67847100  | 1.98343900  |
| H | 1.57117200  | 4.03016100  | 1.68834000  |

**M7<sub>ph</sub>w-al-a**

|                                              |             |             |                             |
|----------------------------------------------|-------------|-------------|-----------------------------|
| Zero-point correction=                       |             |             | 0.450509 (Hartree/Particle) |
| Thermal correction to Energy=                |             |             | 0.483283                    |
| Thermal correction to Enthalpy=              |             |             | 0.484228                    |
| Thermal correction to Gibbs Free Energy=     |             |             | 0.386090                    |
| Sum of electronic and zero-point Energies=   |             |             | -1664.028930                |
| Sum of electronic and thermal Energies=      |             |             | -1663.996155                |
| Sum of electronic and thermal Enthalpies=    |             |             | -1663.995211                |
| Sum of electronic and thermal Free Energies= |             |             | -1664.093348                |
| Pd                                           | 0.07120000  | -0.18630000 | -0.18520000                 |
| C                                            | 0.71290000  | -2.05290000 | 0.66820000                  |
| P                                            | -1.78610000 | -1.07780000 | -1.31580000                 |
| P                                            | 0.01920000  | 2.16910000  | -0.85160000                 |
| C                                            | -3.10150000 | 0.12060000  | -1.77740000                 |
| H                                            | -3.50540000 | 0.53060000  | -0.84890000                 |
| H                                            | -2.69210000 | 0.92170000  | -2.39400000                 |
| H                                            | -3.89480000 | -0.38430000 | -2.33640000                 |
| C                                            | -2.78300000 | -2.40920000 | -0.53560000                 |
| H                                            | -3.22340000 | -1.99590000 | 0.37180000                  |
| H                                            | -3.57370000 | -2.73610000 | -1.21710000                 |
| H                                            | -2.15540000 | -3.26170000 | -0.27790000                 |
| C                                            | -1.29730000 | -1.82050000 | -2.93500000                 |
| H                                            | -0.60690000 | -2.64840000 | -2.76440000                 |
| H                                            | -2.17020000 | -2.19070000 | -3.48070000                 |
| H                                            | -0.78430000 | -1.07270000 | -3.54190000                 |
| C                                            | 0.21620000  | 2.59170000  | -2.64040000                 |
| H                                            | 1.14320000  | 2.15470000  | -3.01680000                 |
| H                                            | -0.61410000 | 2.18070000  | -3.21810000                 |
| H                                            | 0.24590000  | 3.67450000  | -2.78990000                 |
| C                                            | 1.38640000  | 3.12140000  | -0.06530000                 |
| H                                            | 2.34490000  | 2.75700000  | -0.43730000                 |
| H                                            | 1.29330000  | 4.18850000  | -0.28480000                 |
| H                                            | 1.34920000  | 2.96170000  | 1.01440000                  |
| C                                            | -1.46440000 | 3.13300000  | -0.34500000                 |
| H                                            | -1.32250000 | 4.19520000  | -0.56250000                 |
| H                                            | -2.34860000 | 2.77360000  | -0.87100000                 |
| H                                            | -1.62330000 | 2.99070000  | 0.72640000                  |
| C                                            | -0.40100000 | 1.25450000  | 2.57230000                  |
| O                                            | 0.70990000  | 1.46080000  | 3.07450000                  |
| O                                            | -1.52410000 | 1.77370000  | 2.77480000                  |
| H                                            | -0.42290000 | 0.44690000  | 1.74890000                  |
| H                                            | 0.43050000  | -2.92200000 | 0.07380000                  |
| C                                            | 0.40830000  | -2.22330000 | 2.15050000                  |

|   |             |             |             |
|---|-------------|-------------|-------------|
| H | 1.05030000  | -3.04790000 | 2.49770000  |
| H | 0.72690000  | -1.34310000 | 2.71070000  |
| C | 1.98590000  | -1.46510000 | 0.26630000  |
| C | 2.46590000  | -0.29610000 | 0.92030000  |
| C | 2.70770000  | -1.94540000 | -0.86160000 |
| C | 3.64710000  | 0.31970000  | 0.47260000  |
| H | 1.98370000  | 0.09860000  | 1.81320000  |
| C | 3.87320000  | -1.33410000 | -1.27240000 |
| H | 2.34170000  | -2.82690000 | -1.37730000 |
| C | 4.35240000  | -0.19510000 | -0.60040000 |
| H | 4.01210000  | 1.19270000  | 1.00110000  |
| H | 4.42700000  | -1.73640000 | -2.11360000 |
| H | 5.27680000  | 0.27160000  | -0.92180000 |
| C | -1.04230000 | -2.55070000 | 2.50990000  |
| H | -1.71360000 | -1.72840000 | 2.25410000  |
| H | -1.38970000 | -3.45570000 | 2.00180000  |
| H | -1.12610000 | -2.72810000 | 3.58530000  |
| O | -3.36690000 | 0.31110000  | 1.46090000  |
| H | -2.70320000 | 0.87940000  | 1.94200000  |
| H | -4.07830000 | 0.20310000  | 2.09880000  |

#### TS6<sub>Me</sub>-al-a

|                                              |             |             |                             |
|----------------------------------------------|-------------|-------------|-----------------------------|
| Zero-point correction=                       |             |             | 0.424913 (Hartree/Particle) |
| Thermal correction to Energy=                |             |             | 0.454014                    |
| Thermal correction to Enthalpy=              |             |             | 0.454958                    |
| Thermal correction to Gibbs Free Energy=     |             |             | 0.364930                    |
| Sum of electronic and zero-point Energies=   |             |             | -1587.571166                |
| Sum of electronic and thermal Energies=      |             |             | -1587.542065                |
| Sum of electronic and thermal Enthalpies=    |             |             | -1587.541121                |
| Sum of electronic and thermal Free Energies= |             |             | -1587.631150                |
| Pd                                           | -0.57167300 | -0.14498200 | 0.58326100                  |
| C                                            | 1.07091800  | -0.85365500 | 1.74295100                  |
| P                                            | 0.18015500  | 2.00940600  | 0.82543700                  |
| P                                            | -2.55653300 | 0.28392800  | -0.91351700                 |
| C                                            | 0.50290500  | 2.82296400  | -0.79604300                 |
| H                                            | 1.30020500  | 2.28109300  | -1.30799400                 |
| H                                            | -0.39039400 | 2.78629300  | -1.41976000                 |
| H                                            | 0.80091200  | 3.86613000  | -0.65876000                 |
| C                                            | 1.71479700  | 2.43230000  | 1.75196400                  |
| H                                            | 2.57328100  | 1.94189500  | 1.29211700                  |
| H                                            | 1.86502600  | 3.51485500  | 1.72887900                  |
| H                                            | 1.63707700  | 2.10827900  | 2.79071400                  |
| C                                            | -1.04788300 | 3.11637100  | 1.64257500                  |
| H                                            | -1.20549600 | 2.77707500  | 2.66786500                  |



|   |             |             |             |
|---|-------------|-------------|-------------|
| H | -0.69244400 | 4.15044500  | 1.65752000  |
| H | -2.00203200 | 3.07219100  | 1.11996000  |
| C | -3.50006700 | 1.88436500  | -0.93642200 |
| H | -3.94993600 | 2.06434200  | 0.04263100  |
| H | -2.84133000 | 2.72259200  | -1.17262300 |
| H | -4.29828700 | 1.85555000  | -1.68323900 |
| C | -3.94401200 | -0.91546500 | -0.71917500 |
| H | -4.34161400 | -0.86529200 | 0.29605200  |
| H | -4.74572400 | -0.69765500 | -1.43026500 |
| H | -3.55791600 | -1.91741400 | -0.89781300 |
| C | -2.10128100 | 0.08997800  | -2.68750900 |
| H | -2.97529400 | 0.19519900  | -3.33614200 |
| H | -1.35533900 | 0.83621900  | -2.96802100 |
| H | -1.66590200 | -0.90216000 | -2.80111400 |
| C | -1.15826500 | -2.72131300 | 0.24548300  |
| O | -0.92613200 | -3.80213700 | 0.76133800  |
| O | -1.02706300 | -2.28169900 | -0.92760200 |
| H | -1.57616200 | -1.91125600 | 0.99768300  |
| H | 1.66121600  | -0.00646200 | 2.08348800  |
| C | 1.95793600  | -1.74177700 | 0.85825700  |
| H | 2.73872800  | -2.15931200 | 1.51352500  |
| H | 1.39217800  | -2.59738900 | 0.48703600  |
| C | 0.49609500  | -1.58556300 | 2.95111100  |
| H | -0.06490900 | -2.47723300 | 2.66570600  |
| H | 1.31817800  | -1.91571800 | 3.60427300  |
| H | -0.15076400 | -0.93771900 | 3.54953100  |
| C | 2.62819400  | -1.01541100 | -0.28786100 |
| C | 2.07570300  | -1.04368300 | -1.57446400 |
| C | 3.80977300  | -0.29188000 | -0.08674000 |
| C | 2.68290000  | -0.35373000 | -2.62312000 |
| H | 1.16784300  | -1.61445800 | -1.74107200 |
| C | 4.41731500  | 0.40165600  | -1.13322700 |
| H | 4.27028700  | -0.28736300 | 0.89734500  |
| C | 3.85205400  | 0.37559700  | -2.40707900 |
| H | 2.24740100  | -0.39723000 | -3.61591300 |
| H | 5.33888300  | 0.94673800  | -0.95796900 |
| H | 4.32801700  | 0.90307000  | -3.22654700 |
